# Supplementary material for: Cobalt-catalyzed regio- and diastereoselective carbocyclization/arylation of 1,5-bisallenes
Source: Royal Society of Chemistry journal article supplement (doi:10.1039/d4qo01818d), 2024-12-03

## Supporting Information

# Cobalt-catalyzed regio- and diastereoselective carbocyclization/arylation of 1,5-bisallenes

Tao Wang, Hua Huang, Ji-Xun Guan, Xiao-Die An,  
Yun-Xuan Tan,\* and Ping Tian\*

The Research Center of Chiral Drugs, Innovation Research Institute of Traditional Chinese Medicine, Shanghai University of Traditional Chinese Medicine, 1200 Cailun Road, Shanghai 201203, China.

\*E-mail: tanyx1993@shutcm.edu.cn and tianping@shutcm.edu.cn.

## Table of Contents

|                                                              |     |
|--------------------------------------------------------------|-----|
| 1. General Information.....                                  | S2  |
| 2. Substrate Preparation.....                                | S3  |
| 3. Substrate Scope of 1,5-Bisallenes.....                    | S7  |
| 4. X-ray Crystal Structure of 3ga.....                       | S21 |
| 5. Scale-up Reaction and Product Transformations .....       | S24 |
| 6. Mechanistic Experiments and Possible Catalytic Cycle..... | S27 |
| 7. References.....                                           | S30 |
| 8. NMR Spectra.....                                          | S31 |

## 1. General Information

All reagents were purchased and used without further purification unless otherwise specified. Flash column chromatography was performed over silica gel (300-400 mesh) purchased from Shanghai Titan Scientific Co., Ltd. Anhydrous tetrahydrofuran (THF), *tert*-Butyl methyl ether (MTBE), acetone, dimethyl sulfoxide (DMSO), 1,4-dioxane, toluene, acetonitrile (CH<sub>3</sub>CN) and 2-Methyltetrahydrofuran (2-Me-THF) were purchased from Shanghai Titan Scientific Co., Ltd. and used as received. CoCl<sub>2</sub> and CoBr<sub>2</sub> were purchased from Alfa Aesar. Co(OAc)<sub>2</sub> was purchased from Sigma-Aldrich. Co(acac)<sub>2</sub> was purchased from TCI Chemicals. CoCl<sub>2</sub>(PPh<sub>3</sub>)<sub>2</sub> and CoCl(PPh<sub>3</sub>)<sub>3</sub> were purchased from Shanghai Bide Pharmatech Co., Ltd. Co<sub>2</sub>(CO)<sub>8</sub> was purchased from Shanghai Titan Scientific Co., Ltd.

<sup>1</sup>H, <sup>13</sup>C, <sup>19</sup>F NMR spectra were collected on a Bruker AV 400 MHz and 600 MHz NMR spectrometer using residue solvent peaks as an internal standard (<sup>1</sup>H NMR: CDCl<sub>3</sub> at 7.26 ppm, <sup>13</sup>C NMR: CDCl<sub>3</sub> at 77.0 ppm). The data are reported as follows: chemical shift (ppm), multiplicity (s = singlet, d = doublet, t = triplet, q = quartet, m = multiplet), coupling constant *J* (Hz), and integration. High resolution mass spectra were acquired by Agilent 6545 Accurate-Mass Q-TOF LC/MS System. X-ray structure was determined on a Bruker D8 Venture X-ray Diffraction meter.

## 2. Substrate Preparation

Bisallenenes **1a-1c**,<sup>[1]</sup> **1d**,<sup>[2]</sup> **1e-1h**,<sup>[1]</sup> **1i**,<sup>[3]</sup> **1m**,<sup>[1]</sup> **1n**,<sup>[4]</sup> **1o**,<sup>[5]</sup> and **1p**,<sup>[6]</sup> are known compounds. They were prepared according to the literatures. Other substrates were prepared according to the following procedures, which were unoptimized.

### General procedure A: Synthesis bisallenenes **1i-1k**

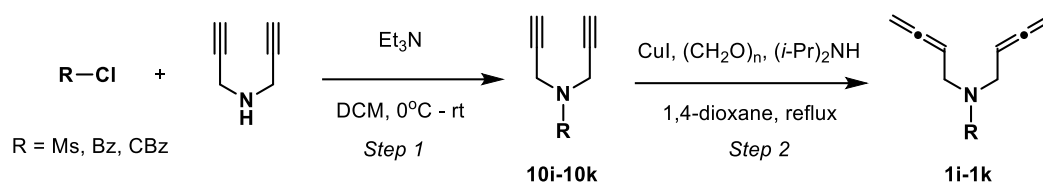

**Step 1:** In an oven-dried 100 mL round-bottom flask equipped with a magnetic stirrer, a mixture of dipropargylamine (1.2 equiv, 12 mmol), triethylamine (1.4 equiv, 14 mmol) and DCM (20 mL) was stirred at room temperature for 10 minutes. R-Cl (1.0 equiv, 10 mmol) was then added dropwise at 0 °C and the reaction mixture was stirred overnight and allowed to warm to room temperature. The solids were filtered off and the filtrate was concentrated under reduced pressure. The crude was mixed with water and extracted with DCM. The combined organic layers were washed with brine and dried over anhydrous Na<sub>2</sub>SO<sub>4</sub>, filtered and concentrated *in vacuo*. The crude diyne product **10** was directly used in the next step without further purification.

**Step 2:** In an oven-dried 100 mL round-bottom charged with diyne **10** (1.0 equiv, 10 mmol), paraformaldehyde (5.0 equiv, 50 mmol) and CuI (1.0 equiv, 10 mmol) was evacuated and backfilled with N<sub>2</sub> for three times. Then, diisopropylamine (4.0 equiv, 40 mmol) and 1,4-dioxane (50 mL) were added and the resulting mixture was stirred at reflux for 16 h until completion (TLC monitoring). The reaction mixture was allowed to cool to room temperature, concentrated under reduced pressure. The resulting crude was purified by column chromatography (SiO<sub>2</sub>) to afford the corresponding bisallenenes **1i-1k**.

***N,N*-di(buta-2,3-dien-1-yl)methanesulfonamide (1i)**

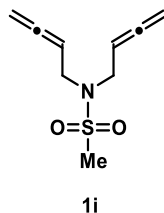

**General procedure A**,  $R_f = 0.5$  (PE/EA = 5/1), yellow oil (425.1 mg, 21% yield).

$^1\text{H}$  NMR (600 MHz,  $\text{CDCl}_3$ )  $\delta$  (ppm) 5.19 – 5.10 (m, 2H), 4.87 – 4.82 (m, 4H), 3.94 – 3.91 (m, 4H), 2.89 (s, 3H).

$^{13}\text{C}$  NMR (150 MHz,  $\text{CDCl}_3$ )  $\delta$  (ppm) 209.7, 85.8, 76.6, 45.3, 40.3.

**HRMS (ESI-TOF)**:  $[\text{M}+\text{Na}]^{\oplus}$  calcd for  $\text{C}_9\text{H}_{13}\text{NNaO}_2\text{S}^{\oplus}$  222.0559, found 222.0564.

***N,N*-di(buta-2,3-dien-1-yl)benzamide (1j)**

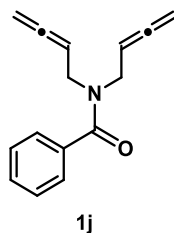

**General procedure A**,  $R_f = 0.5$  (PE/EA = 5/1), yellow oil (351.8 mg, 16% yield).

$^1\text{H}$  NMR (400 MHz,  $\text{CDCl}_3$ )  $\delta$  (ppm) 7.45 – 7.34 (m, 5H), 5.38 – 4.99 (m, 2H), 4.90 – 4.73 (m, 4H), 4.24 – 3.73 (m, 4H).

$^{13}\text{C}$  NMR (150 MHz,  $\text{CDCl}_3$ )  $\delta$  (ppm) 209.1, 171.6, 136.2, 129.6, 128.4, 126.7, 86.6, 76.9, 45.2.

**HRMS (ESI-TOF)**:  $[\text{M}+\text{Na}]^{\oplus}$  calcd for  $\text{C}_{15}\text{H}_{15}\text{NNaO}^{\oplus}$  248.1046, found 248.1052.

**Benzyl di(buta-2,3-dien-1-yl)carbamate (1k)**

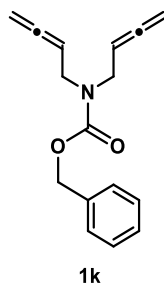



**General procedure A**,  $R_f = 0.8$  (PE/EA = 5/1), colorless oil (1.1 g, 80% yield).

$^1\text{H}$  NMR (600 MHz,  $\text{CDCl}_3$ )  $\delta$  (ppm) 7.39 – 7.29 (m, 5H), 5.18 – 5.04 (m, 4H), 4.80 – 4.68 (m, 4H), 4.00 – 3.86 (m, 4H).

$^{13}\text{C}$  NMR (150 MHz,  $\text{CDCl}_3$ )  $\delta$  (ppm) 209.0, 155.8, 136.7, 128.4, 127.9, 127.8, 86.8, 76.3, 67.1, 45.3.

**HRMS (ESI-TOF):**  $[\text{M}+\text{Na}]^{\oplus}$  calcd for  $\text{C}_{16}\text{H}_{17}\text{NNaO}_2^{\oplus}$  278.1151, found 278.1156.

Synthesis bisallene **1q**:

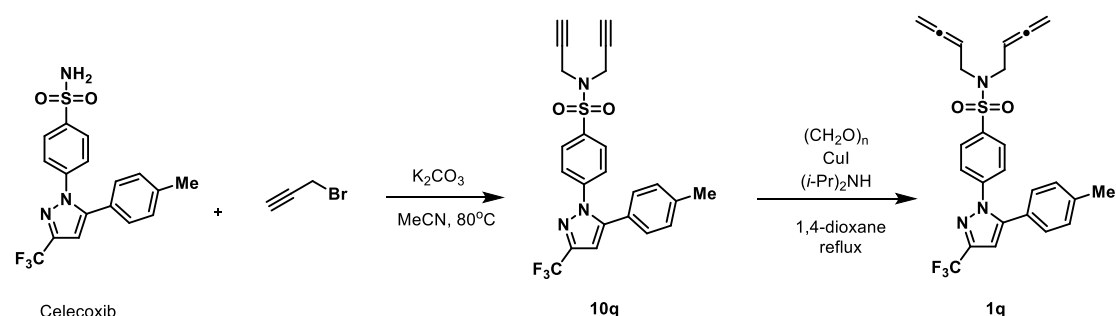

**Step1:** An oven-dried 50 mL round-bottom flask charged with Celecoxib (1.0 equiv, 5 mmol), 3-Bromopropyne (3.0 equiv, 15 mmol),  $\text{K}_2\text{CO}_3$  (3.0 equiv, 15 mmol), and MeCN (10 mL) was refluxed at  $80^\circ\text{C}$  in oil bath for 12 h. The reaction mixture was allowed to cool to room temperature, concentrated under reduced pressure. The resulting crude was purified by column chromatography ( $\text{SiO}_2$ ) to afford the corresponding product **10q**.

**Step2:** In an oven-dried 100 mL round-bottom charged with diyne **10q** (1.0 equiv, 4.7 mmol), paraformaldehyde (5.0 equiv, 23.5 mmol) and CuI (1.0 equiv, 4.7 mmol) was evacuated and backfilled with  $\text{N}_2$  for three times. Then, diisopropylamine (4.0 equiv, 18.8 mmol) and 1,4-dioxane (24 mL) were added and the resulting mixture was stirred at reflux for 16 h until completion (TLC monitoring). The reaction mixture was allowed to cool to room temperature, concentrated under reduced pressure. The resulting crude was purified by column chromatography ( $\text{SiO}_2$ ) to afford the corresponding bisallene **1q**.

***N,N*-di(buta-2,3-dien-1-yl)-4-(5-(*p*-tolyl)-3-(trifluoromethyl)-1H-pyrazol-1-yl)benzenesulfonamide (1q)**

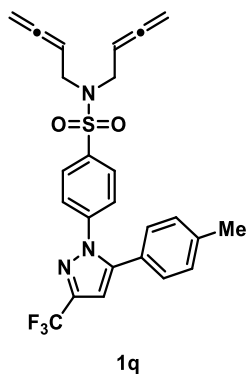

$R_f$  = 0.5 (PE/EA = 10/1), yellow oil (1.6 g, 70% yield).

**$^1\text{H}$  NMR** (400 MHz,  $\text{CDCl}_3$ )  $\delta$  (ppm) 7.81 (d,  $J$  = 8.5 Hz, 2H), 7.46 (d,  $J$  = 8.5 Hz, 2H), 7.17 (d,  $J$  = 7.9 Hz, 2H), 7.09 (d,  $J$  = 8.0 Hz, 2H), 6.74 (s, 1H), 4.96– 4.87 (m, 1H), 4.77 – 4.70 (m, 4H), 3.93 – 3.87 (m, 4H), 2.38 (s, 3H).

**$^{13}\text{C}$  NMR** (150 MHz,  $\text{CDCl}_3$ )  $\delta$  (ppm) 209.7, 145.2, 144.1 (q,  $J$  = 38.3 Hz), 142.4, 140.1, 139.8, 129.7, 128.7, 128.1, 125.7, 125.6, 121.5 (q,  $J$  = 267.7 Hz), 106.2, 85.3, 76.5, 45.7, 21.3.

**$^{19}\text{F}$  NMR** (376 MHz,  $\text{CDCl}_3$ )  $\delta$  (ppm) -62.4.

**HRMS (ESI-TOF):**  $[\text{M}+\text{Na}]^{\oplus}$  calcd for  $\text{C}_{25}\text{H}_{22}\text{F}_3\text{N}_3\text{NaO}_2\text{S}^{\oplus}$  508.1277, found 508.1288.

### 3. Substrate Scope of 1,5-Bisallenenes

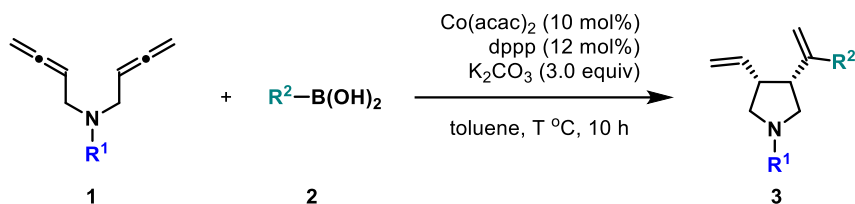

**Condition A:** In a glove box, an oven-dried 4-mL vial was charged with bisallene **1** (0.2 mmol, 1.0 equiv), arylboronic acid **2** (0.6 mmol, 3.0 equiv), K<sub>2</sub>CO<sub>3</sub> (0.6 mmol, 3.0 equiv), Co(acac)<sub>2</sub> (0.02 mmol, 0.1 equiv), dppp (0.024 mmol, 0.12 equiv) and toluene (2.0 mL). The vial was capped and removed from the glove box. The reaction mixture was stirred at 70 °C for 10 h. Then the reaction mixture was cooled to room temperature and concentrated *in vacuo*. The residue was purified by silica gel flash column chromatography to give the desired product **3**.

**Condition B:** In a glove box, an oven-dried 4-mL vial was charged with bisallene **1** (0.2 mmol, 1.0 equiv), arylboronic acid **2** (0.6 mmol, 3.0 equiv), K<sub>2</sub>CO<sub>3</sub> (0.6 mmol, 3.0 equiv), Co(acac)<sub>2</sub> (0.02 mmol, 0.1 equiv), dppp (0.024 mmol, 0.12 equiv) and toluene (2.0 mL). The vial was capped and removed from the glove box. The reaction mixture was stirred at 80 °C for 10 h. Then the reaction mixture was cooled to room temperature and concentrated *in vacuo*. The residue was purified by silica gel flash column chromatography to give the desired product **3**.

#### 3-(1-Phenylvinyl)-1-tosyl-4-vinylpyrrolidine (3aa)

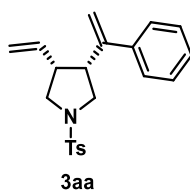

**Condition A**, R<sub>f</sub> = 0.4 (PE/EA = 10/1), yellow oil (59 mg, 84% yield).

$^1\text{H}$  NMR (600 MHz,  $\text{CDCl}_3$ )  $\delta$  (ppm) 7.77 (d,  $J$  = 8.2 Hz, 2H), 7.35 (d,  $J$  = 8.0 Hz, 2H), 7.30 – 7.25 (m, 3H), 7.24 – 7.20 (m, 2H), 5.30 – 5.21 (m, 2H), 4.88 (d,  $J$  = 1.4 Hz, 1H), 4.80 (d,  $J$  = 10.4 Hz, 1H), 4.63 – 4.55 (m, 1H), 3.67 (dd,  $J$  = 9.5, 6.9 Hz, 1H), 3.49 (dd,  $J$  = 10.2, 6.3 Hz, 1H), 3.41 (t,  $J$  = 9.6 Hz, 1H), 3.37 – 3.30 (m, 2H), 2.79 – 2.73 (m, 1H), 2.46 (s, 3H).

$^{13}\text{C}$  NMR (150 MHz,  $\text{CDCl}_3$ )  $\delta$  (ppm) 145.6, 143.5, 141.4, 134.5, 134.3, 129.7, 128.3, 127.6, 127.5, 126.4, 116.7, 114.0, 52.3, 49.7, 45.8, 44.3, 21.5.

HRMS (ESI-TOF):  $[\text{M}+\text{Na}]^{\oplus}$  calcd for  $\text{C}_{21}\text{H}_{23}\text{NNaO}_2\text{S}^{\oplus}$  376.1342, found 376.1353.

### 3-(1-(*p*-Tolyl)vinyl)-1-tosyl-4-vinylpyrrolidine (3ab)

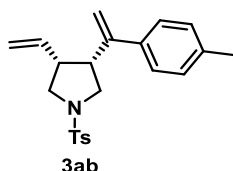

**Condition B**,  $R_f$  = 0.3 (PE/EA = 10/1), colorless oil (48.1 mg, 66% yield).

$^1\text{H}$  NMR (600 MHz,  $\text{CDCl}_3$ )  $\delta$  (ppm) 7.77 (d,  $J$  = 8.2 Hz, 2H), 7.35 (d,  $J$  = 8.0 Hz, 2H), 7.15 – 7.05 (m, 4H), 5.29 – 5.19 (m, 2H), 4.84 – 4.77 (m, 2H), 4.59 (d,  $J$  = 17.2 Hz, 1H), 3.66 (dd,  $J$  = 9.6, 6.9 Hz, 1H), 3.49 (dd,  $J$  = 10.2, 6.3 Hz, 1H), 3.40 (t,  $J$  = 9.6 Hz, 1H), 3.36 – 3.27 (m, 2H), 2.80 – 2.72 (m, 1H), 2.45 (s, 3H), 2.32 (s, 3H).

$^{13}\text{C}$  NMR (100 MHz,  $\text{CDCl}_3$ )  $\delta$  (ppm) 145.3, 143.4, 138.5, 137.4, 134.5, 134.2, 129.7, 129.0, 127.5, 126.2, 116.6, 113.2, 52.2, 49.7, 45.8, 44.3, 21.5, 21.1.

HRMS (ESI-TOF):  $[\text{M}+\text{Na}]^{\oplus}$  calcd for  $\text{C}_{22}\text{H}_{25}\text{NNaO}_2\text{S}^{\oplus}$  390.1498, found 390.1509.

### 3-(1-(4-(*tert*-Butyl)phenyl)vinyl)-1-tosyl-4-vinylpyrrolidine (3ac)

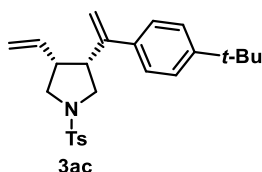

**Condition B**,  $R_f$  = 0.4 (PE/EA = 10/1), white solid (50.1 mg, 61% yield).

$^1\text{H}$  NMR (600 MHz,  $\text{CDCl}_3$ )  $\delta$  (ppm) 7.77 (d,  $J$  = 8.2 Hz, 2H), 7.35 (d,  $J$  = 8.2 Hz, 2H), 7.30 (d,  $J$  = 8.4 Hz, 2H), 7.16 (d,  $J$  = 8.4 Hz, 2H), 5.32 – 5.23 (m, 2H), 4.85 –

4.80 (m, 2H), 4.65 – 4.58 (m, 1H), 3.66 (dd,  $J = 9.5, 6.9$  Hz, 1H), 3.49 (dd,  $J = 10.2, 6.3$  Hz, 1H), 3.42 – 3.28 (m, 3H), 2.83 – 2.75 (m, 1H), 2.46 (s, 3H), 1.30 (s, 9H).

$^{13}\text{C}$  NMR (150 MHz,  $\text{CDCl}_3$ )  $\delta$  (ppm) 150.7, 145.2, 143.4, 138.4, 134.6, 134.3, 129.7, 127.5, 125.9, 125.2, 116.6, 113.3, 52.2, 49.8, 45.8, 44.2, 34.5, 31.3, 21.6.

HRMS (ESI-TOF):  $[\text{M}+\text{Na}]^{\oplus}$  calcd for  $\text{C}_{25}\text{H}_{31}\text{NNaO}_2\text{S}^{\oplus}$  432.1968, found 432.1984.

### 3-(1-([1,1'-Biphenyl]-4-yl)vinyl)-1-tosyl-4-vinylpyrrolidine (3ad)

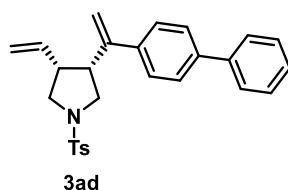

**Condition A**,  $R_f = 0.3$  (PE/EA = 10/1), white solid (50.2 mg, 59% yield).

$^1\text{H}$  NMR (400 MHz,  $\text{CDCl}_3$ )  $\delta$  (ppm) 7.78 (d,  $J = 8.2$  Hz, 2H), 7.58 (dd,  $J = 8.4, 2\text{H}$ ), 7.52 (dd,  $J = 8.3, 2\text{H}$ ), 7.43 (t,  $J = 7.5$  Hz, 2H), 7.38 – 7.27 (m, 5H), 5.40 – 5.18 (m, 2H), 4.91 (s, 1H), 4.83 (d,  $J = 10.4$  Hz, 1H), 4.63 (d,  $J = 17.2$  Hz, 1H), 3.69 (dd,  $J = 9.1, 6.5$  Hz, 1H), 3.52 (dd,  $J = 10.2, 6.3$  Hz, 1H), 3.44 (t,  $J = 9.3$  Hz, 1H), 3.40 – 3.31 (m, 2H), 2.91 – 2.75 (m, 1H), 2.46 (s, 3H).

$^{13}\text{C}$  NMR (150 MHz,  $\text{CDCl}_3$ )  $\delta$  (ppm) 145.1, 143.5, 140.4, 140.3, 134.5, 134.2, 129.8, 128.8, 127.5, 127.4, 127.0, 126.9, 126.7, 116.8, 113.9, 52.3, 49.8, 45.8, 44.4, 21.6.

HRMS (ESI-TOF):  $[\text{M}+\text{Na}]^{\oplus}$  calcd for  $\text{C}_{27}\text{H}_{27}\text{NNaO}_2\text{S}^{\oplus}$  452.1655, found 452.1663.

### 1-Tosyl-3-(1-(4-(trifluoromethyl)phenyl)vinyl)-4-vinylpyrrolidine (3ae)

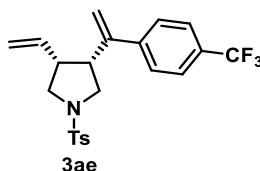

**Condition B**,  $R_f = 0.3$  (PE/EA = 10/1), white solid (44.7 mg, 53% yield).

$^1\text{H}$  NMR (400 MHz,  $\text{CDCl}_3$ )  $\delta$  (ppm) 7.77 (d,  $J = 7.7$  Hz, 2H), 7.54 (d,  $J = 7.7$  Hz, 2H), 7.41 – 7.29 (m, 4H), 5.32 (s, 1H), 5.27 – 5.16 (m, 1H), 4.99 (s, 1H), 4.80 (d,  $J =$

10.2 Hz, 1H), 4.58 (d,  $J = 17.0$  Hz, 1H), 3.73 – 3.64 (m, 1H), 3.55 – 3.47 (m, 1H), 3.43 (t,  $J = 9.3$  Hz, 1H), 3.38 – 3.29 (m, 2H), 2.77 – 2.69 (m, 1H), 2.46 (s, 3H).

$^{13}\text{C}$  NMR (100 MHz,  $\text{CDCl}_3$ )  $\delta$  (ppm) 145.0, 144.6, 143.6, 134.2, 134.0, 129.8, 129.6 (q,  $J = 32.3$  Hz), 127.4, 126.7, 125.2 (q,  $J = 3.6$  Hz), 124.0 (q,  $J = 270.3$  Hz), 117.1, 115.8, 52.3, 49.7, 45.6, 44.4, 21.5.

$^{19}\text{F}$  NMR (376 MHz,  $\text{CDCl}_3$ )  $\delta$  (ppm) -62.5.

HRMS (ESI-TOF):  $[\text{M}+\text{Na}]^{\oplus}$  calcd for  $\text{C}_{22}\text{H}_{22}\text{F}_3\text{NNaO}_2\text{S}^{\oplus}$  444.1216, found 444.1225.

### 3-(1-(4-(Methylthio)phenyl)vinyl)-1-tosyl-4-vinylpyrrolidine (3af)

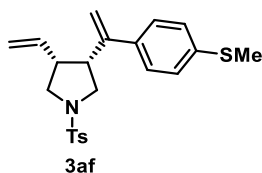

**Condition B**,  $R_f = 0.4$  (PE/EA = 10/1), white solid (29.3 mg, 37% yield).

$^1\text{H}$  NMR (600 MHz,  $\text{CDCl}_3$ )  $\delta$  (ppm) 7.80 – 7.74 (m, 2H), 7.36 (d,  $J = 7.9$  Hz, 2H), 7.18 – 7.13 (m, 4H), 5.26 – 5.18 (m, 2H), 4.85 (d,  $J = 1.5$  Hz, 1H), 4.79 (d,  $J = 10.4$  Hz, 1H), 4.59 (dt,  $J = 17.1, 1.2$  Hz, 1H), 3.66 (dd,  $J = 9.6, 6.9$  Hz, 1H), 3.49 (dd,  $J = 10.2, 6.3$  Hz, 1H), 3.40 (t,  $J = 9.5$  Hz, 1H), 3.36 – 3.27 (m, 2H), 2.79 – 2.72 (m, 1H), 2.47 (s, 3H), 2.46 (s, 3H).

$^{13}\text{C}$  NMR (150 MHz,  $\text{CDCl}_3$ )  $\delta$  (ppm) 144.8, 143.5, 138.0, 137.9, 134.4, 134.1, 129.7, 127.4, 126.7, 126.2, 116.7, 113.5, 52.2, 49.7, 45.6, 44.3, 21.6, 15.6.

HRMS (ESI-TOF):  $[\text{M}+\text{Na}]^{\oplus}$  calcd for  $\text{C}_{22}\text{H}_{25}\text{NNaO}_2\text{S}_2^{\oplus}$  422.1219, found 422.1227.

### 1-Tosyl-3-(1-(4-(trimethylsilyl)phenyl)vinyl)-4-vinylpyrrolidine (3ag)

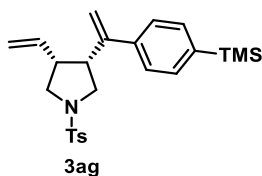

**Condition B**,  $R_f = 0.4$  (PE/EA = 10/1), white solid (52.3 mg, 62% yield).

$^1\text{H}$  NMR (600 MHz,  $\text{CDCl}_3$ )  $\delta$  (ppm) 7.77 (d,  $J = 8.2$  Hz, 2H), 7.44 (d,  $J = 8.1$  Hz, 2H), 7.35 (d,  $J = 8.0$  Hz, 2H), 7.21 (d,  $J = 8.1$  Hz, 2H), 5.33 – 5.26 (m, 2H), 4.89 (d,  $J = 1.1$  Hz, 1H), 4.83 (d,  $J = 10.4$  Hz, 1H), 4.64 (d,  $J = 17.2$  Hz, 1H), 3.67 (dd,  $J = 9.5$ , 6.9 Hz, 1H), 3.50 (dd,  $J = 10.2$ , 6.3 Hz, 1H), 3.43 – 3.31 (m, 3H), 2.83 – 2.76 (m, 1H), 2.46 (s, 3H), 0.26 (s, 9H).

$^{13}\text{C}$  NMR (100 MHz,  $\text{CDCl}_3$ )  $\delta$  (ppm) 145.5, 143.5, 141.7, 139.9, 134.5, 134.3, 133.3, 129.7, 127.5, 125.6, 116.7, 114.0, 52.2, 49.8, 45.8, 44.3, 21.5, -1.2.

**HRMS (ESI-TOF):**  $[\text{M}+\text{Na}]^{\oplus}$  calcd for  $\text{C}_{24}\text{H}_{31}\text{NNaO}_2\text{SSi}^{\oplus}$  448.1752, found 448.1752.

### 3-(1-(4-Phenoxyphenyl)vinyl)-1-tosyl-4-vinylpyrrolidine (3ah)

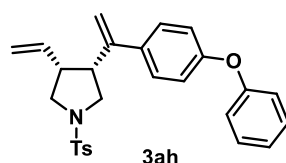

**Condition B**,  $R_f = 0.5$  (PE/EA = 10/1), colorless oil (50.9 mg, 57% yield).

$^1\text{H}$  NMR (600 MHz,  $\text{CDCl}_3$ )  $\delta$  (ppm) 7.77 (d,  $J = 8.2$  Hz, 2H), 7.37 – 7.32 (m, 4H), 7.22 – 7.07 (m, 3H), 7.04 – 6.97 (m, 2H), 6.93 – 6.90 (m, 2H), 5.29 – 5.21 (m, 2H), 4.85 (d,  $J = 1.3$  Hz, 1H), 4.81 (d,  $J = 10.4$  Hz, 1H), 4.61 (d,  $J = 17.1$  Hz, 1H), 3.67 (dd,  $J = 9.6$ , 6.9 Hz, 1H), 3.50 (dd,  $J = 10.2$ , 6.3 Hz, 1H), 3.40 (t,  $J = 9.5$  Hz, 1H), 3.35 (dd,  $J = 10.2$ , 2.9 Hz, 1H), 3.33 – 3.26 (m, 1H), 2.80 – 2.74 (m, 1H), 2.46 (s, 3H).

$^{13}\text{C}$  NMR (150 MHz,  $\text{CDCl}_3$ )  $\delta$  (ppm) 156.9, 156.8, 144.7, 143.5, 136.3, 134.4, 134.1, 129.8, 129.7, 127.7, 127.4, 123.5, 119.0, 118.4, 116.7, 113.4, 52.2, 49.7, 45.8, 44.3, 21.6.

**HRMS (ESI-TOF):**  $[\text{M}+\text{Na}]^{\oplus}$  calcd for  $\text{C}_{27}\text{H}_{27}\text{NNaO}_3\text{S}^{\oplus}$  468.1604, found 468.1623.

### Methyl 4'-(1-(1-tosyl-4-vinylpyrrolidin-3-yl)vinyl)-[1,1'-biphenyl]-4-carboxylate (3ai)

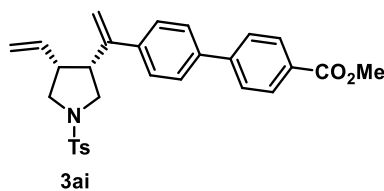

**Condition B**,  $R_f = 0.5$  (PE/EA = 10/1), white solid (40.2 mg, 41% yield).

$^1\text{H NMR}$  (600 MHz,  $\text{CDCl}_3$ )  $\delta$  (ppm) 8.12 – 8.07 (m, 2H), 7.78 (d,  $J = 8.2$  Hz, 2H), 7.66 – 7.63 (m, 2H), 7.58 – 7.55 (m, 2H), 7.37 (d,  $J = 8.0$  Hz, 2H), 7.34 – 7.32 (m, 2H), 5.34 (s, 1H), 5.30 – 5.22 (m, 1H), 4.94 (d,  $J = 1.3$  Hz, 1H), 4.82 (d,  $J = 10.5$  Hz, 1H), 4.64 – 4.59 (m, 1H), 3.94 (s, 3H), 3.70 (dd,  $J = 9.4, 6.7$  Hz, 1H), 3.52 (dd,  $J = 10.2, 6.3$  Hz, 1H), 3.44 (t,  $J = 9.4$  Hz, 1H), 3.40 – 3.35 (m, 2H), 2.84 – 2.77 (m, 1H), 2.47 (s, 3H).

$^{13}\text{C NMR}$  (100 MHz,  $\text{CDCl}_3$ )  $\delta$  (ppm) 166.9, 145.0, 144.8, 143.5, 141.2, 139.2, 134.4, 134.2, 130.1, 129.8, 129.0, 127.5, 127.1, 126.9, 126.8, 116.8, 114.4, 52.3, 52.1, 49.8, 45.7, 44.4, 21.6.

**HRMS (ESI-TOF)**:  $[\text{M}+\text{Na}]^{\oplus}$  calcd for  $\text{C}_{29}\text{H}_{29}\text{NNaO}_4\text{S}^{\oplus}$  510.1710, found 510.1719.

### 3-(1-(*m*-Tolyl)vinyl)-1-tosyl-4-vinylpyrrolidine (3aj)

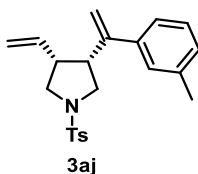

**Condition B**,  $R_f = 0.4$  (PE/EA = 10/1), colorless oil (42.7 mg, 58% yield).

$^1\text{H NMR}$  (600 MHz,  $\text{CDCl}_3$ )  $\delta$  (ppm) 7.77 (d,  $J = 8.2$  Hz, 2H), 7.36 (d,  $J = 7.9$  Hz, 2H), 7.19 – 6.99 (m, 4H), 5.31 – 5.20 (m, 2H), 4.88 – 4.78 (m, 2H), 4.61 (d,  $J = 17.2$  Hz, 1H), 3.66 (dd,  $J = 9.5, 6.9$  Hz, 1H), 3.49 (dd,  $J = 10.2, 6.3$  Hz, 1H), 3.43 – 3.27 (m, 3H), 2.80 – 2.7 (m, 1H), 2.46 (s, 3H), 2.32 (s, 3H).

$^{13}\text{C NMR}$  (150 MHz,  $\text{CDCl}_3$ )  $\delta$  (ppm) 145.6, 143.5, 141.4, 137.8, 134.5, 134.2, 129.7, 128.4, 128.2, 127.4, 127.0, 123.5, 116.6, 113.8, 52.2, 49.7, 45.8, 44.2, 21.6, 21.4.

**HRMS (ESI-TOF)**:  $[\text{M}+\text{Na}]^{\oplus}$  calcd for  $\text{C}_{22}\text{H}_{25}\text{NNaO}_2\text{S}^{\oplus}$  390.1498, found 390.1509.



**3-(1-(Naphthalen-2-yl)vinyl)-1-tosyl-4-vinylpyrrolidine (3ak)**

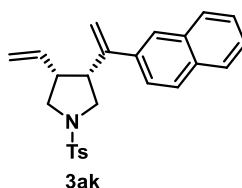

**Condition A**,  $R_f = 0.4$  (PE/EA = 10/1), white solid (59.3 mg, 74% yield).

$^1\text{H NMR}$  (400 MHz,  $\text{CDCl}_3$ )  $\delta$  (ppm) 7.84 – 7.62 (m, 6H), 7.49 – 7.43 (m, 2H), 7.41 – 7.33 (m, 3H), 5.40 (s, 1H), 5.34 – 5.21 (m, 1H), 4.98 (s, 1H), 4.79 (d,  $J = 10.4$  Hz, 1H), 4.56 (d,  $J = 17.1$  Hz, 1H), 3.76 – 3.68 (m, 1H), 3.58 – 3.44 (m, 3H), 3.41 – 3.32 (m, 1H), 2.86 – 2.77 (m, 1H), 2.47 (s, 3H).

$^{13}\text{C NMR}$  (150 MHz,  $\text{CDCl}_3$ )  $\delta$  (ppm) 145.5, 143.5, 138.7, 134.5, 134.3, 133.2, 132.8, 129.8, 128.04, 127.95, 127.54, 127.48, 126.3, 126.0, 125.0, 124.8, 116.8, 114.5, 52.3, 49.8, 45.8, 44.4, 21.6.

**HRMS (ESI-TOF)**:  $[\text{M}+\text{Na}]^{\oplus}$  calcd for  $\text{C}_{25}\text{H}_{25}\text{NNaO}_2\text{S}^{\oplus}$  426.1498, found 426.1508.

**3-(1-(2,3-Dihydrobenzo[*b*][1,4]dioxin-6-yl)vinyl)-1-tosyl-4-vinylpyrrolidine (3al)**

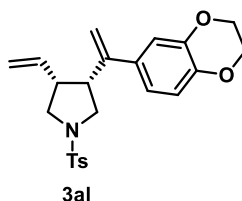

**Condition B**,  $R_f = 0.5$  (PE/EA = 10/1), white solid (32.3 mg, 39% yield).

$^1\text{H NMR}$  (600 MHz,  $\text{CDCl}_3$ )  $\delta$  (ppm) 7.79 – 7.74 (m, 2H), 7.35 (d,  $J = 7.9$  Hz, 2H), 6.81 – 6.70 (m, 3H), 5.29 – 5.22 (m, 1H), 5.19 (s, 1H), 4.82 (d,  $J = 10.5$  Hz, 1H), 4.78 (d,  $J = 1.3$  Hz, 1H), 4.63 (dt,  $J = 17.2, 1.2$  Hz, 1H), 4.25 (s, 4H), 3.64 (dd,  $J = 9.7, 7.0$  Hz, 1H), 3.47 (dd,  $J = 10.2, 6.3$  Hz, 1H), 3.40 – 3.34 (m, 2H), 3.25 – 3.18 (m, 1H), 2.81 – 2.74 (m, 1H), 2.46 (s, 3H).

$^{13}\text{C NMR}$  (150 MHz,  $\text{CDCl}_3$ )  $\delta$  (ppm) 144.5, 143.5, 143.2, 143.1, 134.9, 134.5, 134.1, 129.7, 127.4, 119.5, 117.0, 116.6, 115.1, 112.9, 64.4, 64.3, 52.2, 49.6, 45.7, 44.2, 21.6.

**HRMS (ESI-TOF)**:  $[\text{M}+\text{Na}]^{\oplus}$  calcd for  $\text{C}_{23}\text{H}_{25}\text{NNaO}_4\text{S}^{\oplus}$  434.1397, found 434.1405.

**1-((4-Methoxyphenyl)sulfonyl)-3-(1-phenylvinyl)-4-vinylpyrrolidine (3ba)**

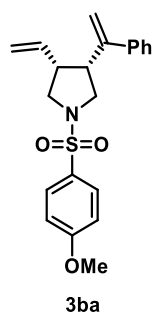

**Condition B**,  $R_f = 0.2$  (PE/EA = 10/1), colorless oil (60.7 mg, 82% yield).

$^1\text{H NMR}$  (600 MHz,  $\text{CDCl}_3$ )  $\delta$  (ppm) 7.87 – 7.77 (m, 2H), 7.31 – 7.26 (m, 3H), 7.24 – 7.21 (m, 2H), 7.05 – 7.00 (m, 2H), 5.31 – 5.22 (m, 2H), 4.88 (d,  $J = 1.3$  Hz, 1H), 4.81 (d,  $J = 10.4$  Hz, 1H), 4.59 (d,  $J = 17.1$  Hz, 1H), 3.89 (s, 3H), 3.66 (dd,  $J = 9.4$ , 6.8 Hz, 1H), 3.49 (dd,  $J = 10.2$ , 6.3 Hz, 1H), 3.40 (t,  $J = 9.5$  Hz, 1H), 3.38 – 3.30 (m, 2H), 2.80 – 2.74 (m, 1H).

$^{13}\text{C NMR}$  (150 MHz,  $\text{CDCl}_3$ )  $\delta$  (ppm) 163.0, 145.7, 141.5, 134.6, 129.6, 129.3, 128.3, 127.6, 126.4, 116.7, 114.3, 114.0, 55.6, 52.4, 49.8, 46.0, 44.4.

**HRMS (ESI-TOF)**:  $[\text{M}+\text{Na}]^{\oplus}$  calcd for  $\text{C}_{21}\text{H}_{23}\text{NNaO}_3\text{S}^{\oplus}$  392.1291, found 392.1301.

**1-((4-Fluorophenyl)sulfonyl)-3-(1-phenylvinyl)-4-vinylpyrrolidine (3ca)**

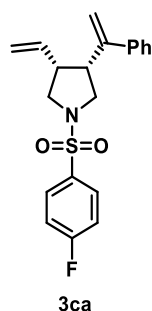

**Condition A**,  $R_f = 0.4$  (PE/EA = 10/1), white solid (53.9 mg, 76% yield).

$^1\text{H NMR}$  (600 MHz,  $\text{CDCl}_3$ )  $\delta$  (ppm) 7.99 – 7.86 (m, 2H), 7.31 – 7.21 (m, 7H), 5.31 – 5.21 (m, 2H), 4.88 (s, 1H), 4.83 (d,  $J = 10.4$  Hz, 1H), 4.60 (d,  $J = 17.1$  Hz, 1H), 3.68 (dd,  $J = 8.8$ , 6.3 Hz, 1H), 3.50 (dd,  $J = 10.2$ , 6.3 Hz, 1H), 3.43 – 3.32 (m, 3H), 2.83 – 2.72 (m, 1H).

<sup>13</sup>C NMR (100 MHz, CDCl<sub>3</sub>) δ (ppm) 165.2 (d, *J* = 253.2 Hz), 145.4, 141.3, 134.2, 133.5 (d, *J* = 3.4 Hz), 130.0 (d, *J* = 9.1 Hz), 128.3, 127.7, 126.4, 116.9, 116.4 (d, *J* = 22.3 Hz), 114.0, 52.3, 49.7, 45.9, 44.2.

<sup>19</sup>F NMR (376 MHz, CDCl<sub>3</sub>) δ (ppm) -105.2.

HRMS (ESI-TOF): [M+Na]<sup>+</sup> calcd for C<sub>20</sub>H<sub>20</sub>FNNaO<sub>2</sub>S<sup>+</sup> 380.1091, found 380.1098.

**1-((4-Chlorophenyl)sulfonyl)-3-(1-phenylvinyl)-4-vinylpyrrolidine (3da)**

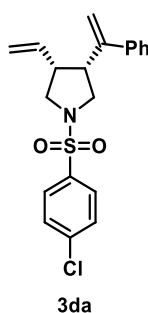

**Condition B**, *R<sub>f</sub>* = 0.4 (PE/EA = 10/1), white solid (59.8 mg, 80% yield).

<sup>1</sup>H NMR (600 MHz, CDCl<sub>3</sub>) δ (ppm) 7.85 – 7.80 (m, 2H), 7.57 – 7.50 (m, 2H), 7.32 – 7.26 (m, 3H), 7.24 – 7.21 (m, 2H), 5.32 – 5.22 (m, 2H), 4.88 (d, *J* = 1.4 Hz, 1H), 4.84 (d, *J* = 10.4 Hz, 1H), 4.61 (d, *J* = 17.1 Hz, 1H), 3.67 (dd, *J* = 9.3, 6.7 Hz, 1H), 3.49 (dd, *J* = 10.2, 6.3 Hz, 1H), 3.42 (t, *J* = 9.4 Hz, 1H), 3.39 – 3.34 (m, 2H), 2.81 – 2.76 (m, 1H).

<sup>13</sup>C NMR (150 MHz, CDCl<sub>3</sub>) δ (ppm) 145.4, 141.3, 139.2, 135.9, 134.2, 129.4, 128.8, 128.3, 127.7, 126.4, 116.9, 114.1, 52.3, 49.7, 45.9, 44.2.

HRMS (ESI-TOF): [M+Na]<sup>+</sup> calcd for C<sub>20</sub>H<sub>20</sub>ClNNaO<sub>2</sub>S<sup>+</sup> 396.0795, found 396.0805.

**1-((4-Bromophenyl)sulfonyl)-3-(1-phenylvinyl)-4-vinylpyrrolidine (3ea)**

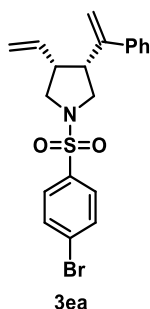

**Condition B**,  $R_f = 0.4$  (PE/EA = 10/1), white solid (67.3 mg, 81% yield).

$^1\text{H NMR}$  (600 MHz,  $\text{CDCl}_3$ )  $\delta$  (ppm) 7.78 – 7.72 (m, 2H), 7.72 – 7.68 (m, 2H), 7.32 – 7.21 (m, 5H), 5.32 – 5.22 (m, 2H), 4.88 (d,  $J = 1.5$  Hz, 1H), 4.84 (d,  $J = 10.4$  Hz, 1H), 4.61 (dt,  $J = 17.1, 1.1$  Hz, 1H), 3.67 (dd,  $J = 9.3, 6.7$  Hz, 1H), 3.49 (dd,  $J = 10.2, 6.2$  Hz, 1H), 3.42 (t,  $J = 9.4$  Hz, 1H), 3.39 – 3.32 (m, 2H), 2.83 – 2.72 (m, 1H).

$^{13}\text{C NMR}$  (100MHz,  $\text{CDCl}_3$ )  $\delta$  (ppm) 145.4, 141.3, 136.4, 134.2, 132.4, 128.8, 128.3, 127.7, 126.4, 116.9, 114.1, 52.3, 49.7, 45.9, 44.2.

**HRMS (ESI-TOF)**:  $[\text{M}+\text{Na}]^{\oplus}$  calcd for  $\text{C}_{20}\text{H}_{20}^{79}\text{BrNNaO}_2\text{S}^{\oplus}$  440.0290, found 440.0297.

**Methyl 4-((3-(1-phenylvinyl)-4-vinylpyrrolidin-1-yl)sulfonyl)benzoate (3fa)**

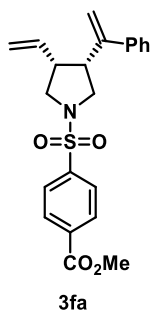

**Condition B**,  $R_f = 0.2$  (PE/EA = 10/1), white solid (60.6 mg, 76 % yield).

$^1\text{H NMR}$  (600 MHz,  $\text{CDCl}_3$ )  $\delta$  (ppm) 8.24 – 8.18 (m, 2H), 7.98 – 7.91 (m, 2H), 7.30 – 7.25 (m, 3H), 7.23 – 7.20 (m, 2H), 5.31 – 5.21 (m, 2H), 4.87 (d,  $J = 1.4$  Hz, 1H), 4.82 (d,  $J = 10.4$  Hz, 1H), 4.61 (d,  $J = 17.1$  Hz, 1H), 3.97 (s, 3H), 3.70 (dd,  $J = 9.5, 6.9$  Hz, 1H), 3.52 (dd,  $J = 10.2, 6.3$  Hz, 1H), 3.43 (t,  $J = 9.5$  Hz, 1H), 3.40 – 3.32 (m, 2H), 2.84 – 2.78 (m, 1H).

$^{13}\text{C}$  NMR (150 MHz,  $\text{CDCl}_3$ )  $\delta$  (ppm) 165.7, 145.3, 141.23, 141.21, 134.1, 133.9, 130.4, 128.3, 127.7, 127.3, 126.4, 117.0, 114.1, 52.7, 52.3, 49.7, 45.9, 44.2.

HRMS (ESI-TOF):  $[\text{M}+\text{Na}]^{\oplus}$  calcd for  $\text{C}_{22}\text{H}_{23}\text{NNaO}_4\text{S}^{\oplus}$  420.1240, found 420.1252.

**1-((4-Nitrophenyl)sulfonyl)-3-(1-phenylvinyl)-4-vinylpyrrolidine (3ga)**

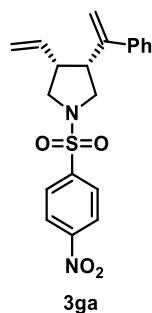

**Condition A**,  $R_f = 0.3$  (PE/EA = 10/1), white solid (59.7 mg, 78% yield).

$^1\text{H}$  NMR (600 MHz,  $\text{CDCl}_3$ )  $\delta$  (ppm) 8.47 – 8.37 (m, 2H), 8.11 – 8.03 (m, 2H), 7.32 – 7.26 (m, 3H), 7.25 – 7.21 (m, 2H), 5.32 – 5.22 (m, 2H), 4.88 (d,  $J = 1.4$  Hz, 1H), 4.85 (d,  $J = 10.5$  Hz, 1H), 4.63 (d,  $J = 17.2$  Hz, 1H), 3.72 (dd,  $J = 9.3, 6.8$  Hz, 1H), 3.53 (dd,  $J = 10.2, 6.2$  Hz, 1H), 3.48 – 3.38 (m, 3H), 2.85 – 2.79 (m, 1H).

$^{13}\text{C}$  NMR (150 MHz,  $\text{CDCl}_3$ )  $\delta$  (ppm) 150.1, 145.2, 143.4, 141.1, 133.8, 128.42, 128.38, 127.8, 126.4, 124.4, 117.2, 114.2, 52.4, 49.7, 45.9, 44.1.

HRMS (ESI-TOF):  $[\text{M}+\text{H}]^{\oplus}$  calcd for  $\text{C}_{20}\text{H}_{21}\text{N}_2\text{O}_4\text{S}^{\oplus}$  385.1217, found 385.1224.

**3-(1-Phenylvinyl)-1-(thiophen-2-ylsulfonyl)-4-vinylpyrrolidine (3ha)**

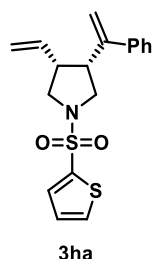

**Condition A**,  $R_f = 0.3$  (PE/EA = 10/1), colorless oil (51.7 mg, 75% yield).

$^1\text{H}$  NMR (600 MHz,  $\text{CDCl}_3$ )  $\delta$  (ppm) 7.67 – 7.60 (m, 2H), 7.31 – 7.17 (m, 6H), 5.31 – 5.20 (m, 2H), 4.91 (d,  $J = 1.5$  Hz, 1H), 4.83 (d,  $J = 10.4$  Hz, 1H), 4.60 (dt,  $J = 17.2, 1.1$  Hz, 1H), 3.72 (dd,  $J = 9.8, 7.0$  Hz, 1H), 3.54 (dd,  $J = 10.4, 6.3$  Hz, 1H), 3.48 (t,  $J$

= 9.8 Hz, 1H), 3.40 (dd,  $J$  = 10.4, 2.7 Hz, 1H), 3.38 – 3.33 (m, 1H), 2.81 - 2.75 (m, 1H).

$^{13}\text{C}$  NMR (100 MHz,  $\text{CDCl}_3$ )  $\delta$  (ppm) 145.4, 141.3, 137.1, 134.2, 132.1, 131.7, 128.3, 127.7, 127.6, 126.4, 116.8, 114.1, 52.5, 49.9, 45.9, 44.3.

**HRMS (ESI-TOF):**  $[\text{M}+\text{Na}]^{\oplus}$  calcd for  $\text{C}_{18}\text{H}_{19}\text{NNaO}_2\text{S}_2^{\oplus}$  368.0749, found 368.0757.

### 1-(Methylsulfonyl)-3-(1-phenylvinyl)-4-vinylpyrrolidine (3ia)

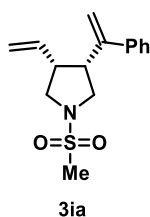

**Condition B**,  $R_f$  = 0.3 (PE/EA = 10/1), white solid (50.1 mg, 90% yield).

$^1\text{H}$  NMR (600 MHz,  $\text{CDCl}_3$ )  $\delta$  (ppm) 7.36 – 7.27 (m, 5H), 5.65 - 5.54 (m, 1H), 5.34 (s, 1H), 5.03 – 4.99 (m, 2H), 4.84 (dt,  $J$  = 17.1, 1.1 Hz, 1H), 3.72 (dd,  $J$  = 8.8, 6.2 Hz, 1H), 3.61 – 3.54 (m, 2H), 3.54 – 3.50 (m, 1H), 3.44 (dd,  $J$  = 10.1, 2.6 Hz, 1H), 2.96 – 2.91 (m, 1H), 2.90 (s, 3H).

$^{13}\text{C}$  NMR (100 MHz,  $\text{CDCl}_3$ )  $\delta$  (ppm) 145.4, 141.4, 134.4, 128.4, 127.7, 126.5, 117.1, 114.2, 52.3, 49.5, 46.3, 44.4, 35.6.

**HRMS (ESI-TOF):**  $[\text{M}+\text{Na}]^{\oplus}$  calcd for  $\text{C}_{15}\text{H}_{19}\text{NNaO}_2\text{S}^{\oplus}$  300.1029, found 300.1036.

### Phenyl(3-(1-phenylvinyl)-4-vinylpyrrolidin-1-yl)methanone (3ja)

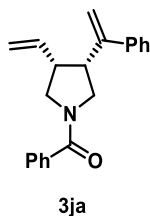

**Condition B**,  $R_f$  = 0.3 (PE/EA = 10/1), white solid (32.3 mg, 53% yield).

$^1\text{H}$  NMR (600 MHz,  $\text{CDCl}_3$ )  $\delta$  (ppm) 7.59 – 7.26 (m, 10H), 5.68 – 5.50 (m, 1H), 5.39 – 5.27 (m, 1H), 5.14 – 4.68 (m, 3H), 4.08 – 3.75 (m, 2H), 3.74 – 3.58 (m, 2H), 3.53 – 3.42 (m, 1H), 3.03 – 2.81 (m, 1H).

$^{13}\text{C}$  NMR (150 MHz,  $\text{CDCl}_3$ )  $\delta$  (ppm) 170.0, 146.1, 141.8, 136.8, 134.9, 130.0, 128.4, 128.3, 127.6, 127.1, 126.5, 116.6, 113.9, 52.8, 49.5, 45.8, 43.9.

HRMS (ESI-TOF):  $[\text{M}+\text{Na}]^{\oplus}$  calcd for  $\text{C}_{21}\text{H}_{21}\text{NNaO}^{\oplus}$  326.1515, found 326.1522.

### Benzyl 3-(1-phenylvinyl)-4-vinylpyrrolidine-1-carboxylate (3ka)

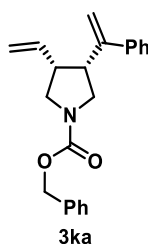

**Condition A**,  $R_f$  = 0.4 (PE/EA = 10/1), colorless oil (29.2 mg, 44% yield).

$^1\text{H}$  NMR (600 MHz,  $\text{CDCl}_3$ )  $\delta$  (ppm) 7.42 – 7.33 (m, 4H), 7.33 – 7.26 (m, 6H), 5.62 – 5.53 (m, 1H), 5.34 – 5.29 (m, 1H), 5.24 – 5.13 (m, 2H), 5.03 – 4.90 (m, 2H), 4.83 – 4.72 (m, 1H), 3.85 – 3.74 (m, 1H), 3.65 – 3.42 (m, 4H), 2.90 – 2.81 (m, 1H).

$^{13}\text{C}$  NMR (100 MHz,  $\text{CDCl}_3$ )  $\delta$  (ppm) 154.9, 146.1, 141.8, 136.9, 135.1, 128.5, 127.9, 127.8, 127.6, 126.5, 116.3, 113.8, 66.8, 50.8, 50.7, 48.1, 45.6, 43.9.

HRMS (ESI-TOF):  $[\text{M}+\text{Na}]^{\oplus}$  calcd for  $\text{C}_{22}\text{H}_{23}\text{NNaO}_2^{\oplus}$  356.1621, found 356.1628.

### 1-(4-((3-(1-Phenylvinyl)-4-vinylpyrrolidin-1-yl)sulfonyl)phenyl)-5-(p-tolyl)-3-(trifluoromethyl)-1H-pyrazole (3qa)

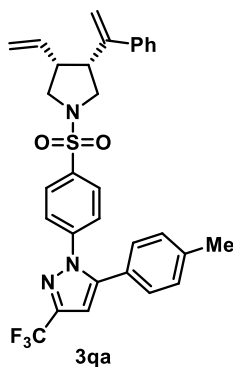

**Condition B**,  $R_f = 0.4$  (PE/EA = 10/1), colorless oil (56.9 mg, 51% yield).

**$^1\text{H}$  NMR** (600 MHz,  $\text{CDCl}_3$ )  $\delta$  (ppm) 7.90 – 7.84 (m, 2H), 7.54 – 7.50 (m, 2H), 7.32 – 7.26 (m, 3H), 7.25 – 7.22 (m, 2H), 7.17 (d,  $J = 7.9$  Hz, 2H), 7.10 (d,  $J = 8.1$  Hz, 2H), 6.76 (s, 1H), 5.31 – 5.23 (m, 2H), 4.89 – 4.82 (m, 2H), 4.63 (d,  $J = 17.1$  Hz, 1H), 3.66 (dd,  $J = 9.2, 6.6$  Hz, 1H), 3.48 (dd,  $J = 10.2, 6.3$  Hz, 1H), 3.43 – 3.32 (m, 3H), 2.82 – 2.73 (m, 1H), 2.37 (s, 3H).

**$^{13}\text{C}$  NMR** (150 MHz,  $\text{CDCl}_3$ )  $\delta$  (ppm) 145.4, 145.3, 144.1 (q,  $J = 38.2$  Hz), 142.6, 141.2, 139.8, 136.8, 134.1, 129.7, 128.7, 128.4, 128.3, 127.7, 126.4, 125.7, 125.6, 121.0 (q,  $J = 267.9$  Hz), 117.0, 114.0, 106.3, 52.4, 49.7, 45.9, 44.2, 21.3.

**$^{19}\text{F}$  NMR** (376 MHz,  $\text{CDCl}_3$ )  $\delta$  (ppm) -62.4.

**HRMS (ESI-TOF)**:  $[\text{M}+\text{Na}]^{\oplus}$  calcd for  $\text{C}_{31}\text{H}_{28}\text{F}_3\text{N}_3\text{NaO}_2\text{S}^{\oplus}$  586.1747, found 586.1754.



## 4. X-ray Crystal Structure of 3ga

The structure of product **3ga** was determined by X-ray diffraction. The X-ray crystallography data have been deposited in Cambridge Crystallography Data Center (CCDC 2355016). The structure of other products was assumed by analogy.

The single crystal sample for X-ray analysis was obtained by recrystallization from a mixed solvent of ethyl acetate and petroleum ether by slow evaporation. A suitable crystal was selected and the data were collected on a d8 venture system (Cu  $k\alpha$ ,  $\lambda = 1.54178$  Å). The crystal was kept at 298(2) K during data collection.

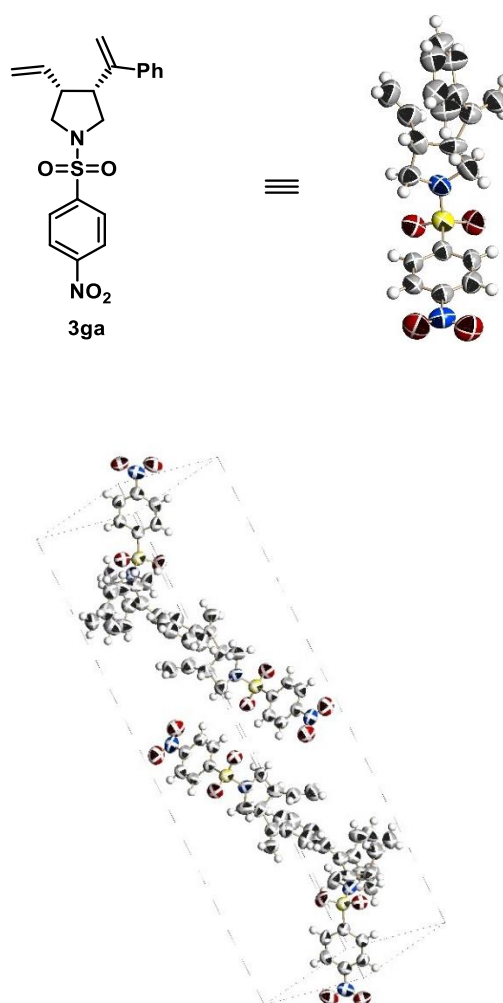

Figure S1. Thermal ellipsoids are shown at 50% probability for **3ga**

**Table S1. Crystal data and structure refinement for 3ga.**

|                                     |                                                                |                              |
|-------------------------------------|----------------------------------------------------------------|------------------------------|
| Identification code                 | <b>3ga</b>                                                     |                              |
| Chemical formula                    | $\text{C}_{20}\text{H}_{20}\text{N}_2\text{O}_4\text{S}$       |                              |
| Formula weight                      | 384.44 g/mol                                                   |                              |
| Temperature                         | 298(2) K                                                       |                              |
| Wavelength                          | 1.54178 Å                                                      |                              |
| Crystal system                      | monoclinic                                                     |                              |
| Space group                         | P 1 21/c 1                                                     |                              |
| Unit cell dimensions                | $a = 8.2866(2) \text{ Å}$                                      | $\alpha = 90^\circ$          |
|                                     | $b = 34.0670(8) \text{ Å}$                                     | $\beta = 110.1470(10)^\circ$ |
|                                     | $c = 7.2733(2) \text{ Å}$                                      | $\gamma = 90^\circ$          |
| Volume                              | $1927.62(8) \text{ Å}^3$                                       |                              |
| Z                                   | 4                                                              |                              |
| Density (calculated)                | $1.325 \text{ g/cm}^3$                                         |                              |
| Absorption coefficient              | $1.731 \text{ mm}^{-1}$                                        |                              |
| F(000)                              | 808                                                            |                              |
| Diffractometer                      | d8 venture                                                     |                              |
| Theta range for data collection     | 2.59 to $65.19^\circ$                                          |                              |
| Index ranges                        | $-9 \leq h \leq 9$ , $-40 \leq k \leq 40$ , $-8 \leq l \leq 8$ |                              |
| Reflections collected               | 36354                                                          |                              |
| Independent reflections             | 3299 [R(int) = 0.0881]                                         |                              |
| Coverage of independent reflections | 99.8%                                                          |                              |
| Absorption correction               | Multi-Scan                                                     |                              |
| Structure solution technique        | direct methods                                                 |                              |

|                                   |                                                                                             |
|-----------------------------------|---------------------------------------------------------------------------------------------|
| Structure solution program        | SHELXT 2018/2 (Sheldrick, 2018)                                                             |
| Refinement method                 | Full-matrix least-squares on F <sup>2</sup>                                                 |
| Refinement program                | SHELXL-2018/3 (Sheldrick, 2018)                                                             |
| Function minimized                | $\Sigma w(F_o^2 - F_c^2)^2$                                                                 |
| Data / restraints / parameters    | 3299 / 0 / 244                                                                              |
| Goodness-of-fit on F <sup>2</sup> | 1.061                                                                                       |
| $\Delta/\sigma_{\max}$            | 0.004                                                                                       |
| Final R indices                   | 2039 data; $I > 2\sigma(I)$ R1 = 0.1037, wR2 = 0.2767<br>all data R1 = 0.1513, wR2 = 0.3121 |
| Weighting scheme                  | $w = 1/[\sigma^2(F_o^2) + (0.1411P)^2 + 3.1967P]$<br>where $P = (F_o^2 + 2F_c^2)/3$         |
| Largest diff. peak and hole       | 0.755 and -0.299 eÅ <sup>-3</sup>                                                           |
| R.M.S. deviation from mean        | 0.070 eÅ <sup>-3</sup>                                                                      |

## 5. Scale-up Reaction and Product Transformations

### 2.0-mmol Scale Reaction

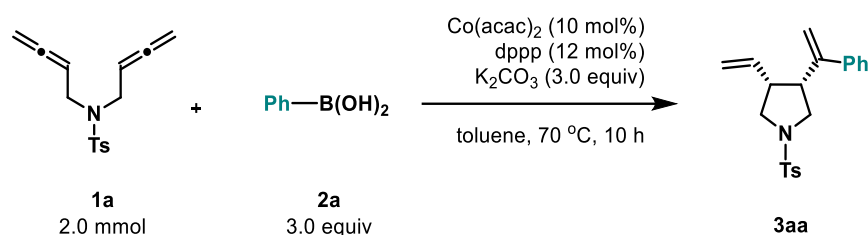

In a glove box, a 100-mL oven-dried Schlenk flask was charged with bisallene **1a** (550 mg, 2.0 mmol, 1.0 equiv), phenylboronic acid **2a** (732 mg, 6.0 mmol, 3.0 equiv), and K<sub>2</sub>CO<sub>3</sub> (828 mg, 6.0 mmol, 3.0 equiv), Co(acac)<sub>2</sub> (52 mg, 0.2 mmol, 0.1 equiv), dppp (100 mg, 0.24 mmol, 0.12 equiv) and toluene (20 mL). The flask was capped and removed from the glove box. The reaction mixture was placed in a pre-heated oil bath and stirred at 70 °C for 10 h. Then the reaction mixture was cooled to room temperature and concentrated *in vacuo*. The residue was purified by silica gel flash column chromatography to afford the product **3aa** as a yellow oil (eluent: PE/EA = 10:1, 537.5 mg, 76% yield).

### Product Transformation

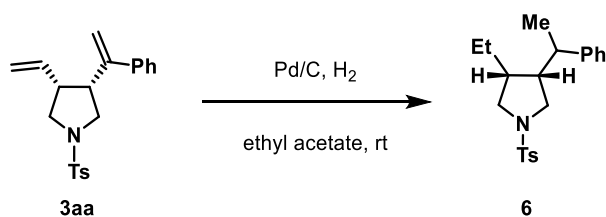

**3-Ethyl-4-1-phenylethyl-1-tosylpyrrolidine (6)** An oven-dried 10-mL flask charged with **3aa** (70.6 mg, 0.2 mmol) and 10% Pd/C (7 mg) was evacuated and backfilled with H<sub>2</sub> for three times. Then ethyl acetate (5 mL) was added and the mixture was stirred at room temperature under a hydrogen atmosphere for 5 h. When the reaction was completed as monitored by TLC, ethyl acetate was added, and then the mixture was passed through a membrane filter. After filtration and concentrated *in vacuo*, the residue was purified by silica gel flash

column chromatography to afford the product **6** as a colorless oil (eluent: PE/EA = 10:1, 51.9 mg, 73% yield, dr = 15:1).

$^1\text{H}$  NMR (600 MHz,  $\text{CDCl}_3$ )  $\delta$  (ppm) 7.64 – 7.59 (m, 2H), 7.31 – 7.19 (m, 5H), 7.09 – 7.05 (m, 2H), 3.43 (d,  $J$  = 10.3 Hz, 1H), 3.24 – 3.19 (m, 1H), 2.91 – 2.86 (m, 1H), 2.72 – 2.66 (m, 1H), 2.57 – 2.50 (m, 1H), 2.43 (s, 3H), 2.19 – 2.10 (m, 1H), 2.04 – 1.97 (m, 1H), 1.46 – 1.35 (m, 1H), 1.17 (d,  $J$  = 6.8 Hz, 3H), 0.84 (t,  $J$  = 7.3 Hz, 3H), 0.74 – 0.64 (m, 1H).

$^{13}\text{C}$  NMR (150 MHz,  $\text{CDCl}_3$ )  $\delta$  (ppm) 145.3, 143.1, 134.2, 129.5, 128.6, 127.2, 126.7, 126.6, 51.8, 50.3, 49.5, 41.4, 38.8, 21.5, 20.6, 18.1, 12.2.

HRMS (ESI-TOF):  $[\text{M}+\text{Na}]^{\oplus}$  calcd for  $\text{C}_{21}\text{H}_{27}\text{NNaO}_2\text{S}^{\oplus}$  380.1655, found 380.1664.

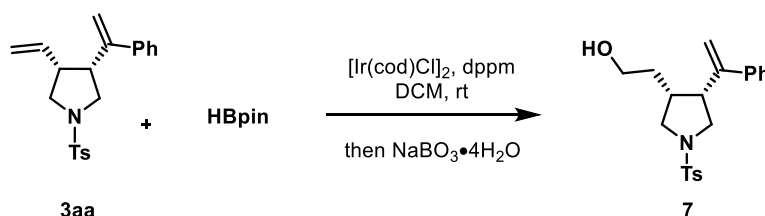

**2-(4-(1-Phenylvinyl)-1-tosylpyrrolidin-3-yl) ethan-1-ol (7)** In a glove box,  $[\text{Ir}(\text{cod})\text{Cl}]_2$  (6.7 mg, 0.01 mmol), bis(diphenylphosphino)methane (dppm) (7.7 mg, 0.02 mmol), and dichloromethane (1.0 mL) were added to a 4 mL vial containing a magnetic stir bar, and the mixture was stirred at room temperature for 30 min. A solution of **3aa** (70.6 mg, 0.2 mmol) and HBpin (127.9 mg, 1.0 mmol) in dichloromethane (1.0 mL) was added, and the vial sealed with a plastic cap. The mixture was stirred at room temperature overnight. The reaction mixture was concentrated when the reaction was completed as monitored by TLC. Then the  $\text{NaBO}_3 \cdot 4\text{H}_2\text{O}$  (153 mg, 1.5 mmol) and THF/ $\text{H}_2\text{O}$  (1 mL/1 mL) were added to the mixture. After the mixture was stirred for 4 h, followed by the addition of  $\text{H}_2\text{O}$ . The reaction mixture was extracted with ethyl acetate ( $3 \times 10$  mL), dried over  $\text{Na}_2\text{SO}_4$ , and concentrated *in vacuo*. The residue was purified by silica gel flash column chromatography to afford the product **7** as a colorless oil (eluent: PE/EA = 10:1 to 5:1, 37.8 mg, 51% yield).

**<sup>1</sup>H NMR** (600 MHz, CDCl<sub>3</sub>) δ (ppm) 7.77 (d, *J* = 7.9 Hz, 2H), 7.35 (d, *J* = 7.9 Hz, 2H), 7.34 – 7.26 (m, 5H), 5.32 (s, 1H), 4.92 (s, 1H), 3.62 (t, *J* = 8.3 Hz, 1H), 3.46 – 3.38 (m, 2H), 3.37 – 3.28 (m, 3H), 3.27 – 3.20 (m, 1H), 2.45 (s, 3H), 2.26 – 2.16 (m, 1H), 1.29 – 1.22 (m, 1H), 0.99 – 0.78 (m, 2H).

**<sup>13</sup>C NMR** (150 MHz, CDCl<sub>3</sub>) δ (ppm) 146.0, 143.5, 141.5, 134.1, 129.7, 128.5, 127.8, 127.4, 126.2, 114.5, 60.9, 51.9, 50.0, 45.4, 37.3, 30.2, 21.5.

**HRMS (ESI-TOF):** [M+H]<sup>+</sup> calcd for C<sub>21</sub>H<sub>26</sub>NO<sub>3</sub>S<sup>+</sup> 372.1628, found 372.1634.

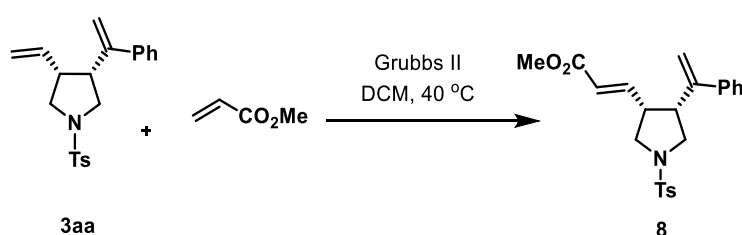

**Methyl (*E*)-3-(4-(1-phenylvinyl)-1-tosylpyrrolidin-3-yl)acrylate (8)** An oven-dried 10-mL flask charged with **3aa** (35.3 mg, 0.1 mmol) and Grubbs catalyst II (25.5 mg, 0.03 mmol) was evacuated and backfilled with N<sub>2</sub> for three times. Then methyl acrylate (300.2 μL, 3.33 mmol) and CH<sub>2</sub>Cl<sub>2</sub> (0.5 mL) were added and the reaction mixture was stirred at 40 °C for 24 h. Next, the mixture was concentrated *in vacuo* and the residue was purified by silica gel flash column chromatography to afford the product **8** as a brown oil (eluent: PE/EA = 10:1, 16.6 mg, 40% yield).

**<sup>1</sup>H NMR** (600 MHz, CDCl<sub>3</sub>) δ (ppm) 7.77 (d, *J* = 8.1 Hz, 2H), 7.37 (d, *J* = 8.0 Hz, 2H), 7.31 – 7.27 (m, 3H), 7.19 (d, *J* = 6.7 Hz, 2H), 6.38 – 6.31 (m, 1H), 5.31 – 5.25 (m, 2H), 4.90 (s, 1H), 3.75 – 3.71 (m, 1H), 3.65 (s, 3H), 3.56 – 3.51 (m, 1H), 3.47 – 3.41 (m, 2H), 3.34 (dd, *J* = 10.5, 2.4 Hz, 1H), 2.93 – 2.88 (m, 1H), 2.47 (s, 3H).

**<sup>13</sup>C NMR** (150 MHz, CDCl<sub>3</sub>) δ (ppm) 166.0, 144.6, 144.5, 143.9, 140.9, 133.7, 129.9, 128.5, 127.9, 127.4, 126.3, 122.6, 114.6, 51.9, 51.5, 49.5, 46.0, 42.9, 21.6.

**HRMS (ESI-TOF):** [M+H]<sup>+</sup> calcd for C<sub>23</sub>H<sub>26</sub>NO<sub>4</sub>S<sup>+</sup> 412.1577, found 412.1582.

## 6. Mechanistic Experiments and Possible Catalytic Cycle

### *Mechanistic Experiments:*

In a glove box, an oven-dried 4-mL vial was charged with bisallene **1a** (0.05 mmol, 1.0 equiv), phenyl boronic acid **2a** (0.15 mmol, 3.0 equiv), K<sub>2</sub>CO<sub>3</sub> (0.15 mmol, 3.0 equiv), catalyst (10 mol% base on metal), dppp, additive, and toluene (0.5 mL). The vial was capped and removed from the glove box. The reaction mixture was stirred at 70 °C for 10 h. Then the reaction mixture was cooled to room temperature, diluted with H<sub>2</sub>O (5 mL), and extracted with EtOAc (5 mL × 3). The combined organic layers were washed with brine (10 mL), dried over Na<sub>2</sub>SO<sub>4</sub>, and concentrated *in vacuo*. Finally, the residue was determined by <sup>1</sup>H NMR analysis with CH<sub>2</sub>Br<sub>2</sub> as an internal standard.

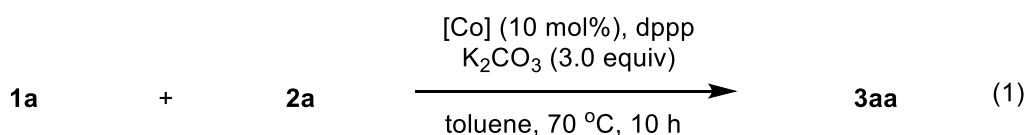

CoCl<sub>2</sub> (10 mol%) + dppp (12 mol%): 14% yield  
 CoCl<sub>2</sub>(PPh<sub>3</sub>)<sub>2</sub> (10 mol%): 0% yield  
 CoCl(PPh<sub>3</sub>)<sub>3</sub> (10 mol%): 0% yield  
 CoCl<sub>2</sub>(PPh<sub>3</sub>)<sub>2</sub> (10 mol%) + dppp (40 mol%): 30% yield  
 CoCl(PPh<sub>3</sub>)<sub>3</sub> (10 mol%) + dppp (40 mol%): 31% yield

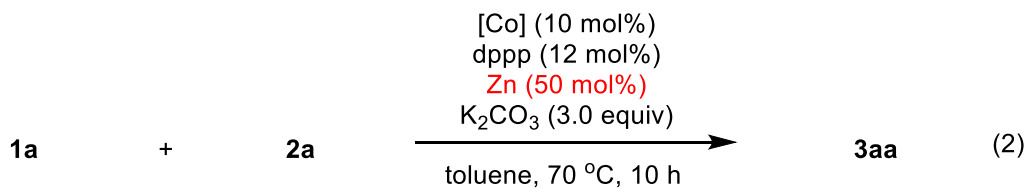

CoCl<sub>2</sub>: 23% yield  
 Co(acac)<sub>2</sub>: 55% yield

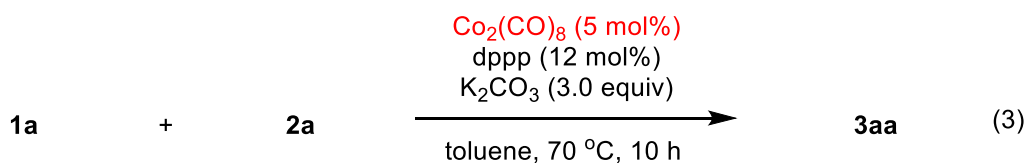

0% yield

### Possible Catalytic Cycle:

In light of the excellent regio- and diastereoselectivities observed in this reaction, along with the mechanistic studies, a potential catalytic cycle involving Co(I)/Co(III) is proposed. At first, with the assistance of boronic acid, Co(II) is reduced to Co(I), which is regarded as the catalytically active species of this reaction. Next, this Co(I) complex undergoes oxidative cyclometalation with bisallene **1a** to afford the Co(III) complex **II**, which subsequently proceeds transmetalation with phenyl boronic acid to yield the cobalt complex **III**. Then, the cobalt complex **III** undergoes reductive elimination to form the Co(I) complex **IV**. Finally, the protonation of Co(I) complex **IV** results in the formation of *cis* five-membered ring product **3aa** and the regeneration of Co(I) complex **I**.

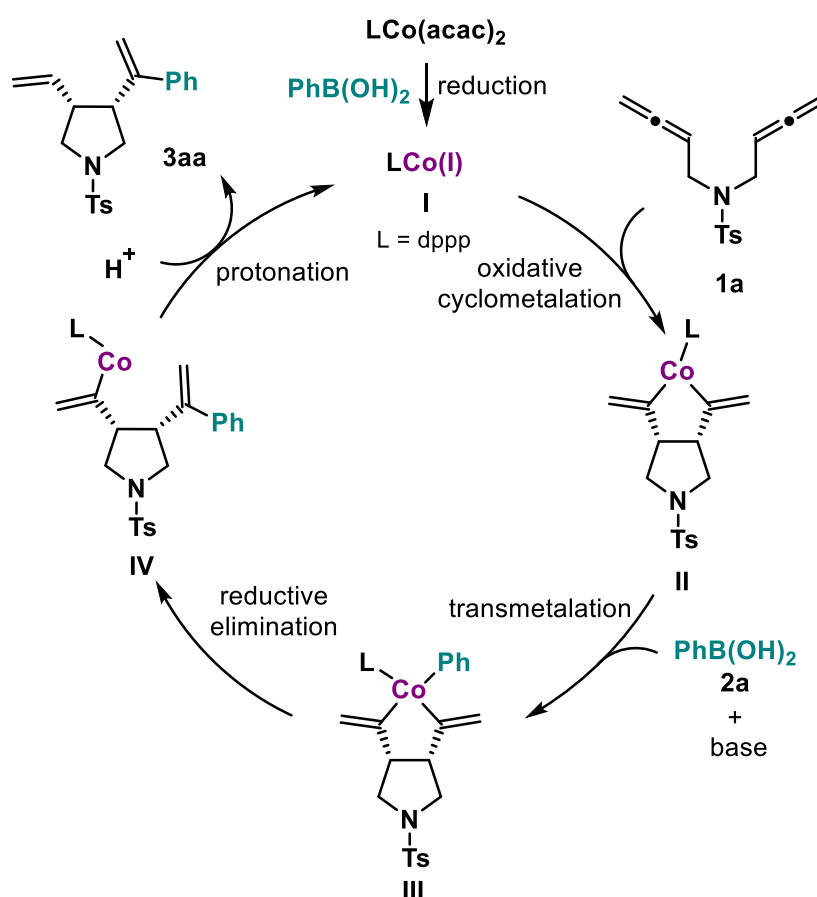

Apart from the Co(I)/Co(III) catalytic cycle, the stepwise arylation cyclization process involving Co(I) cannot be excluded, which is illustrated below. Firstly,



Co(II) was reduced to Co(I) complex, which then underwent transmetalation with phenyl boronic acid to yield Co(I) complex **A**. Next, the coordination and regioselective insertion of bisallene **1a** into aryl cobalt complex **A** led to allylic cobalt complex **B** or **B'**. Complex **B** proceeded intramolecular *cis*-cyclization to afford the *cis*-cyclic alkenyl cobalt complex **C**, which underwent protonation to form the *cis*-product **3aa** and regenerate the Co(I) complex. In contrast, the *trans*-cyclization product through allylic cobalt complex **B'** was not detected.

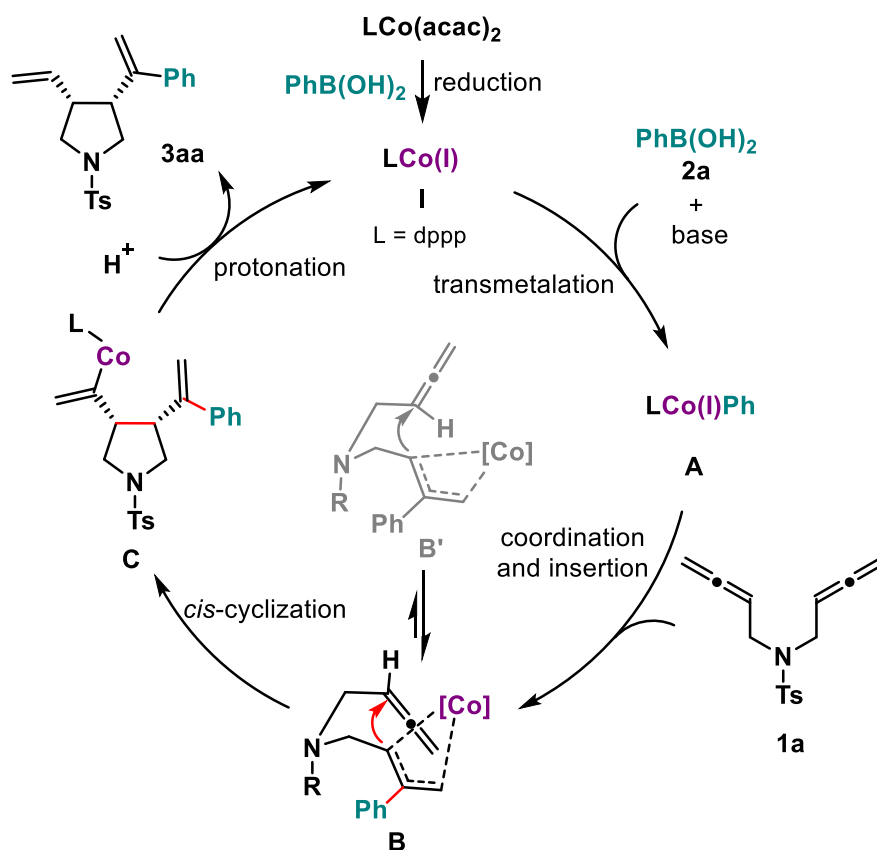

## 7. References

- [1] A. Artigas, C. Castanyer, N. Roig, A. Lledó, M. Solà, A. Pla-Quintana and A. Roglans, *Adv. Synth. Catal.*, 2021, **363**, 3835–3844.
- [2] M. T. Quirós, C. Hurtado-Rodrigo and M. P. Muñoz, *Org. Biomol. Chem.*, 2017, **15**, 6731–6737.
- [3] A. Artigas, J. Vila, A. Lledó, M. Solà, A. Pla-Quintana and A. Roglans, *Org. Lett.*, 2019, **21**, 6608–6613.
- [4] J. H. Park, E. Kim, H.-M. Kim, S. Y. Choi and Y. K. Chung, *Chem. Commun.*, 2008, 2388–2390.
- [5] S. Arai, Y. Kawata, Y. Amako and A. Nishida, *Tetrahedron Lett.*, 2019, **60**, 151168.
- [6] J. Cheng, X. Jiang and S. Ma, *Org. Lett.*, 2011, **13**, 5200–5203.

## 8. NMR Spectra

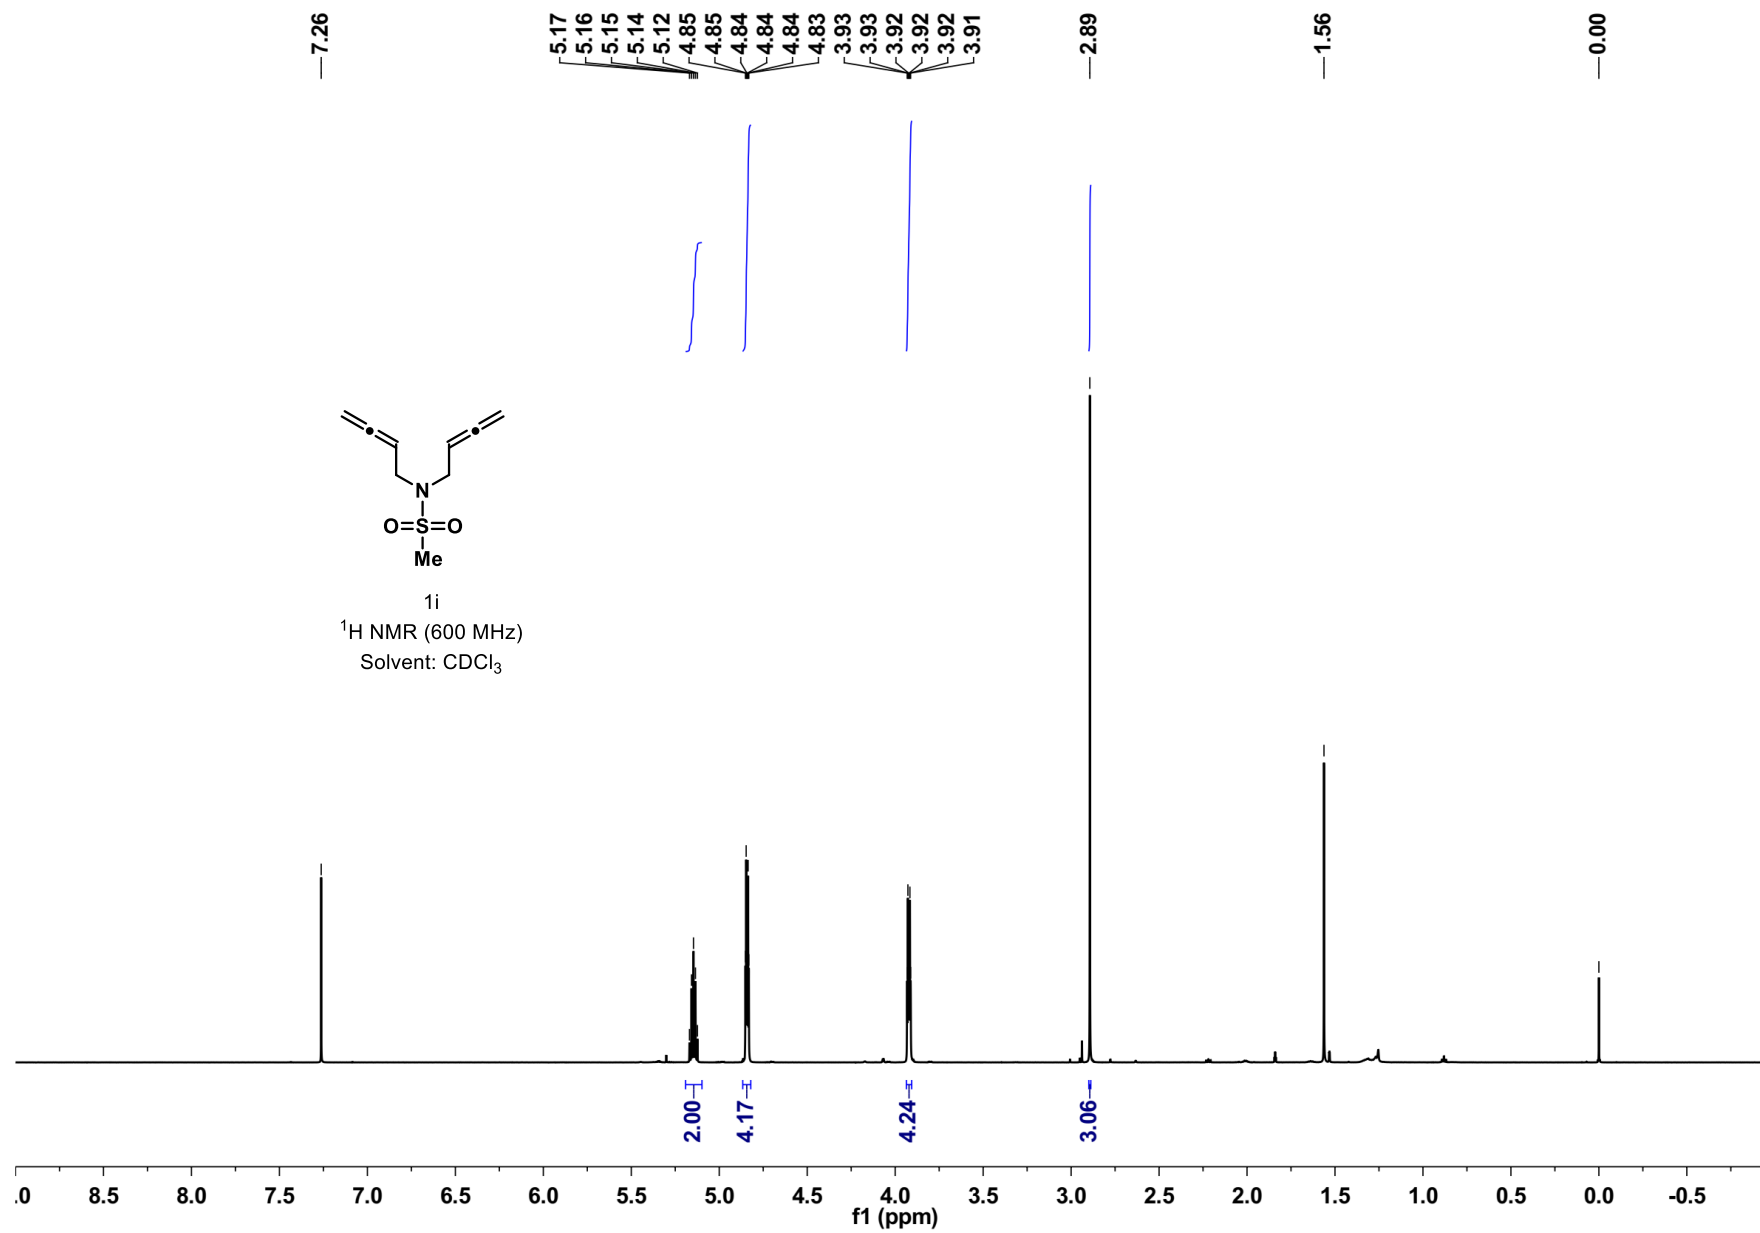

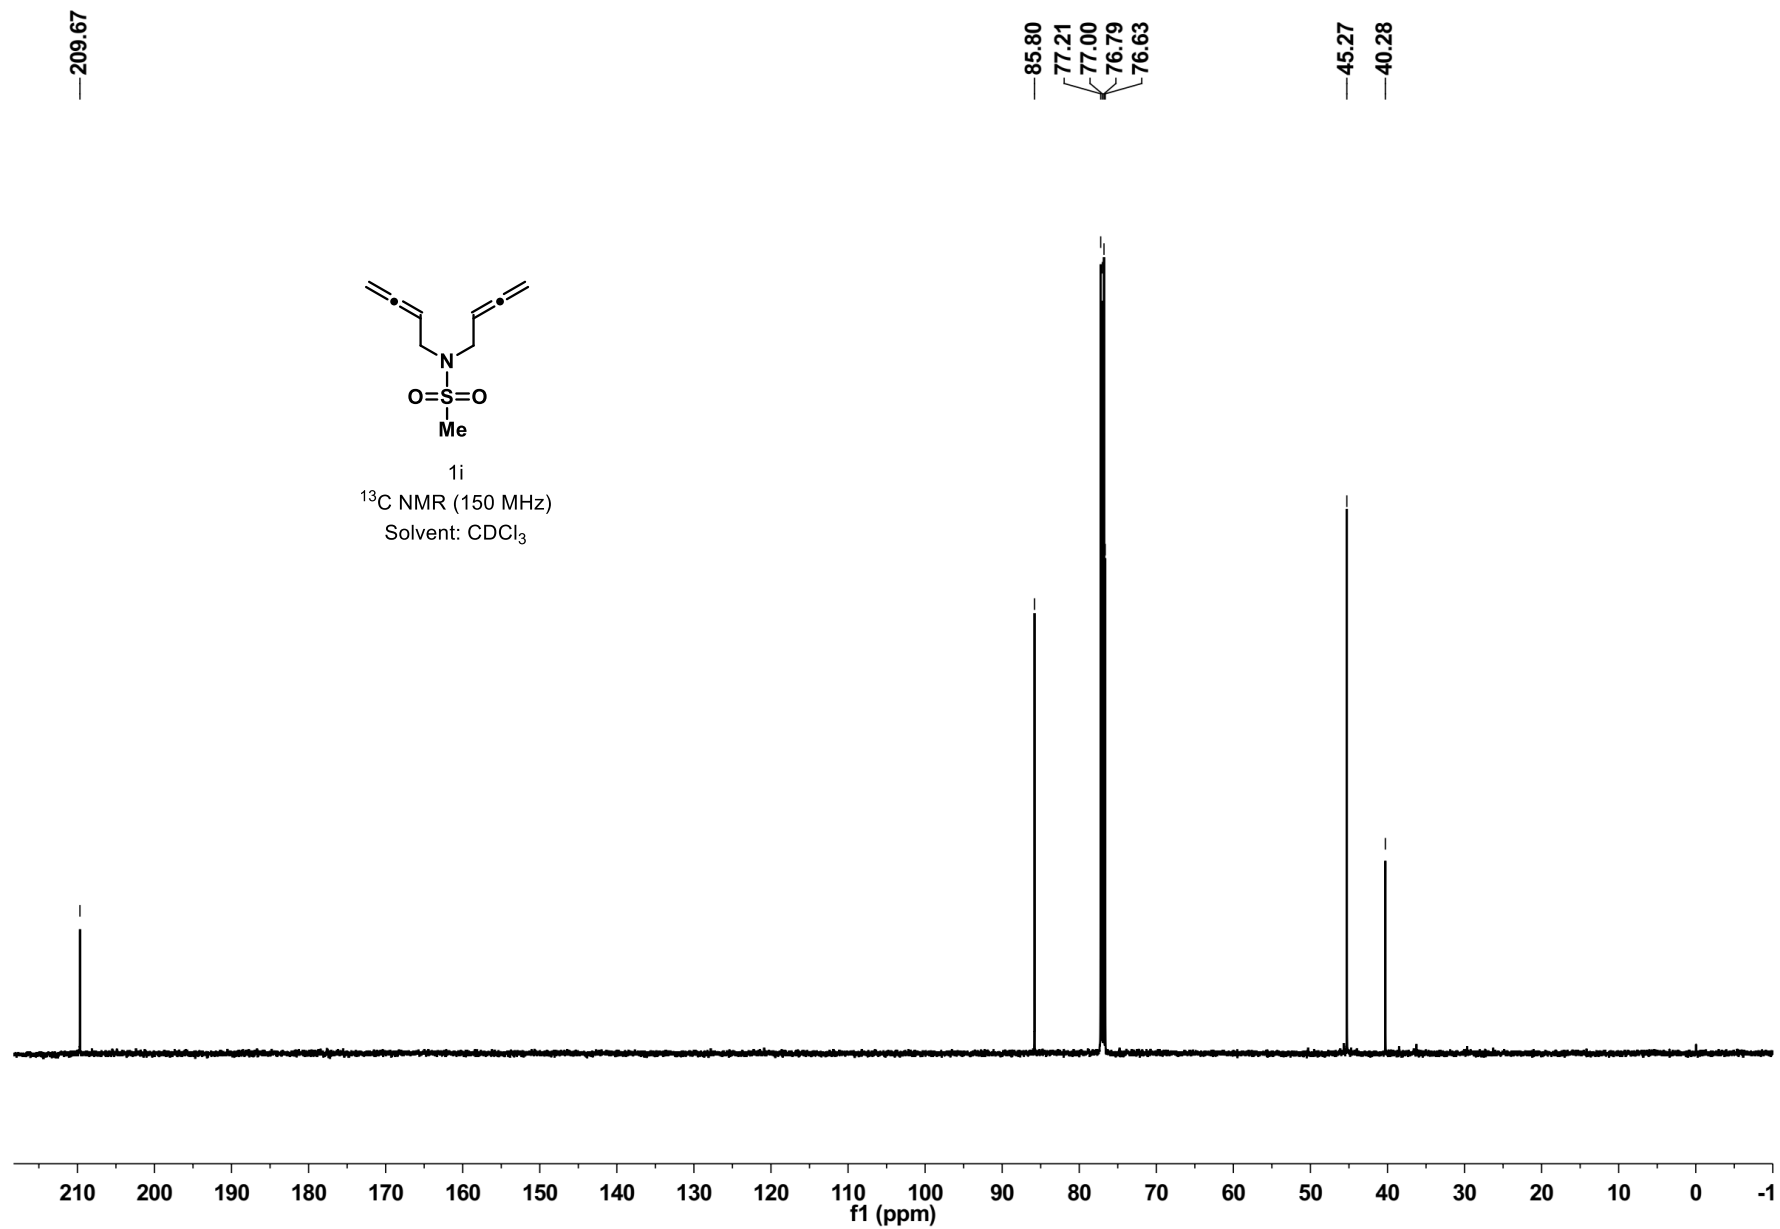

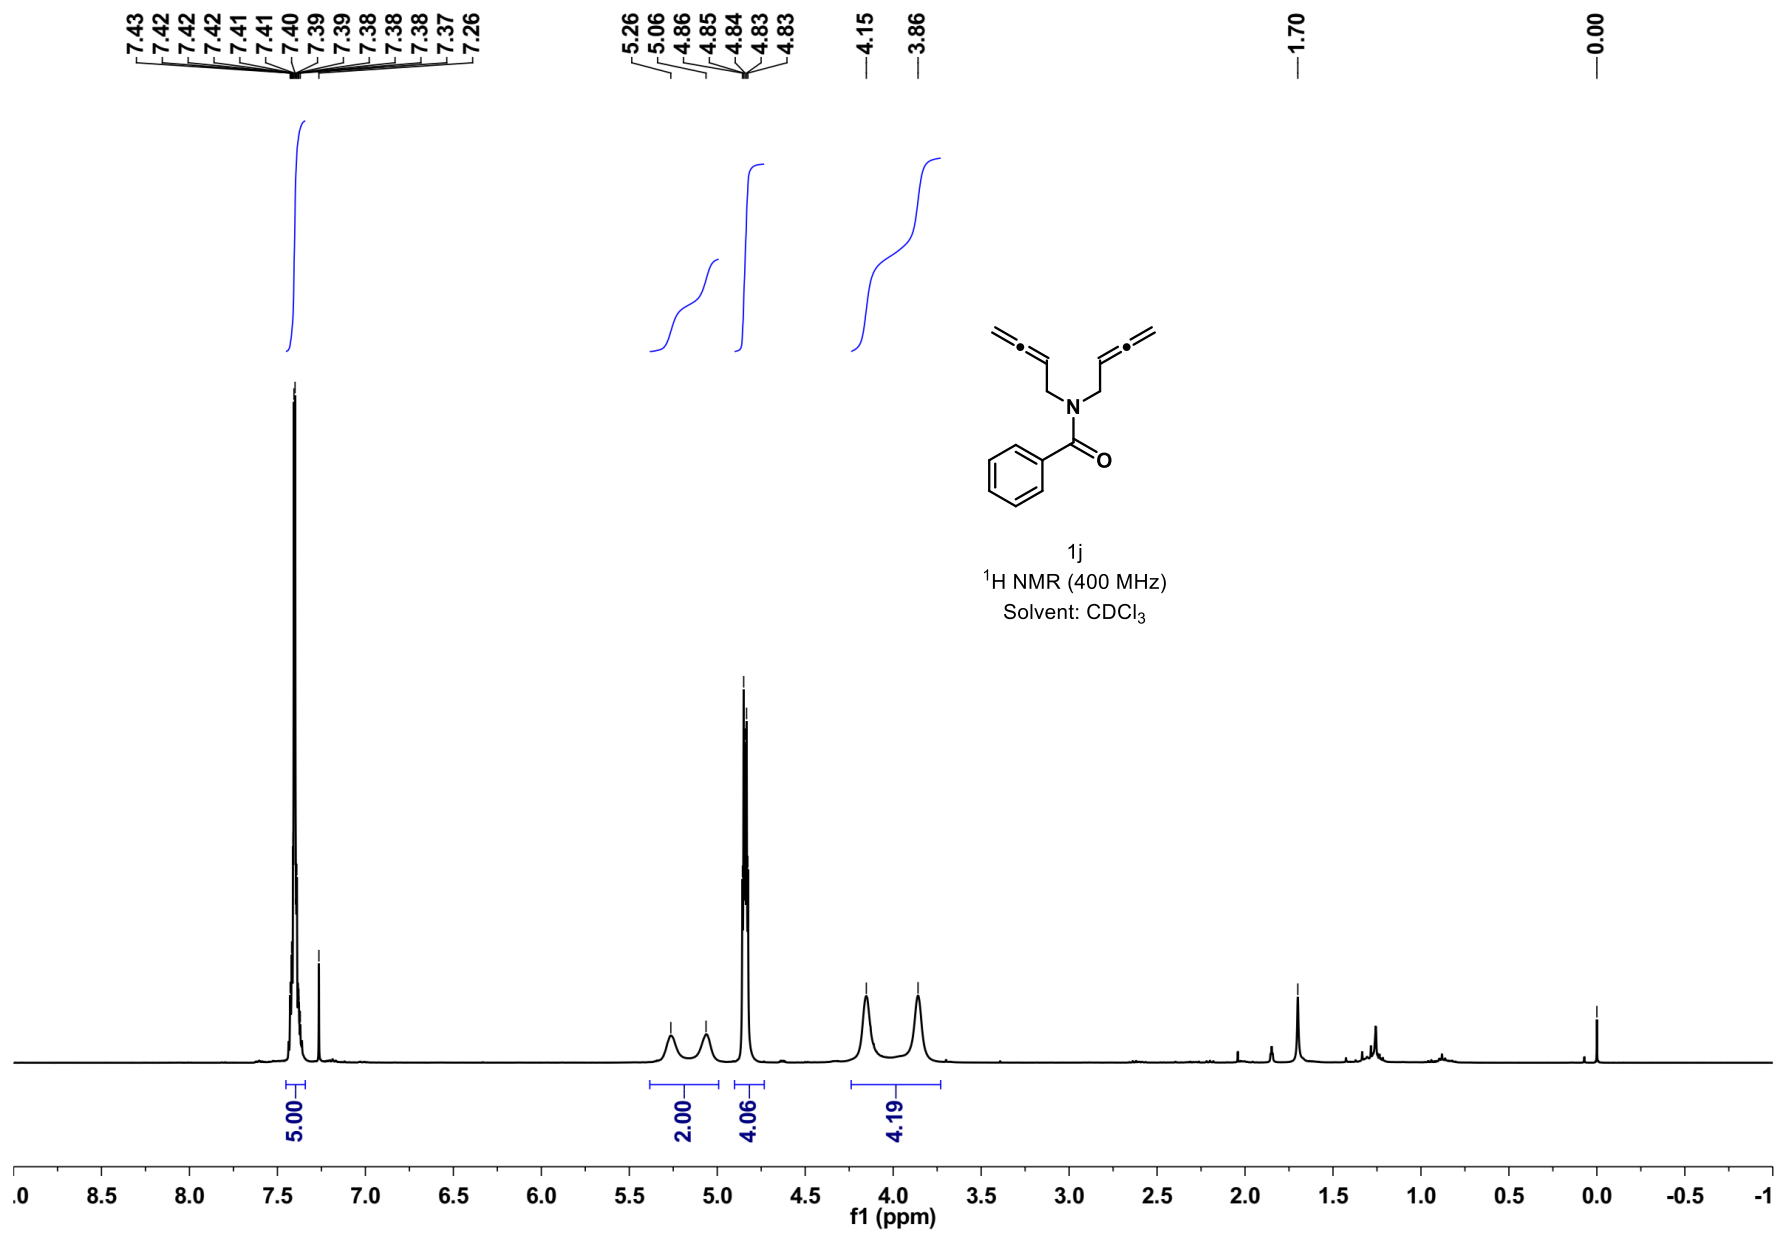

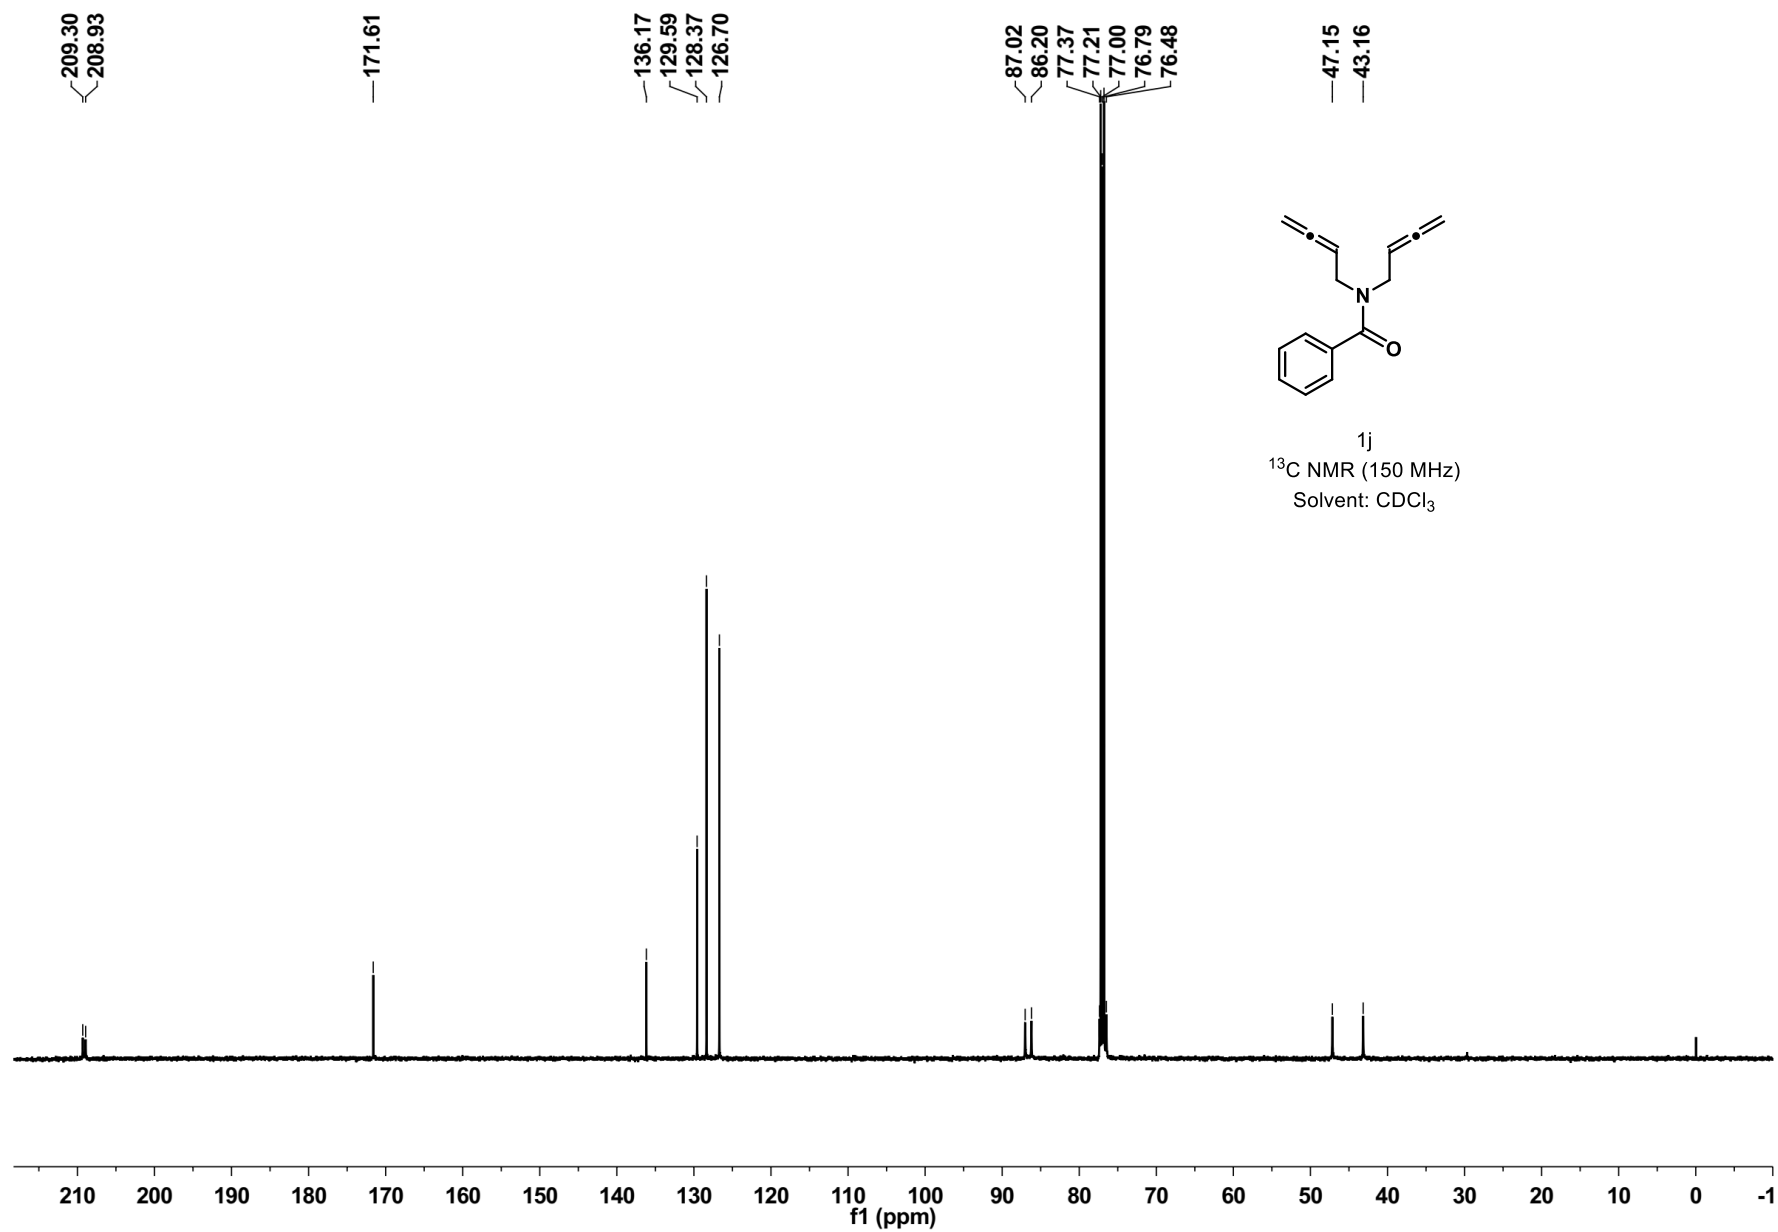

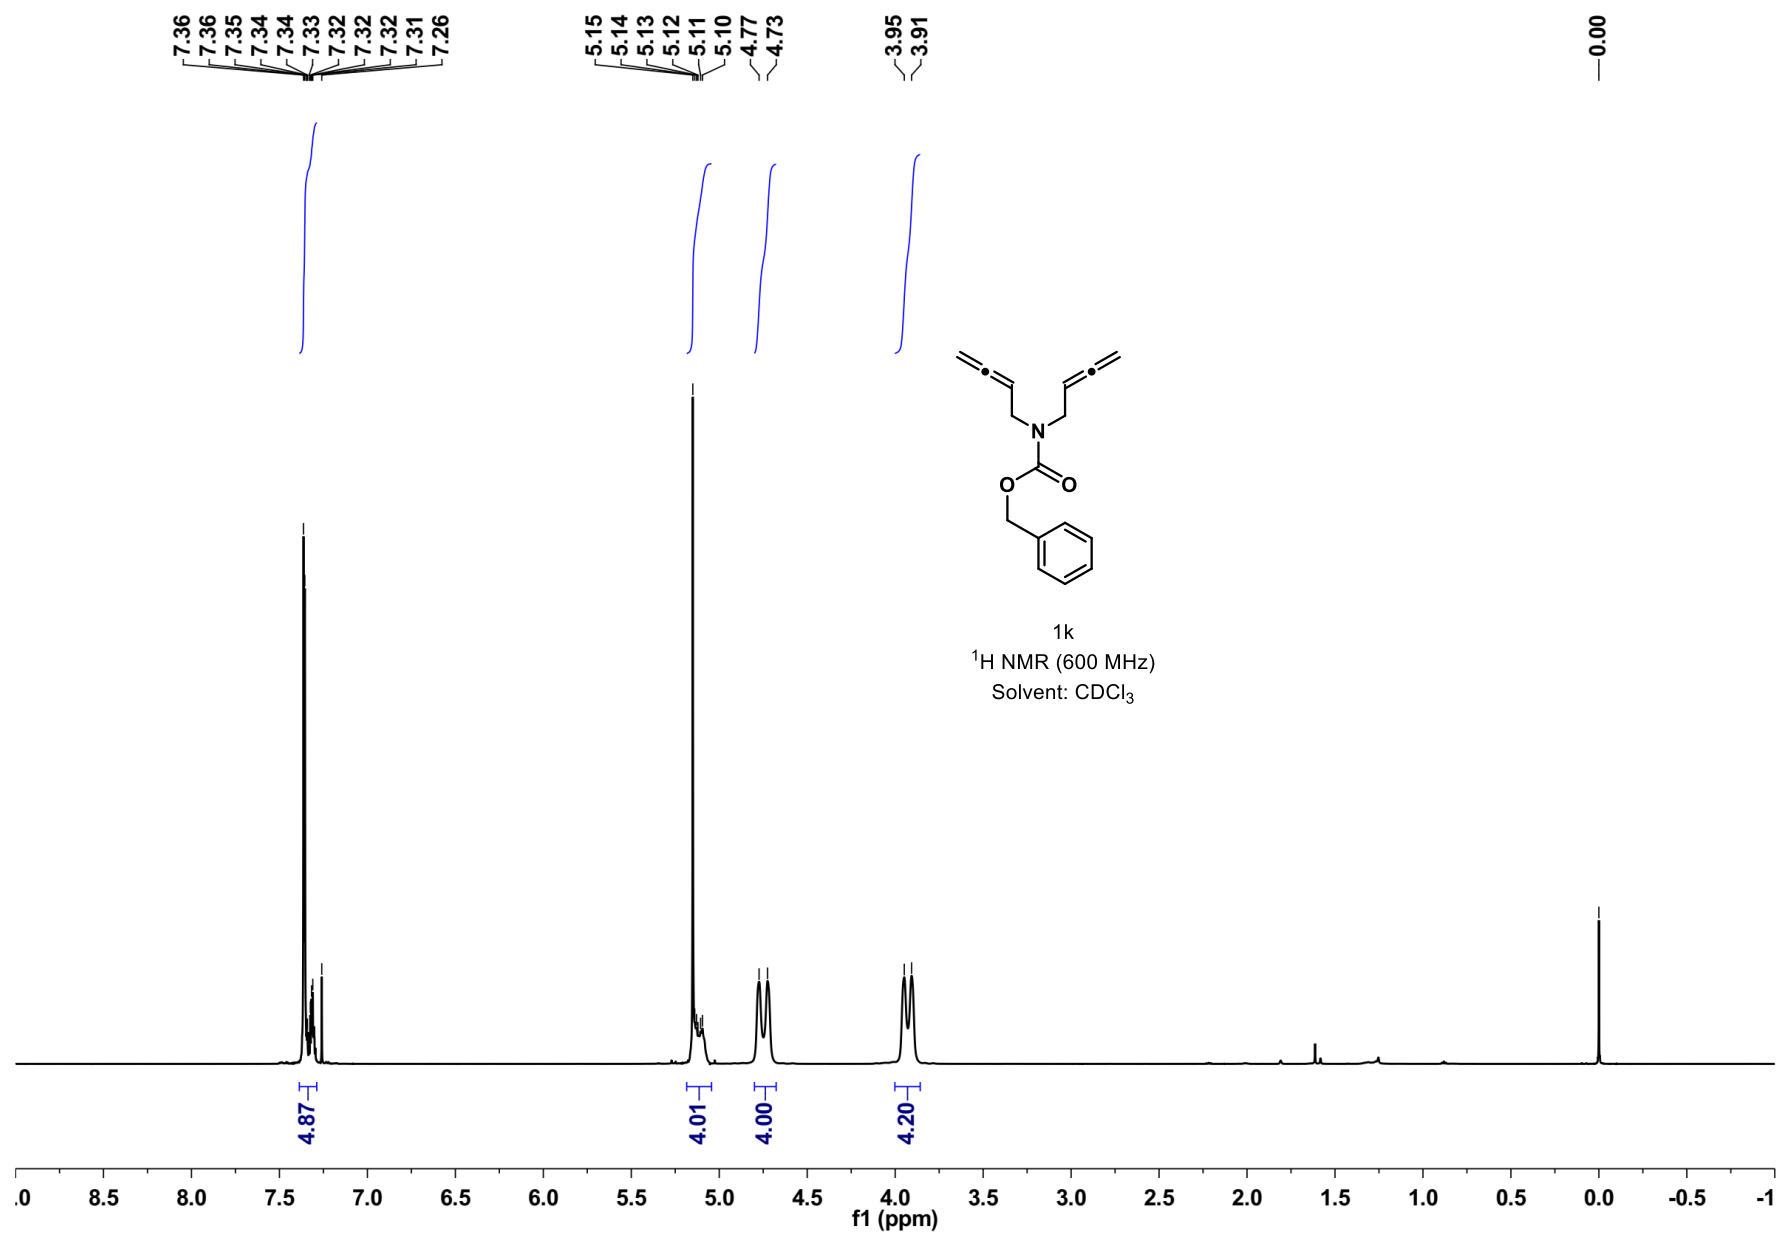



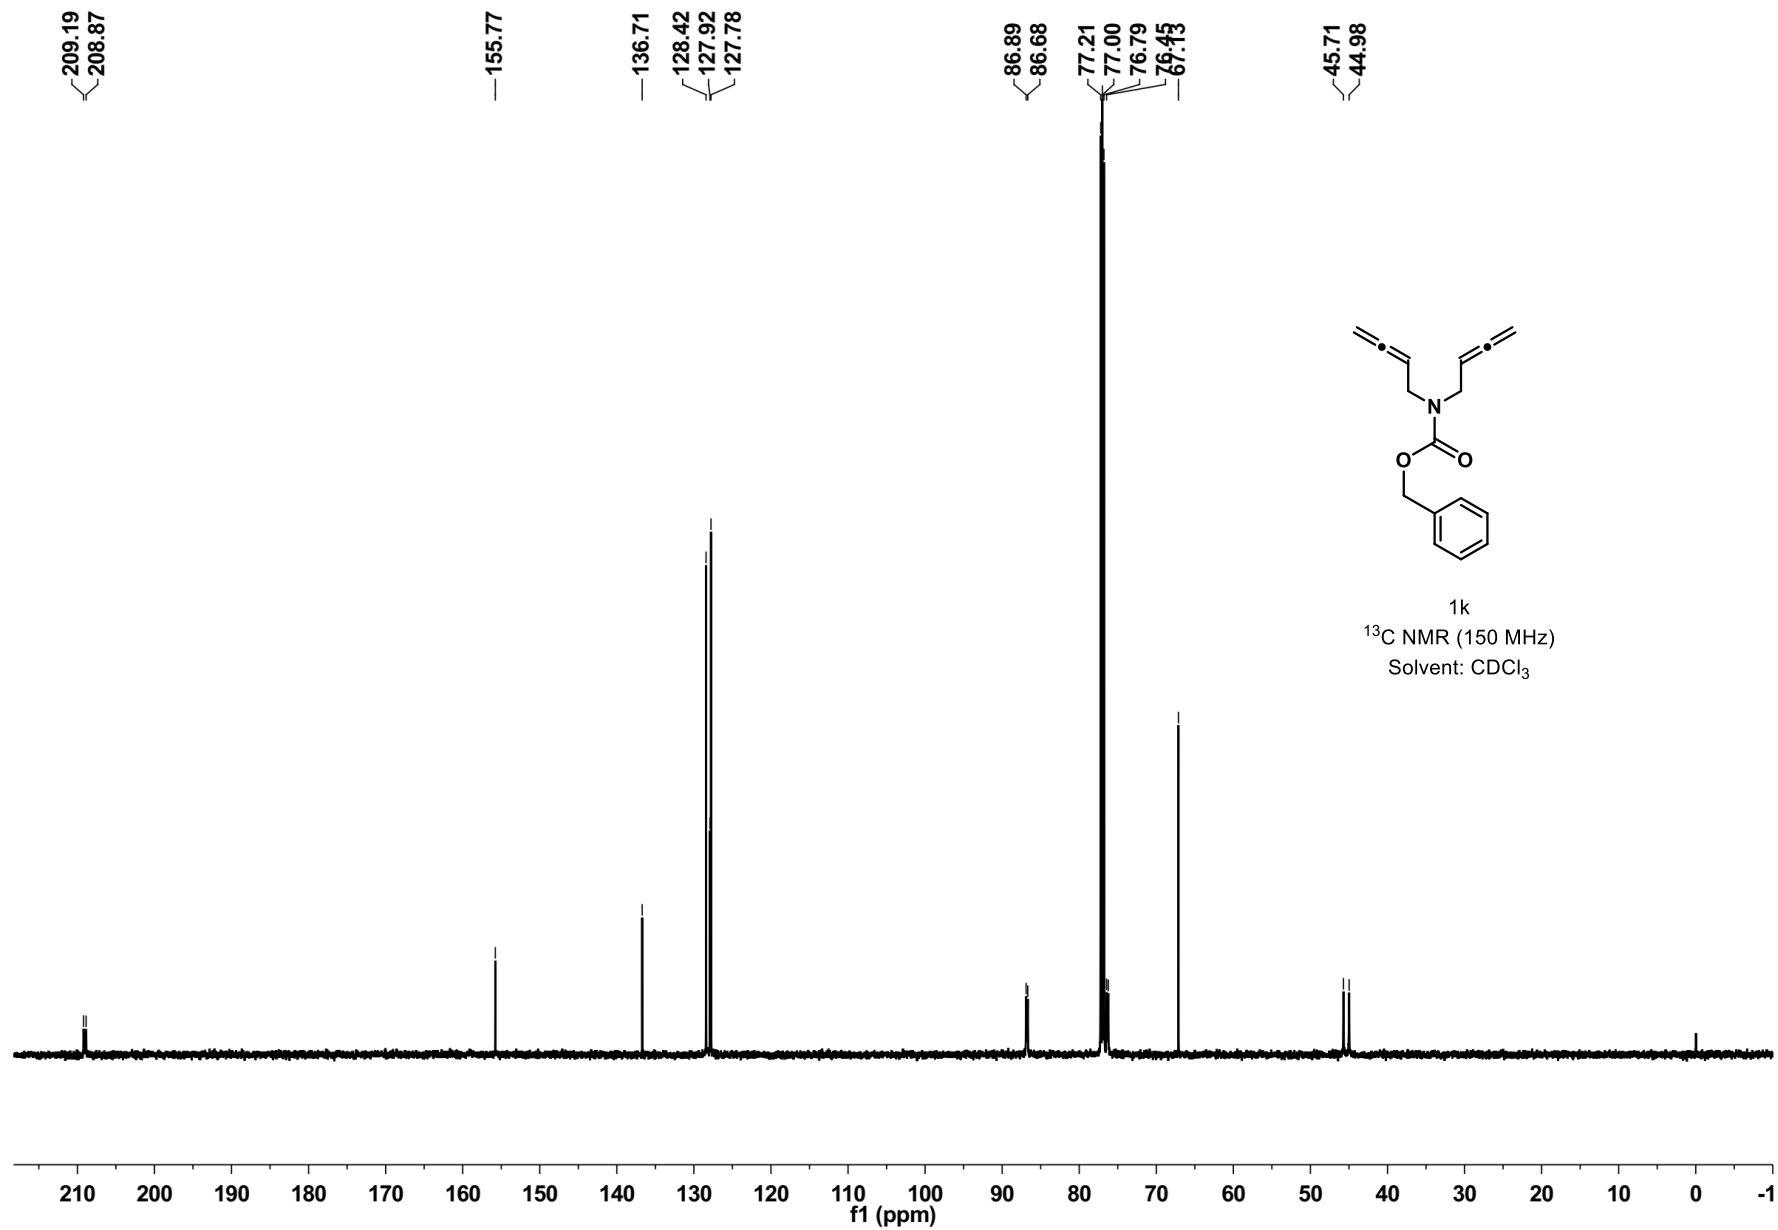

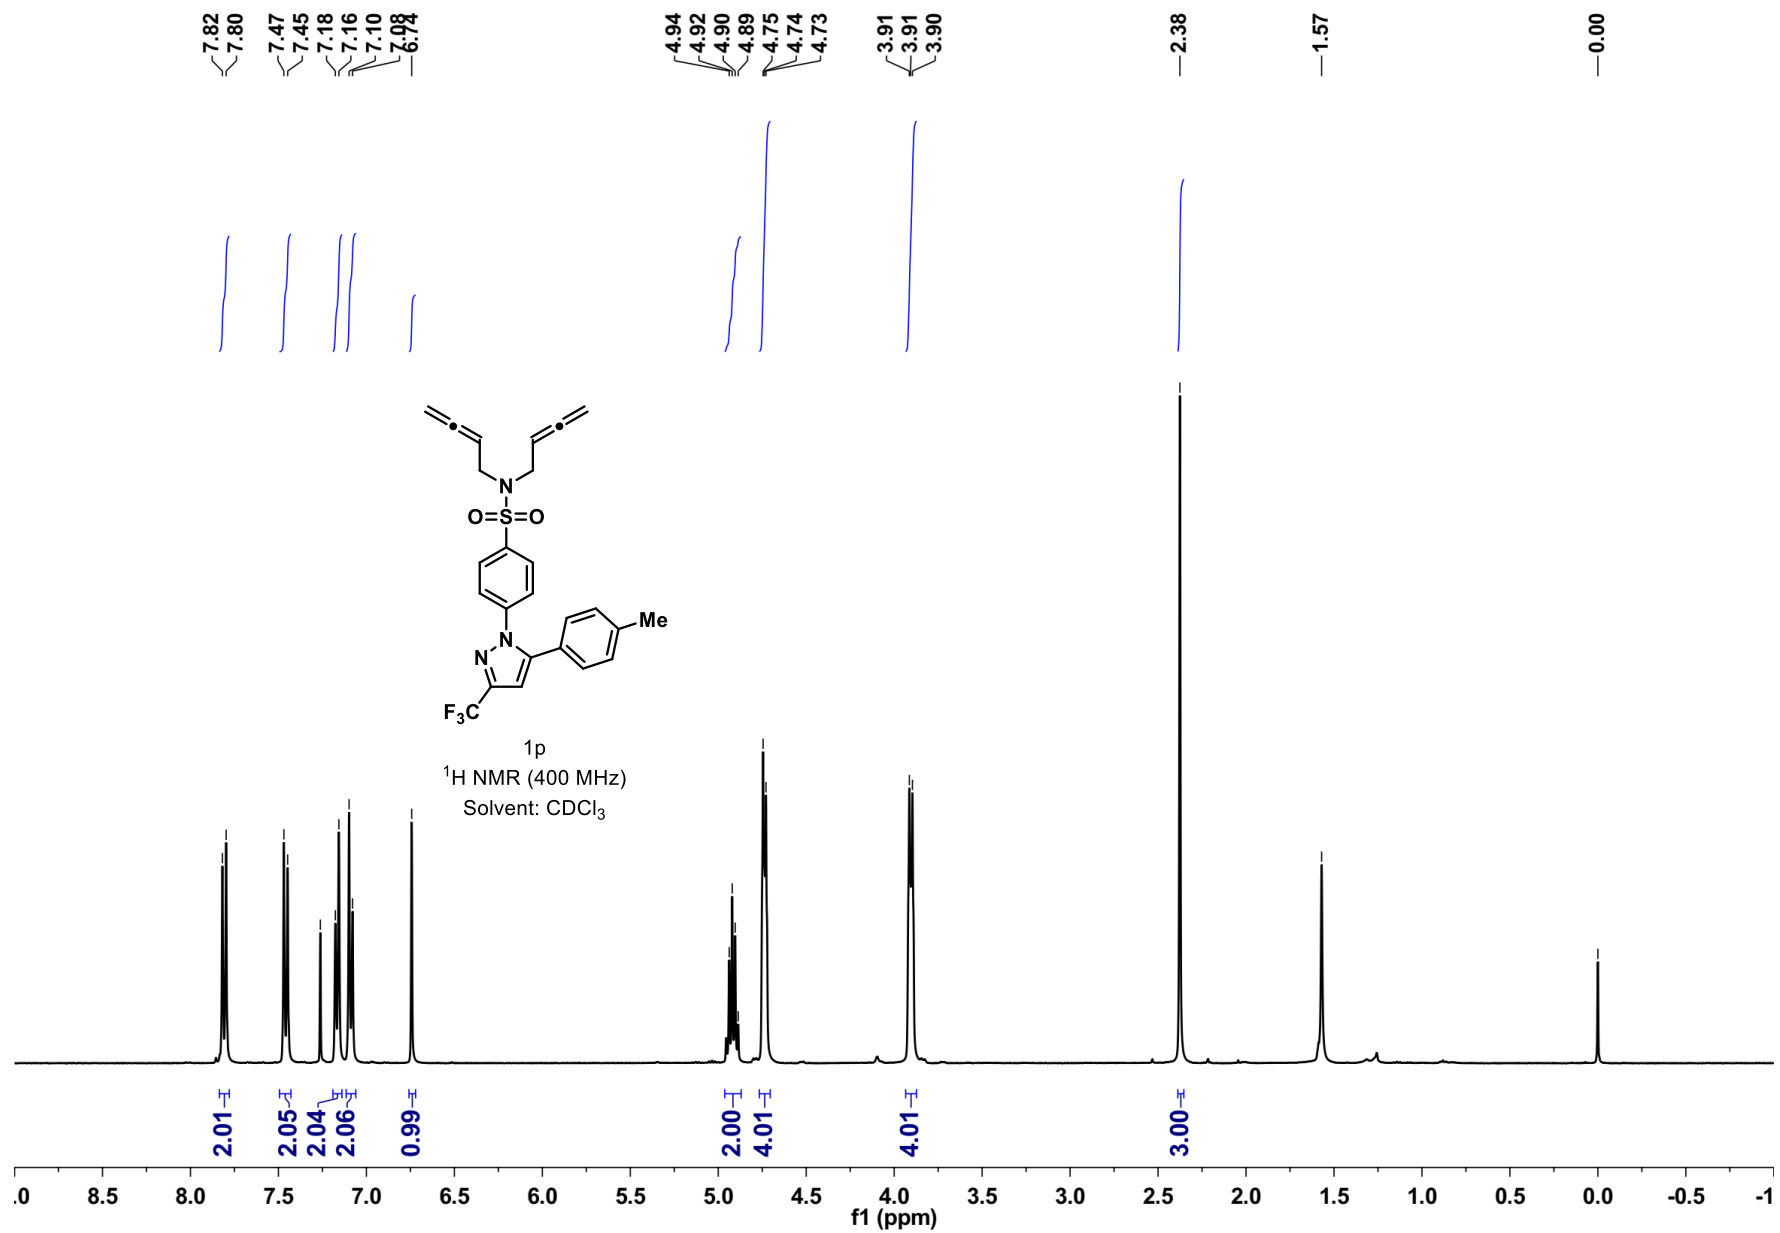

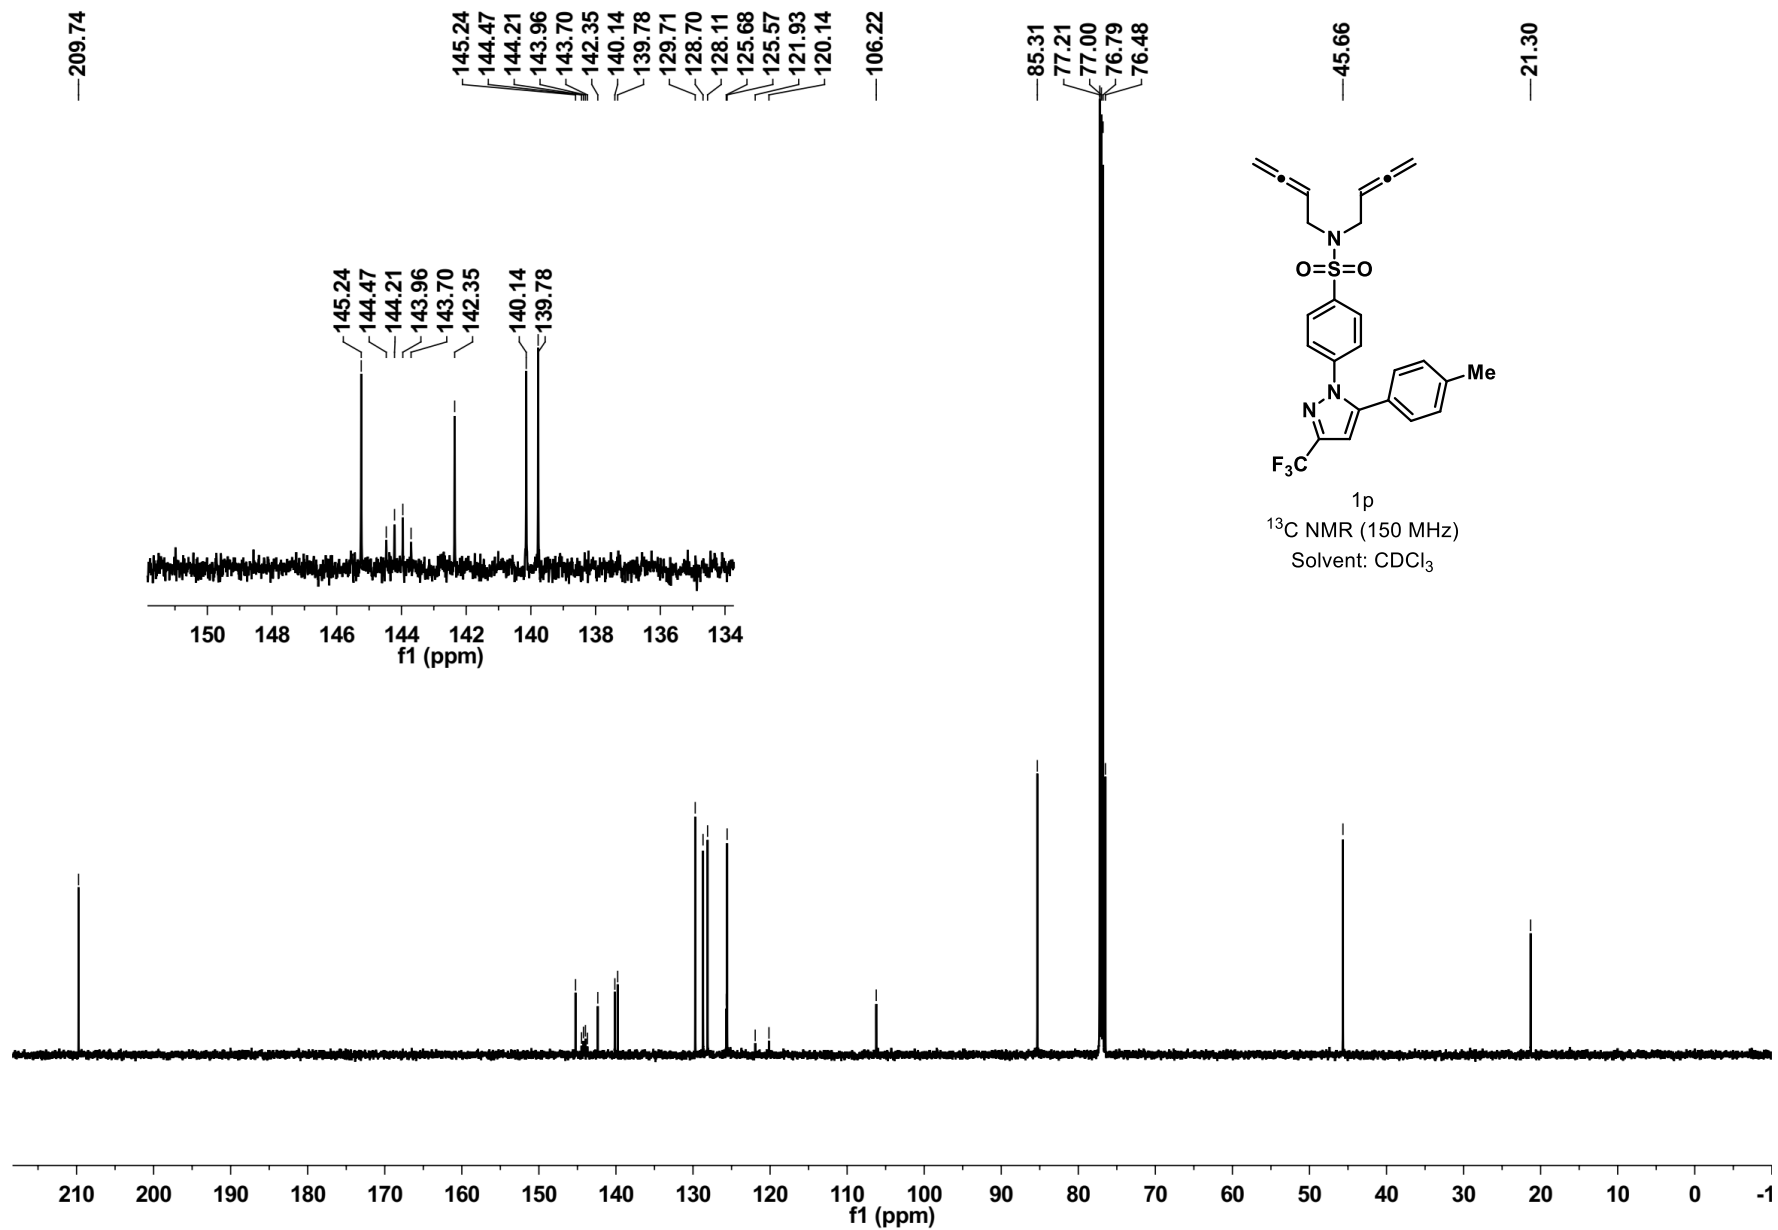

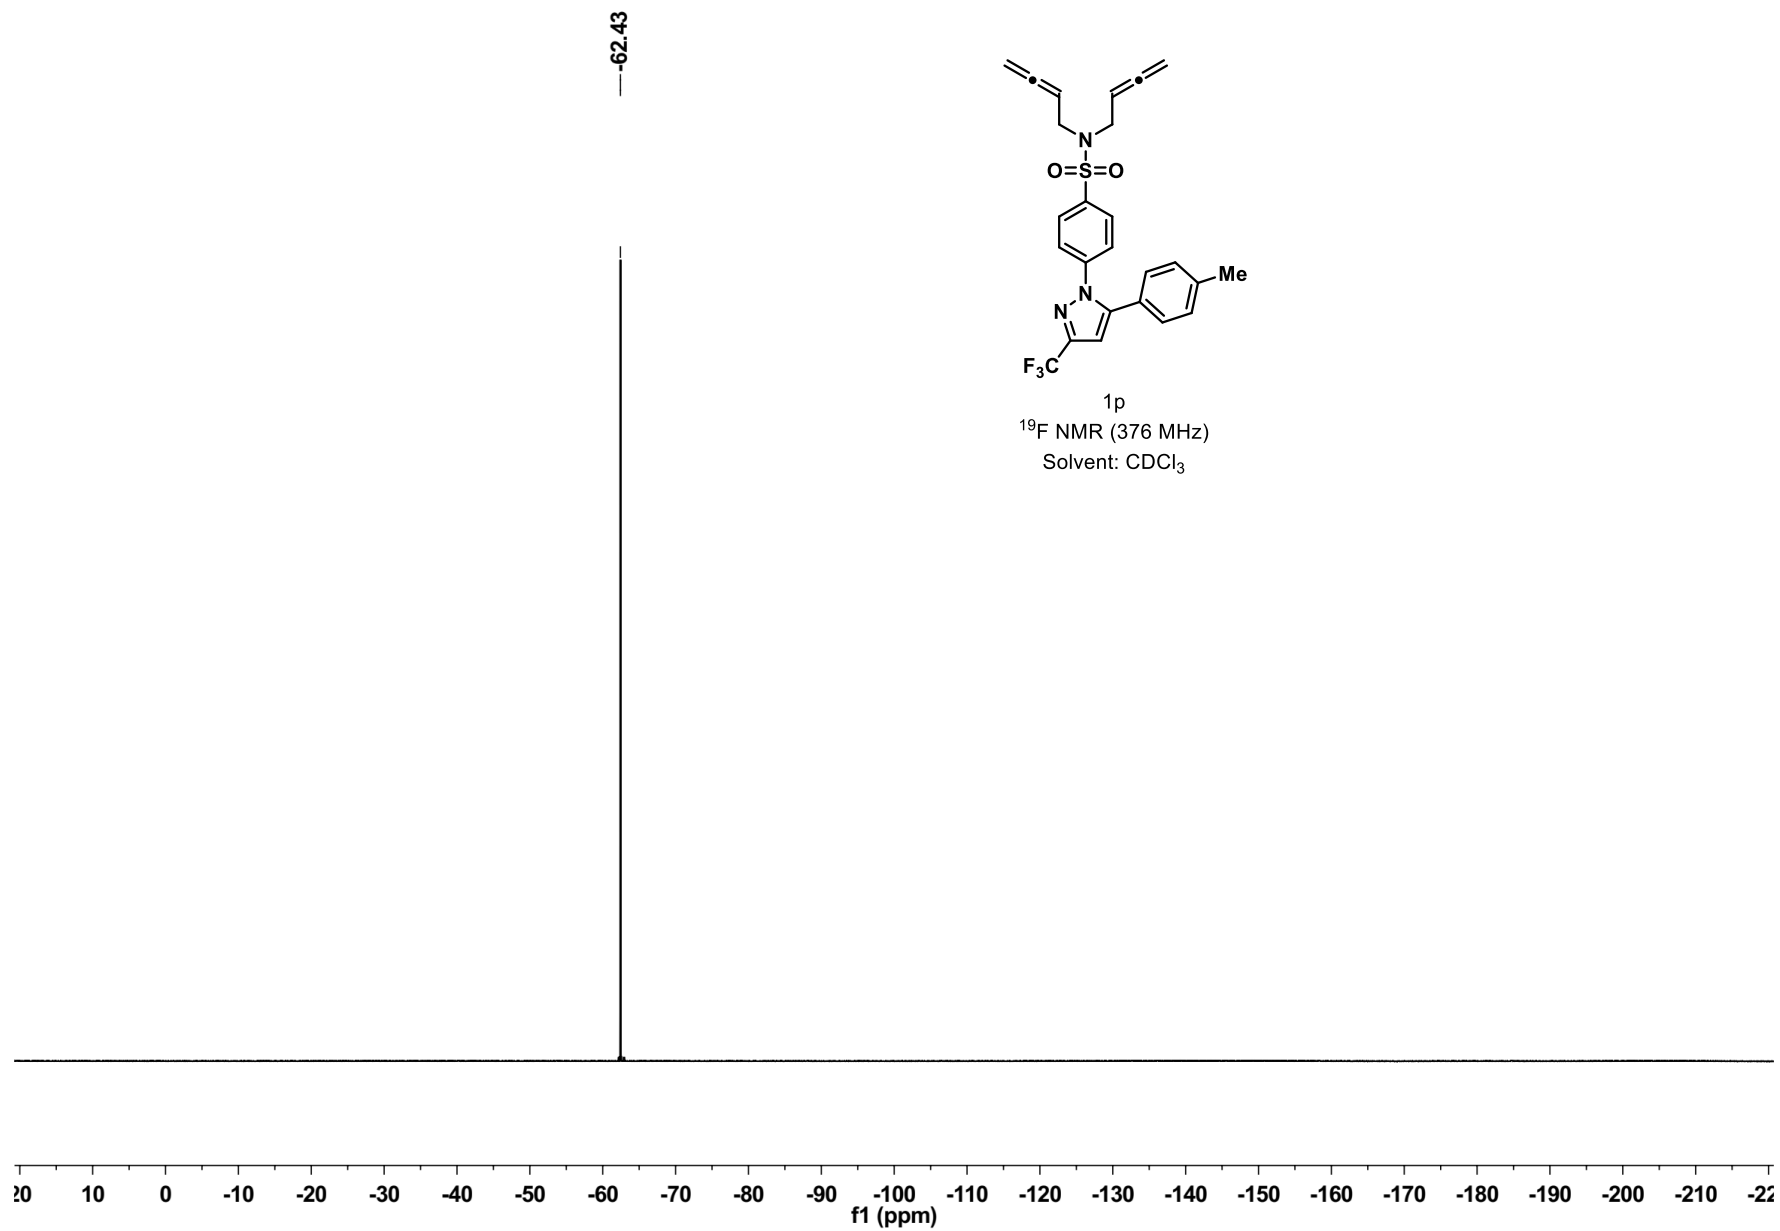

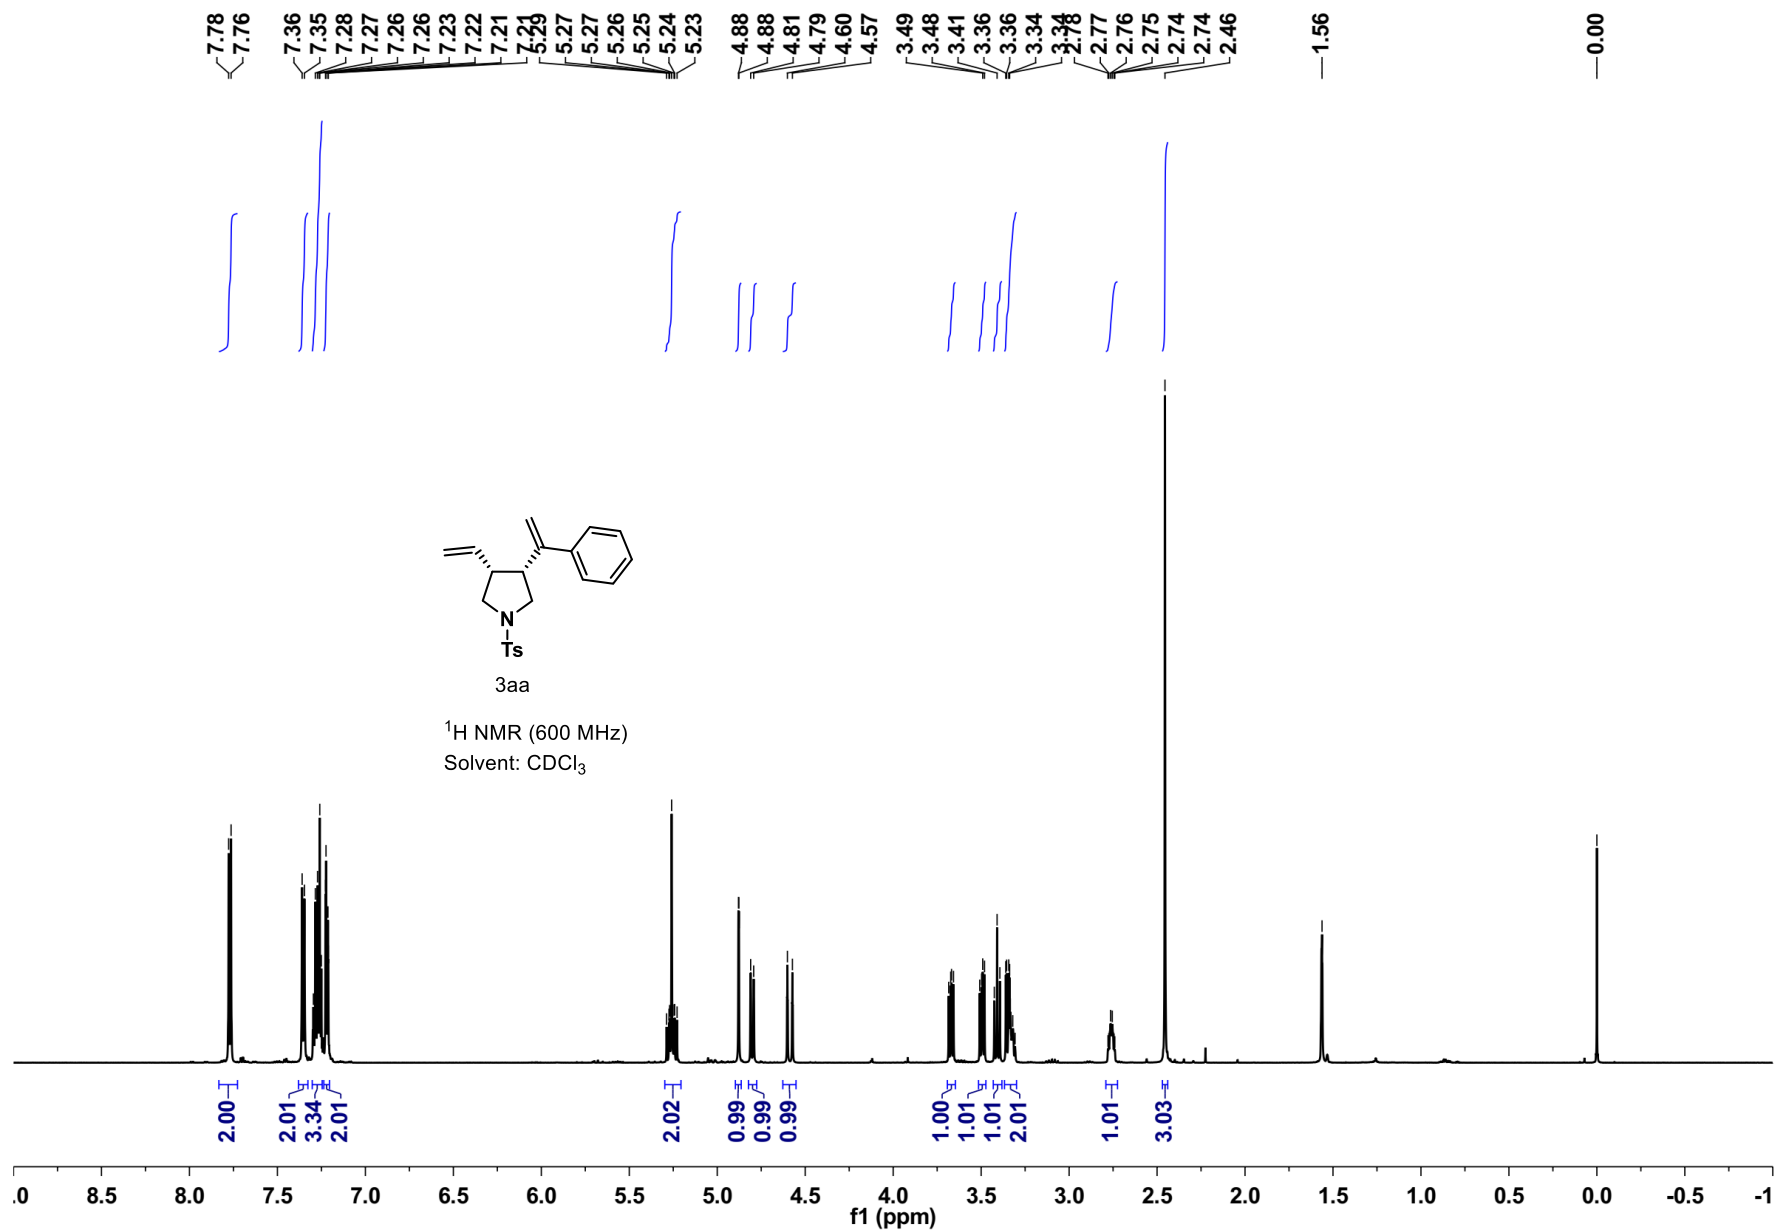

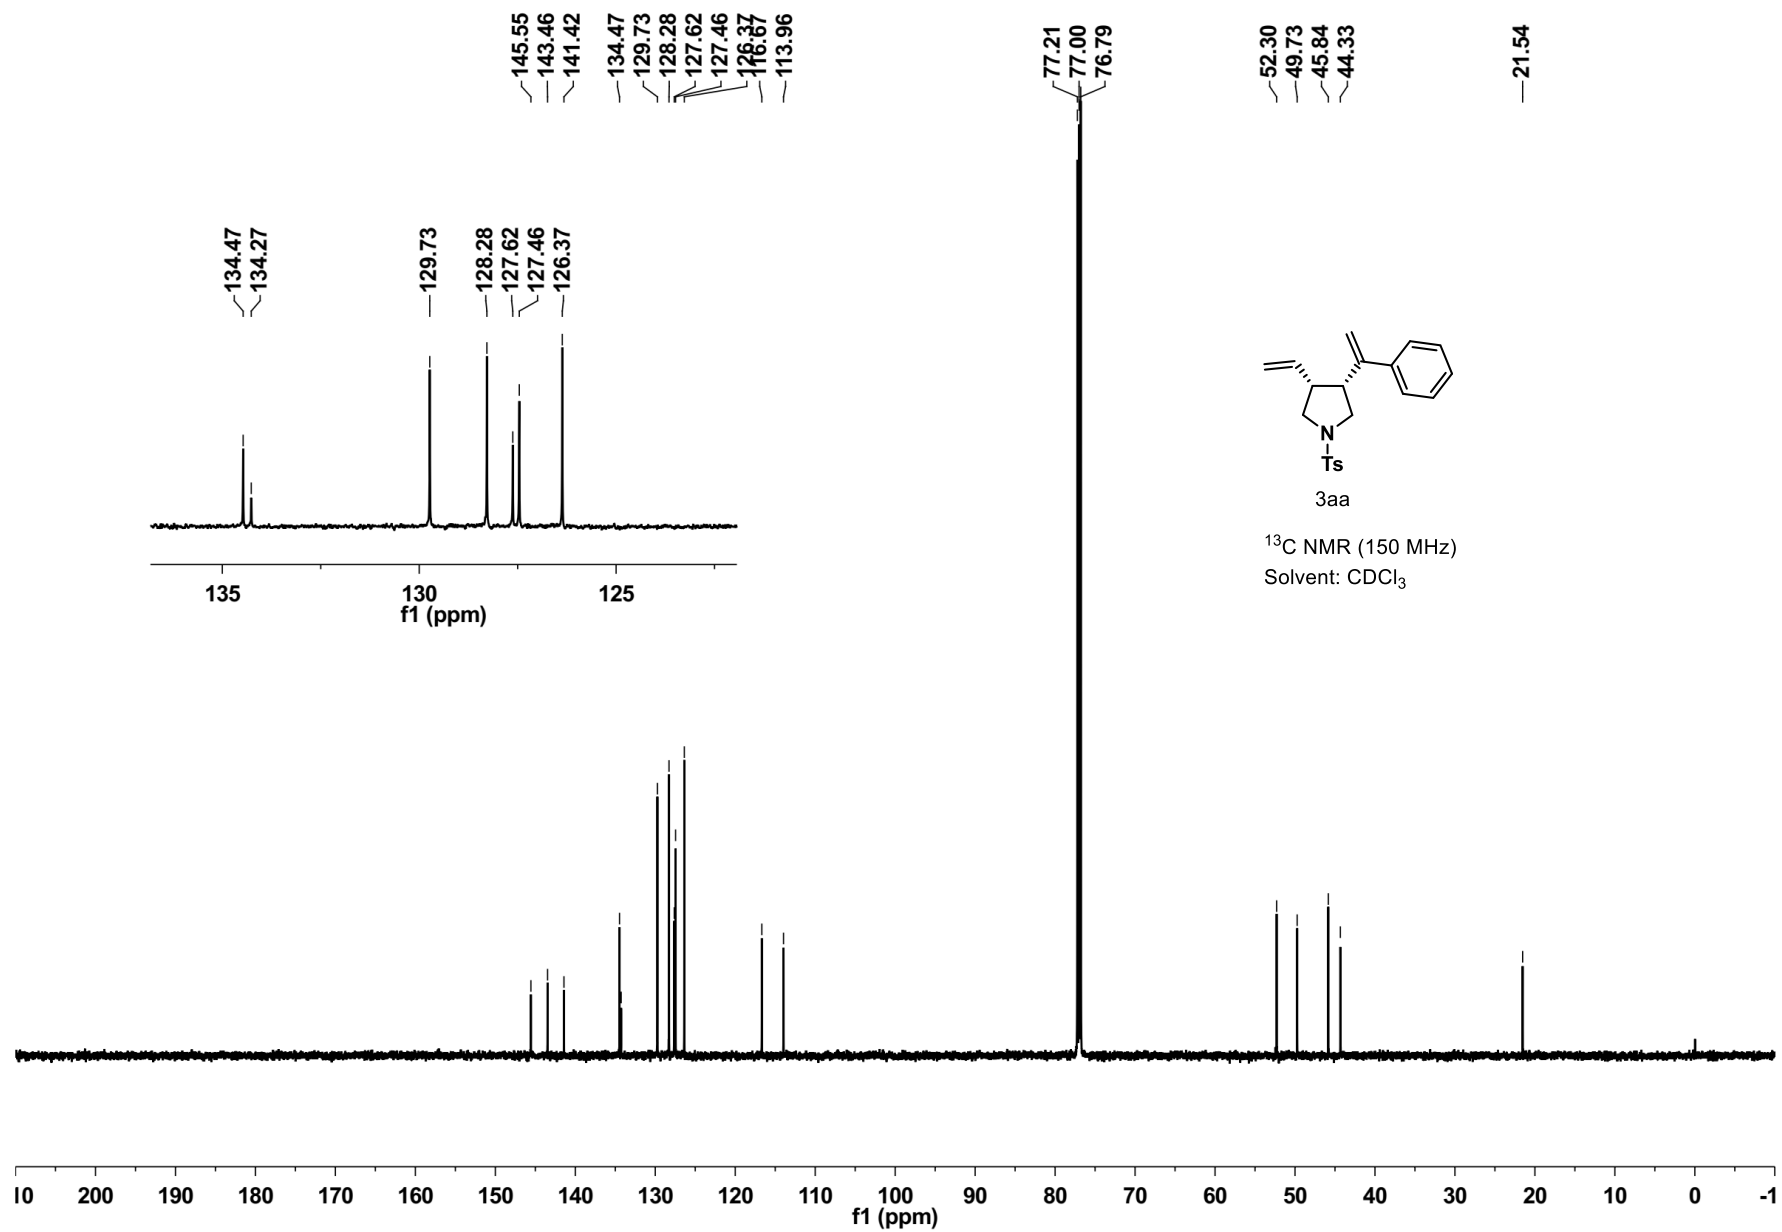

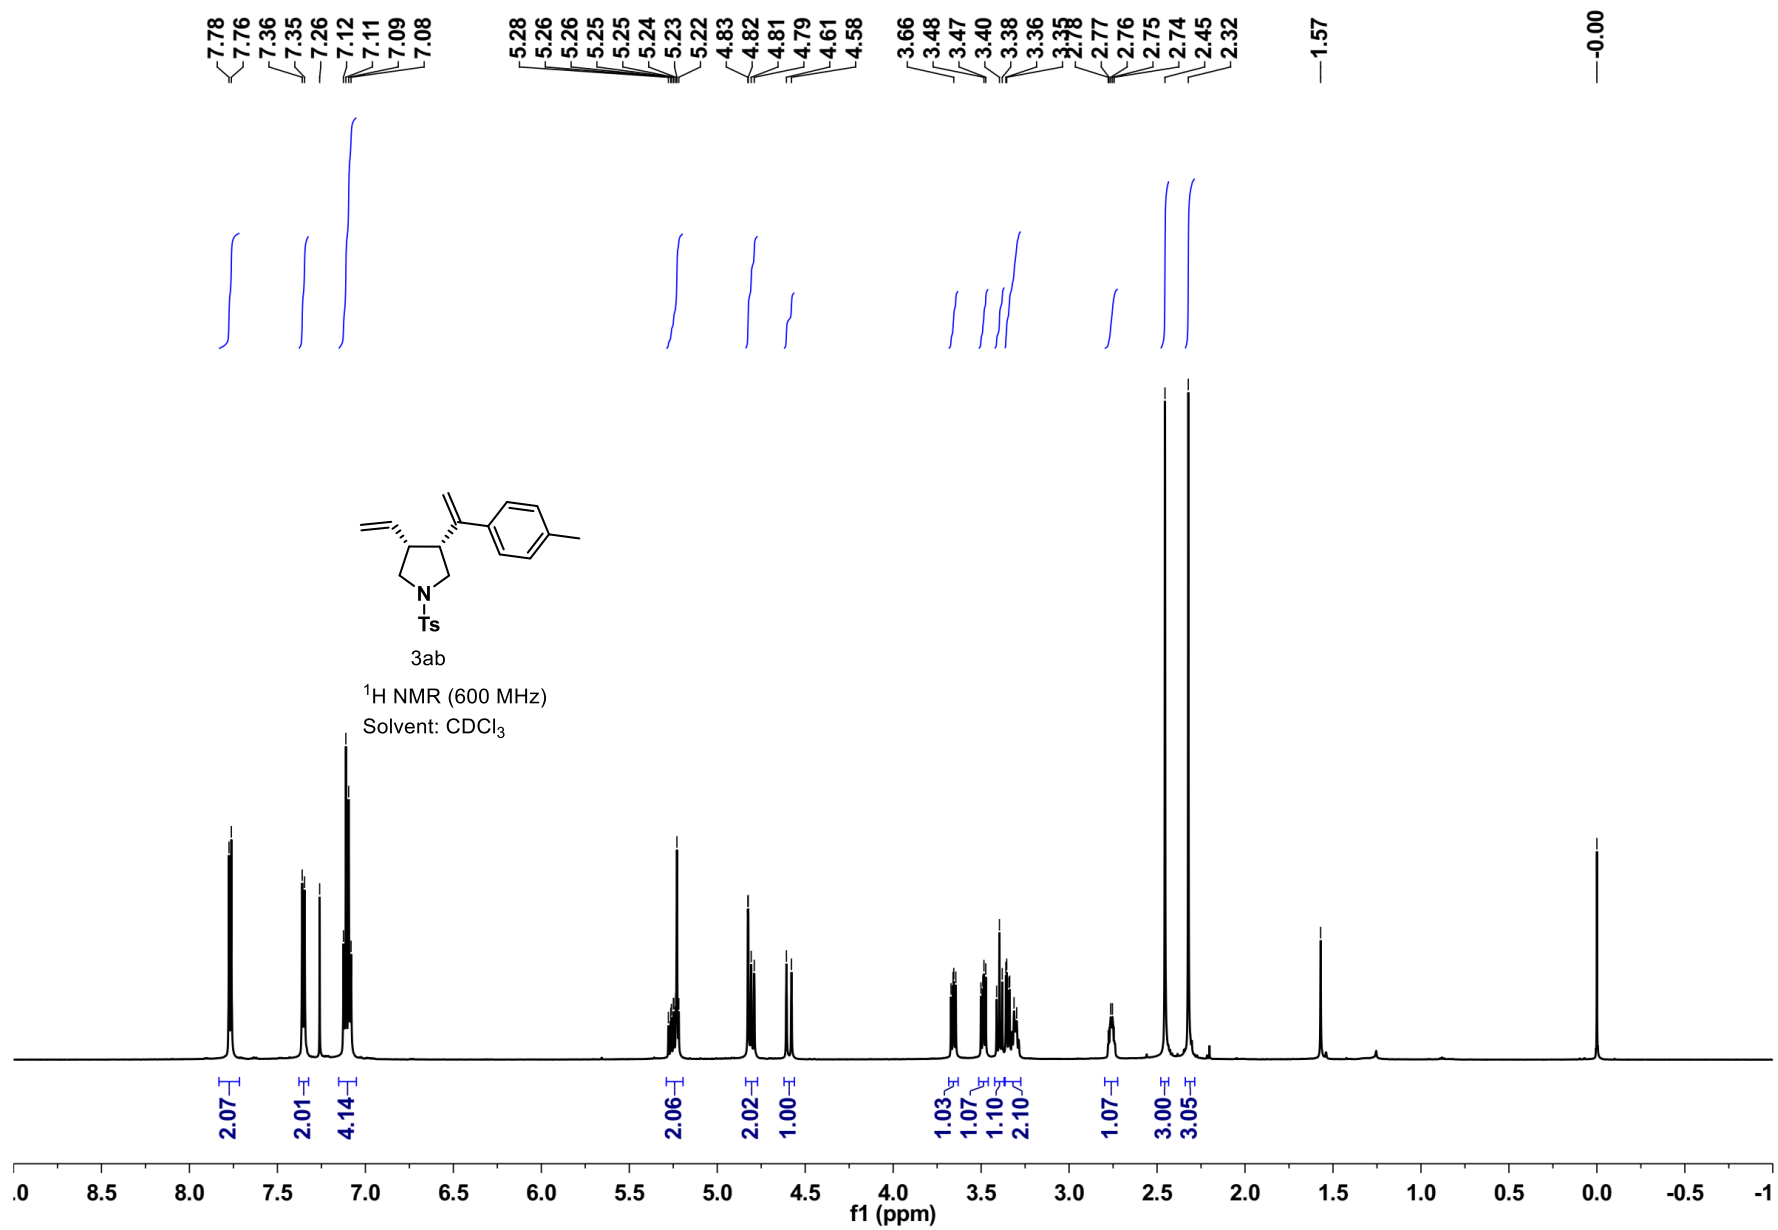

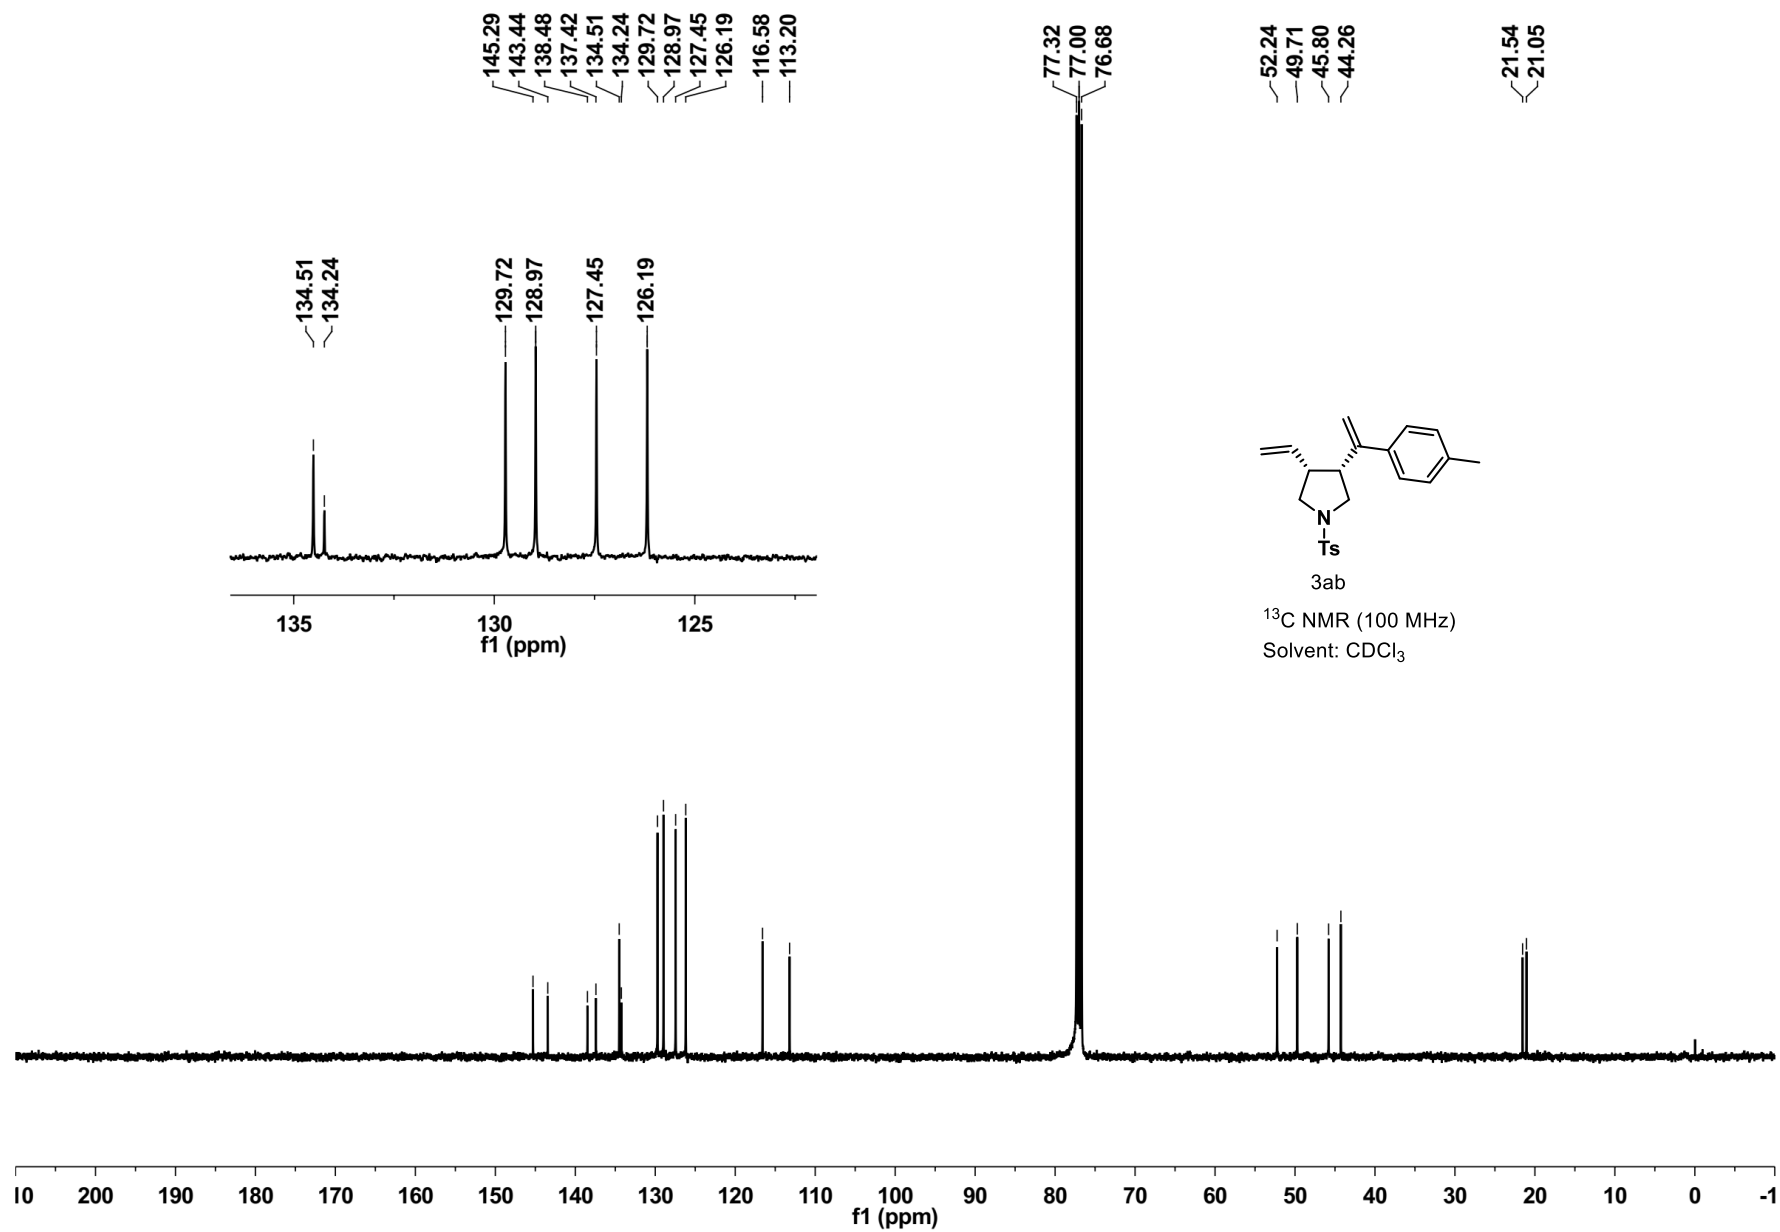



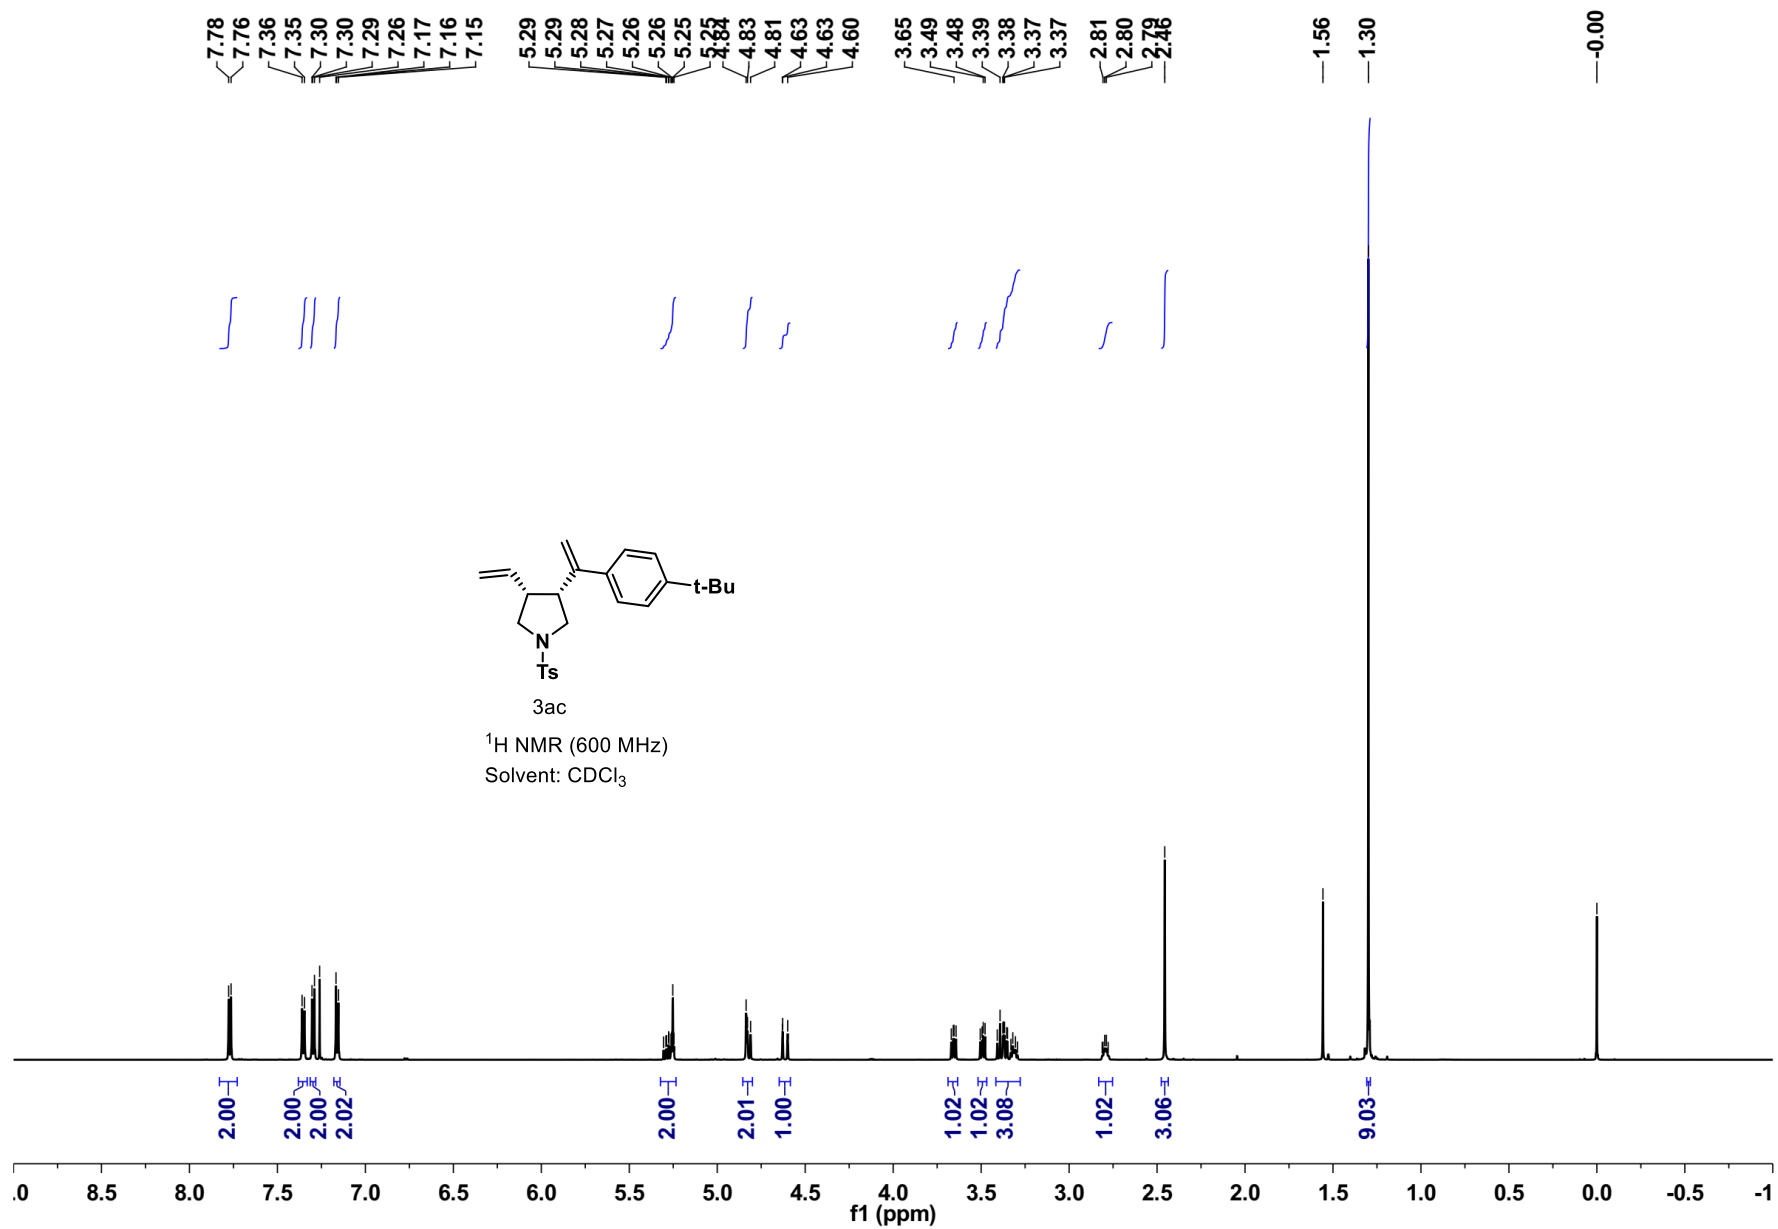

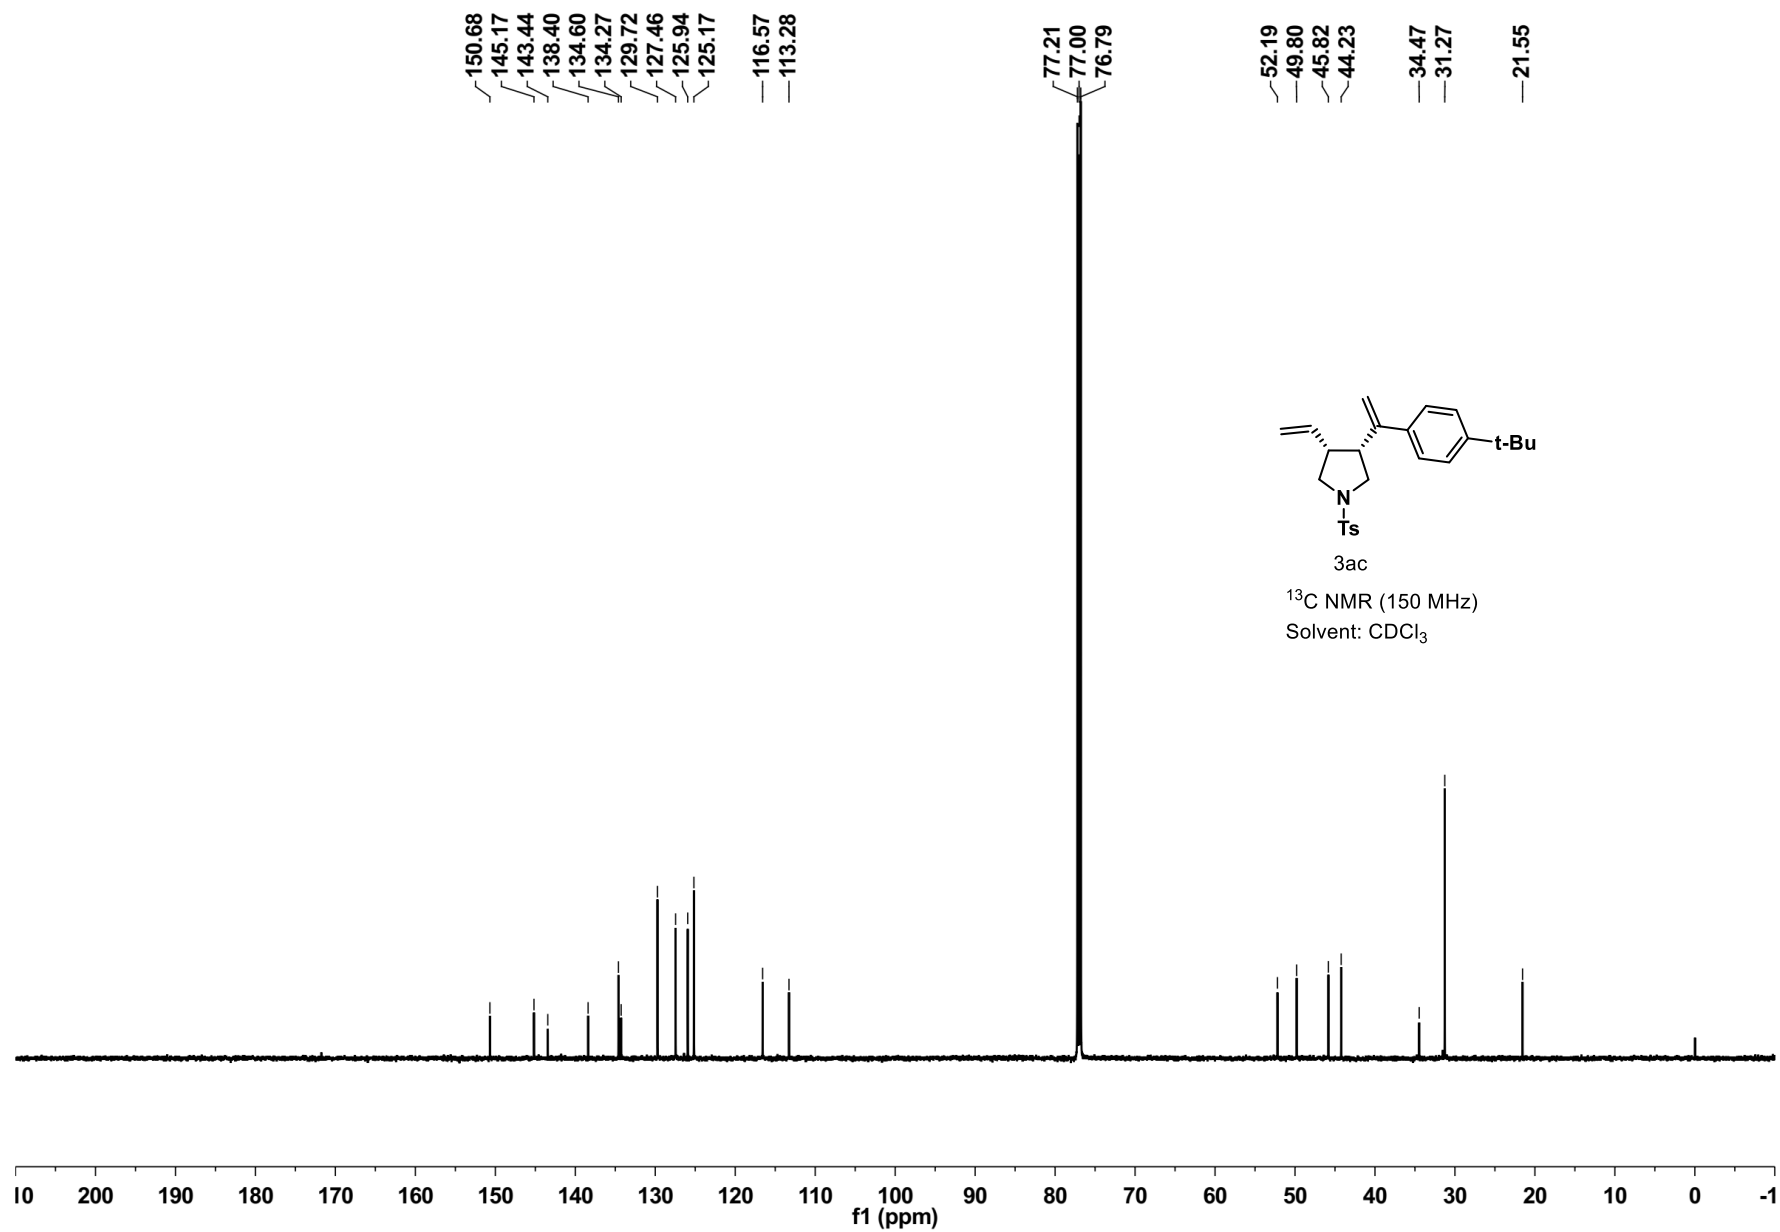

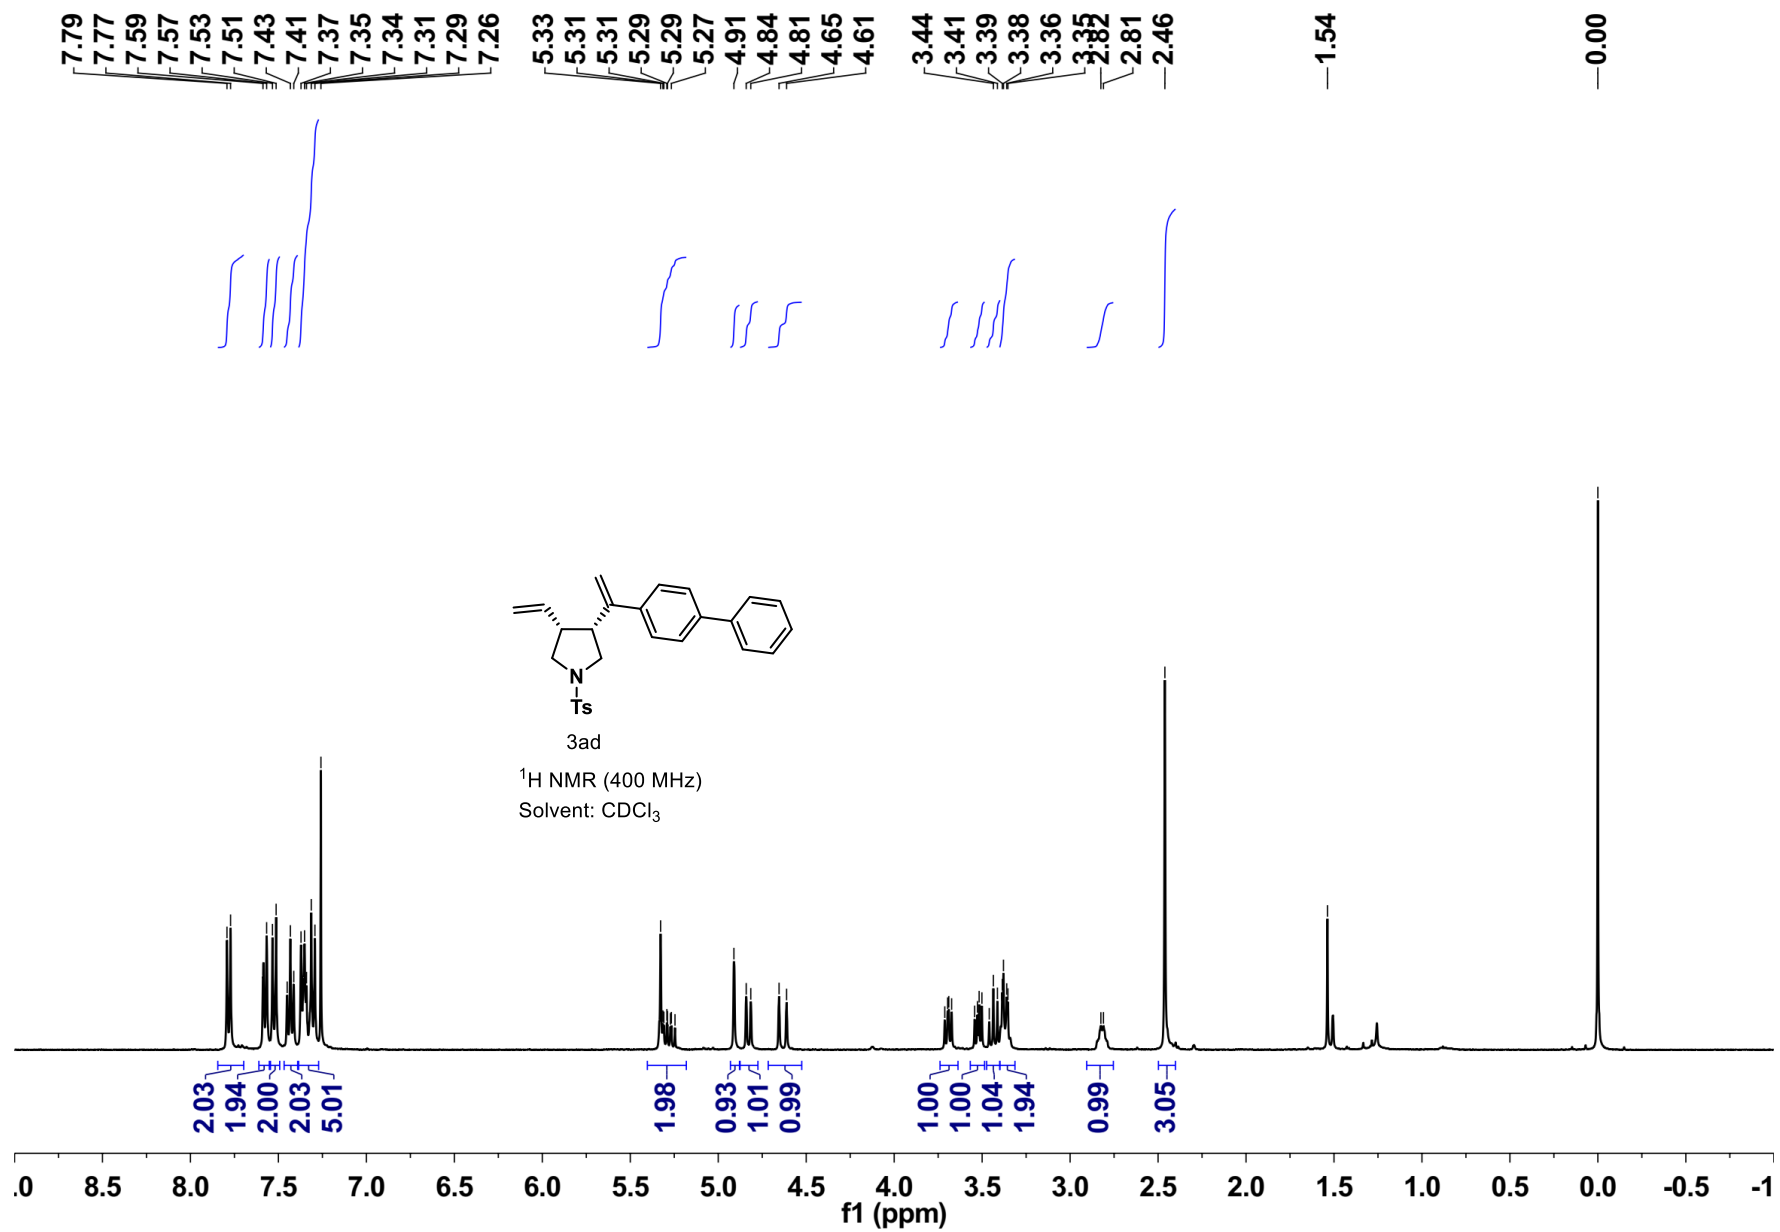

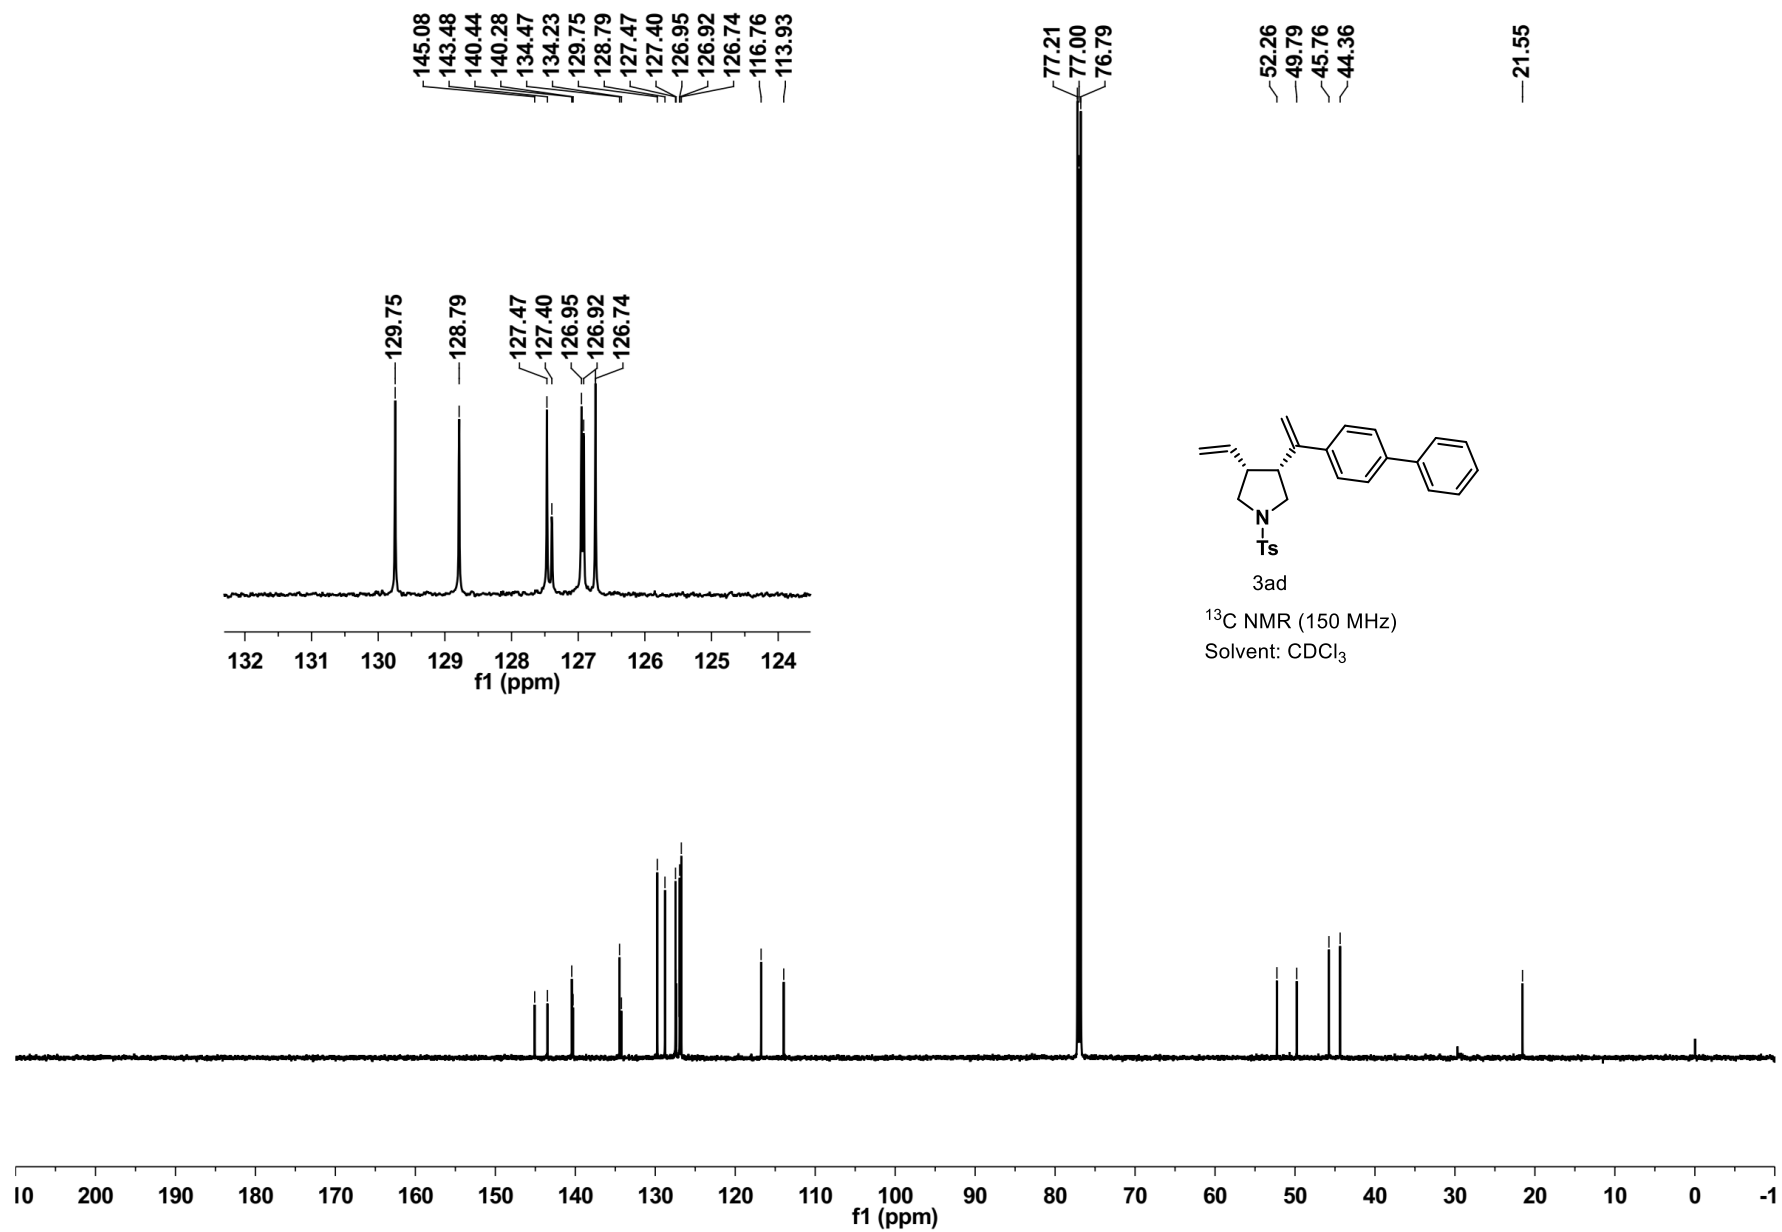

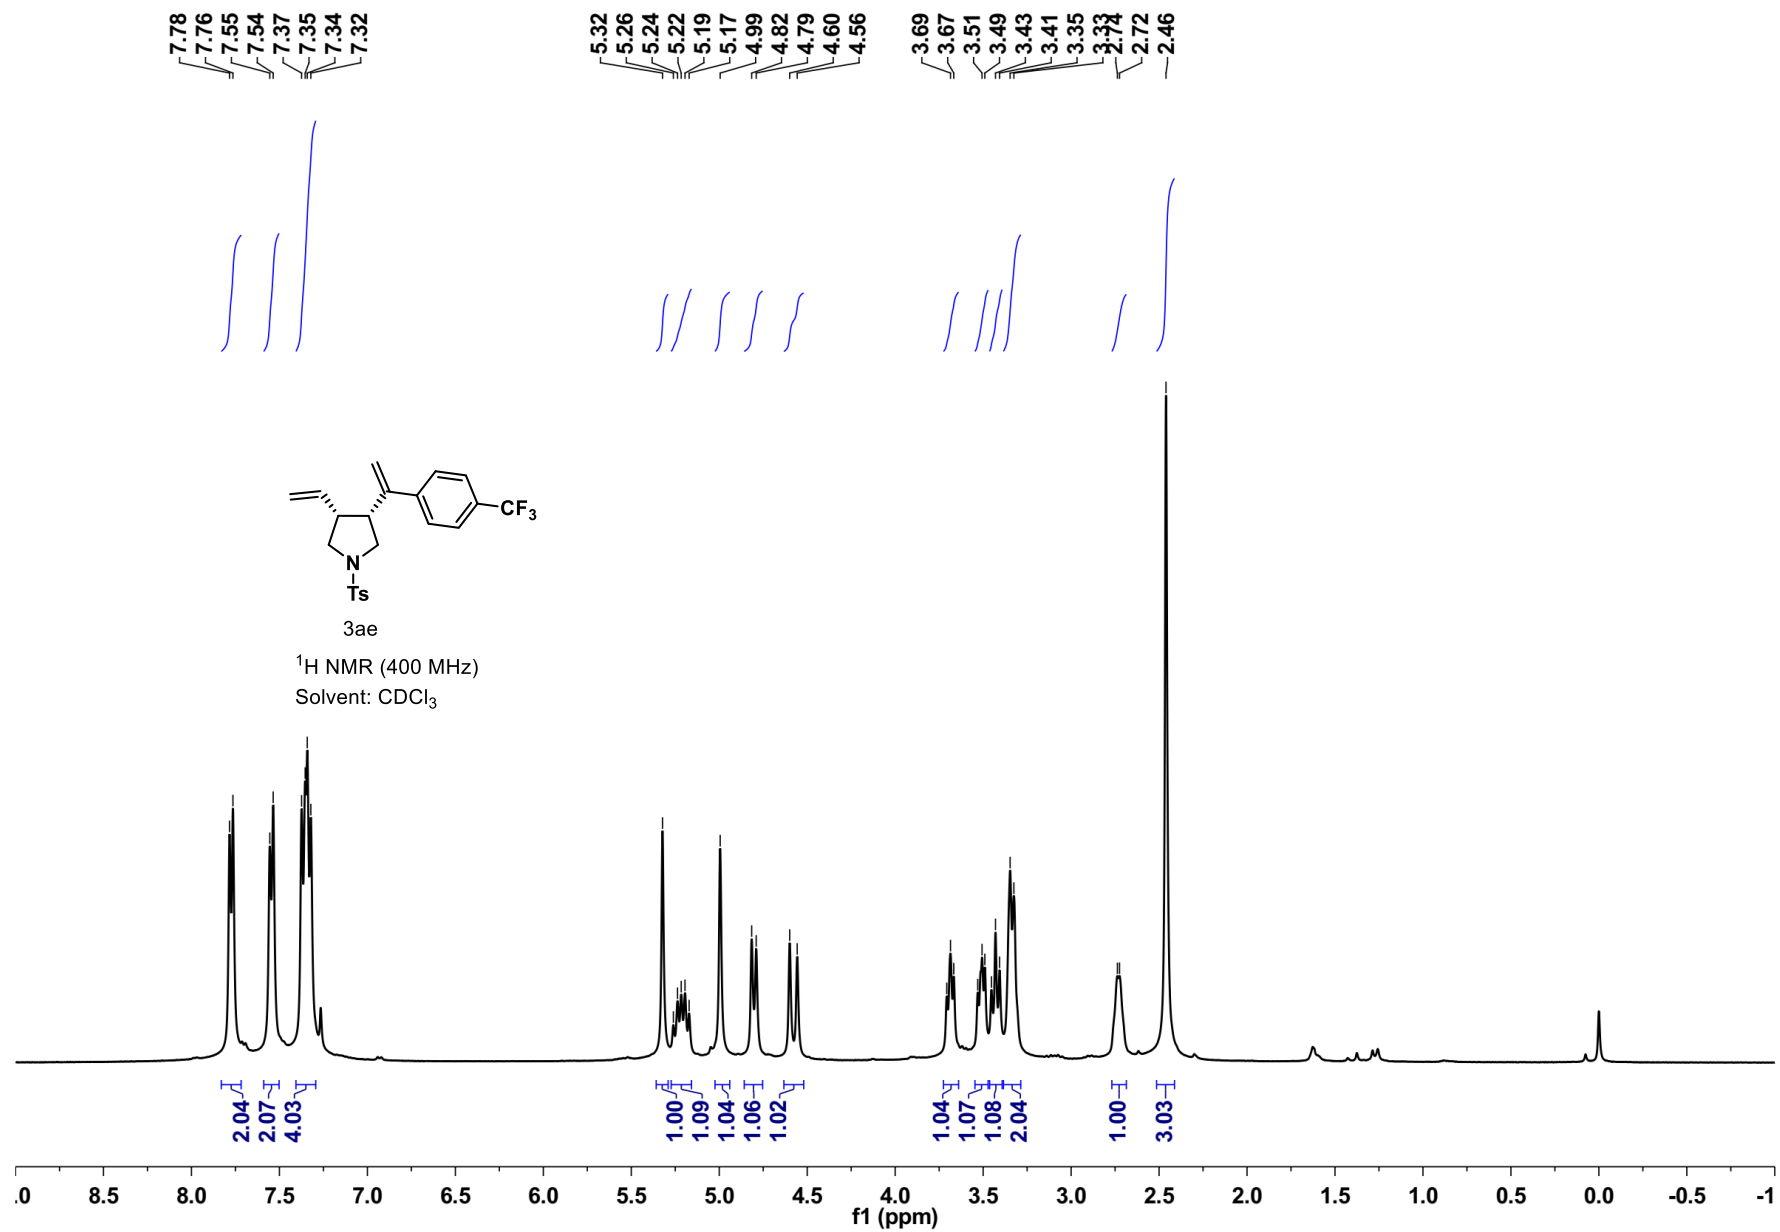

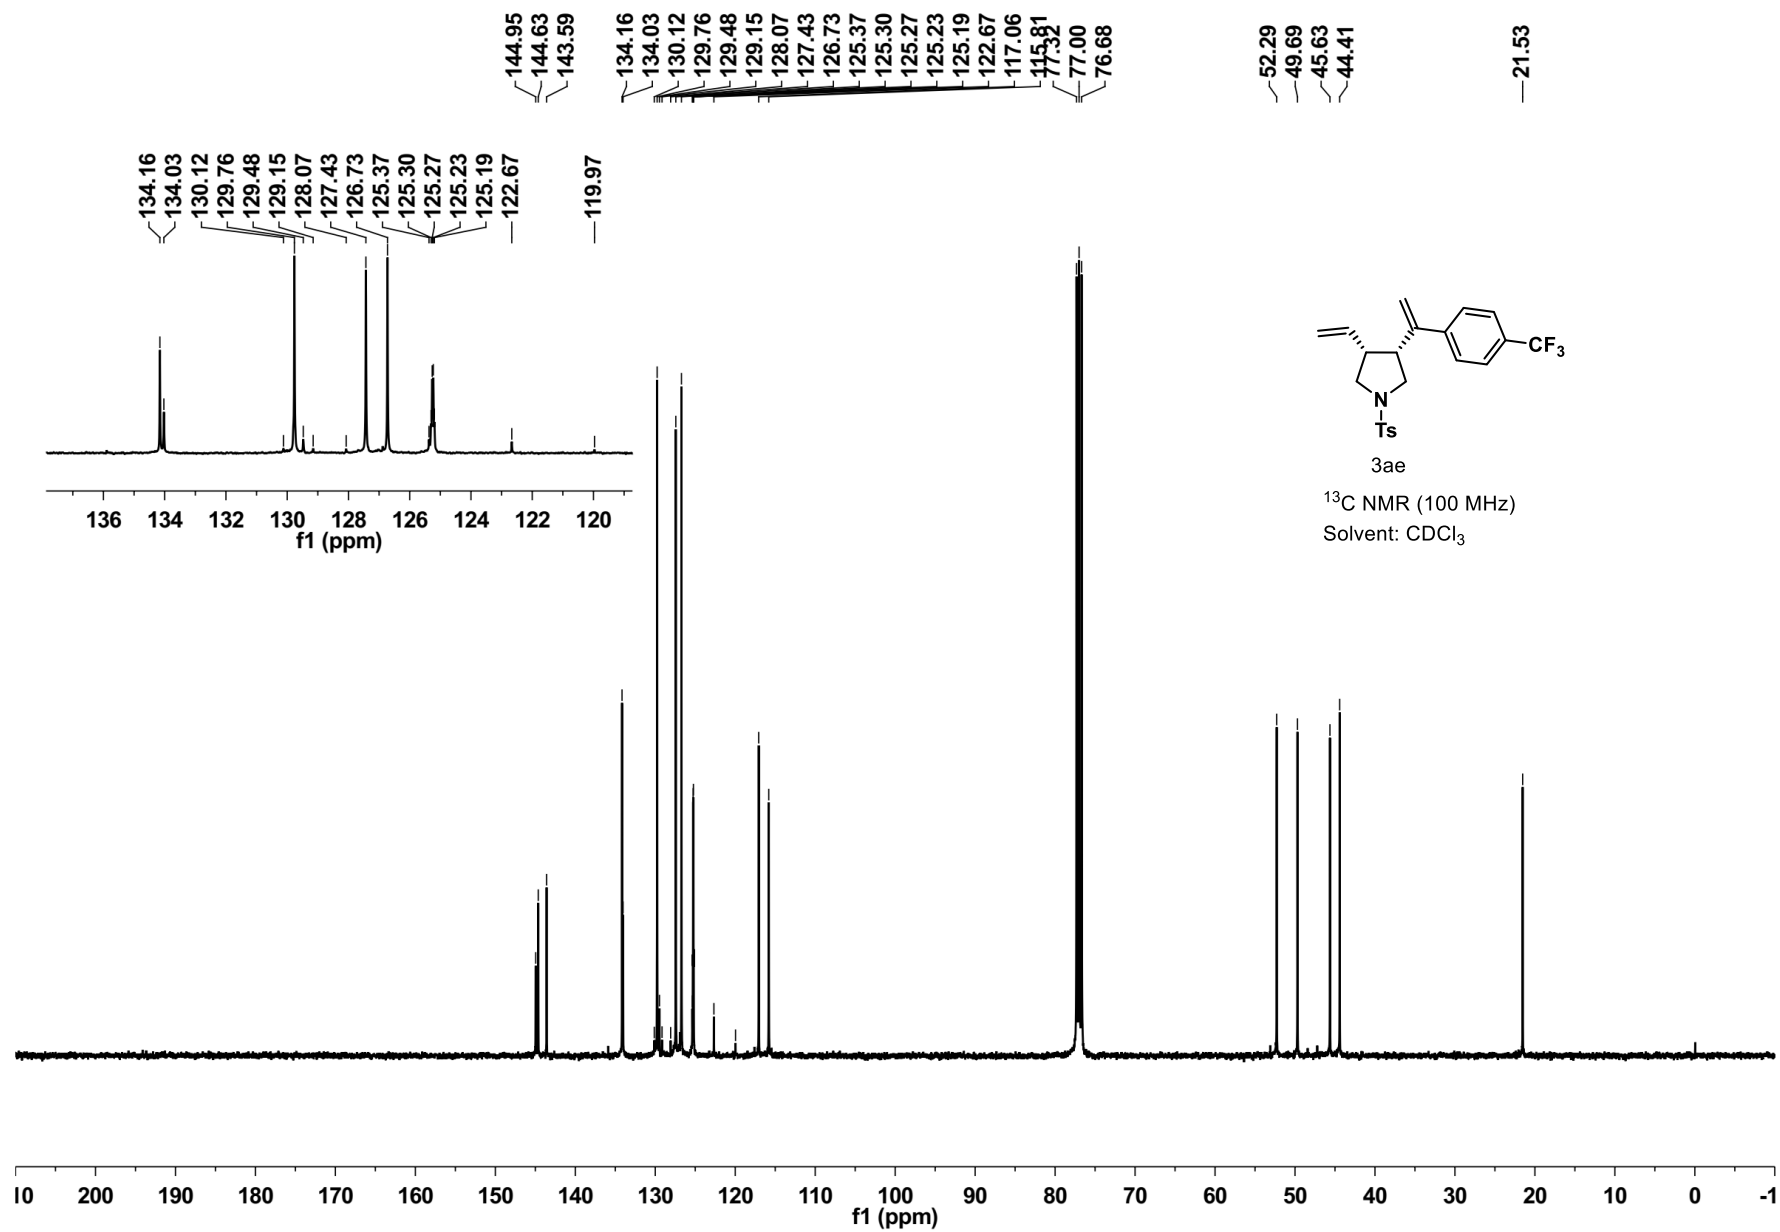

3ae

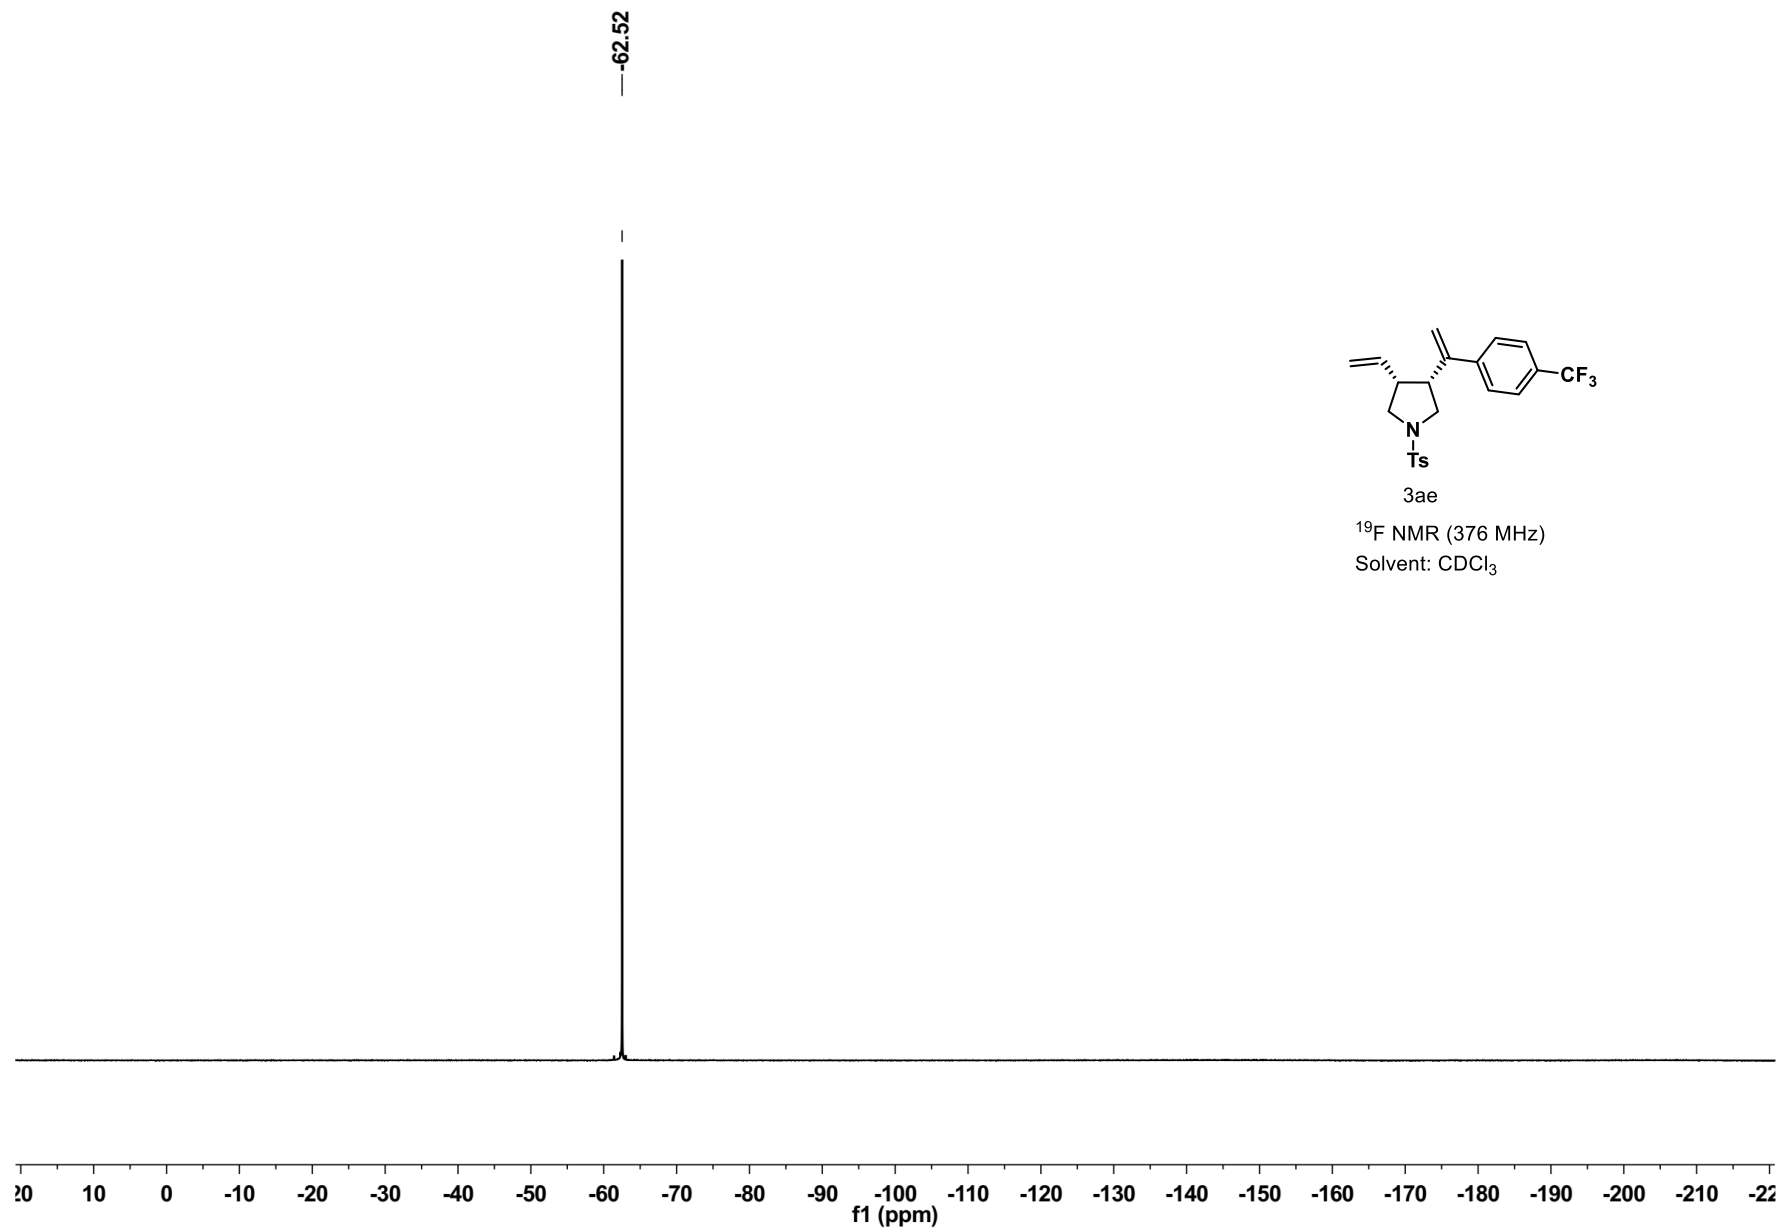

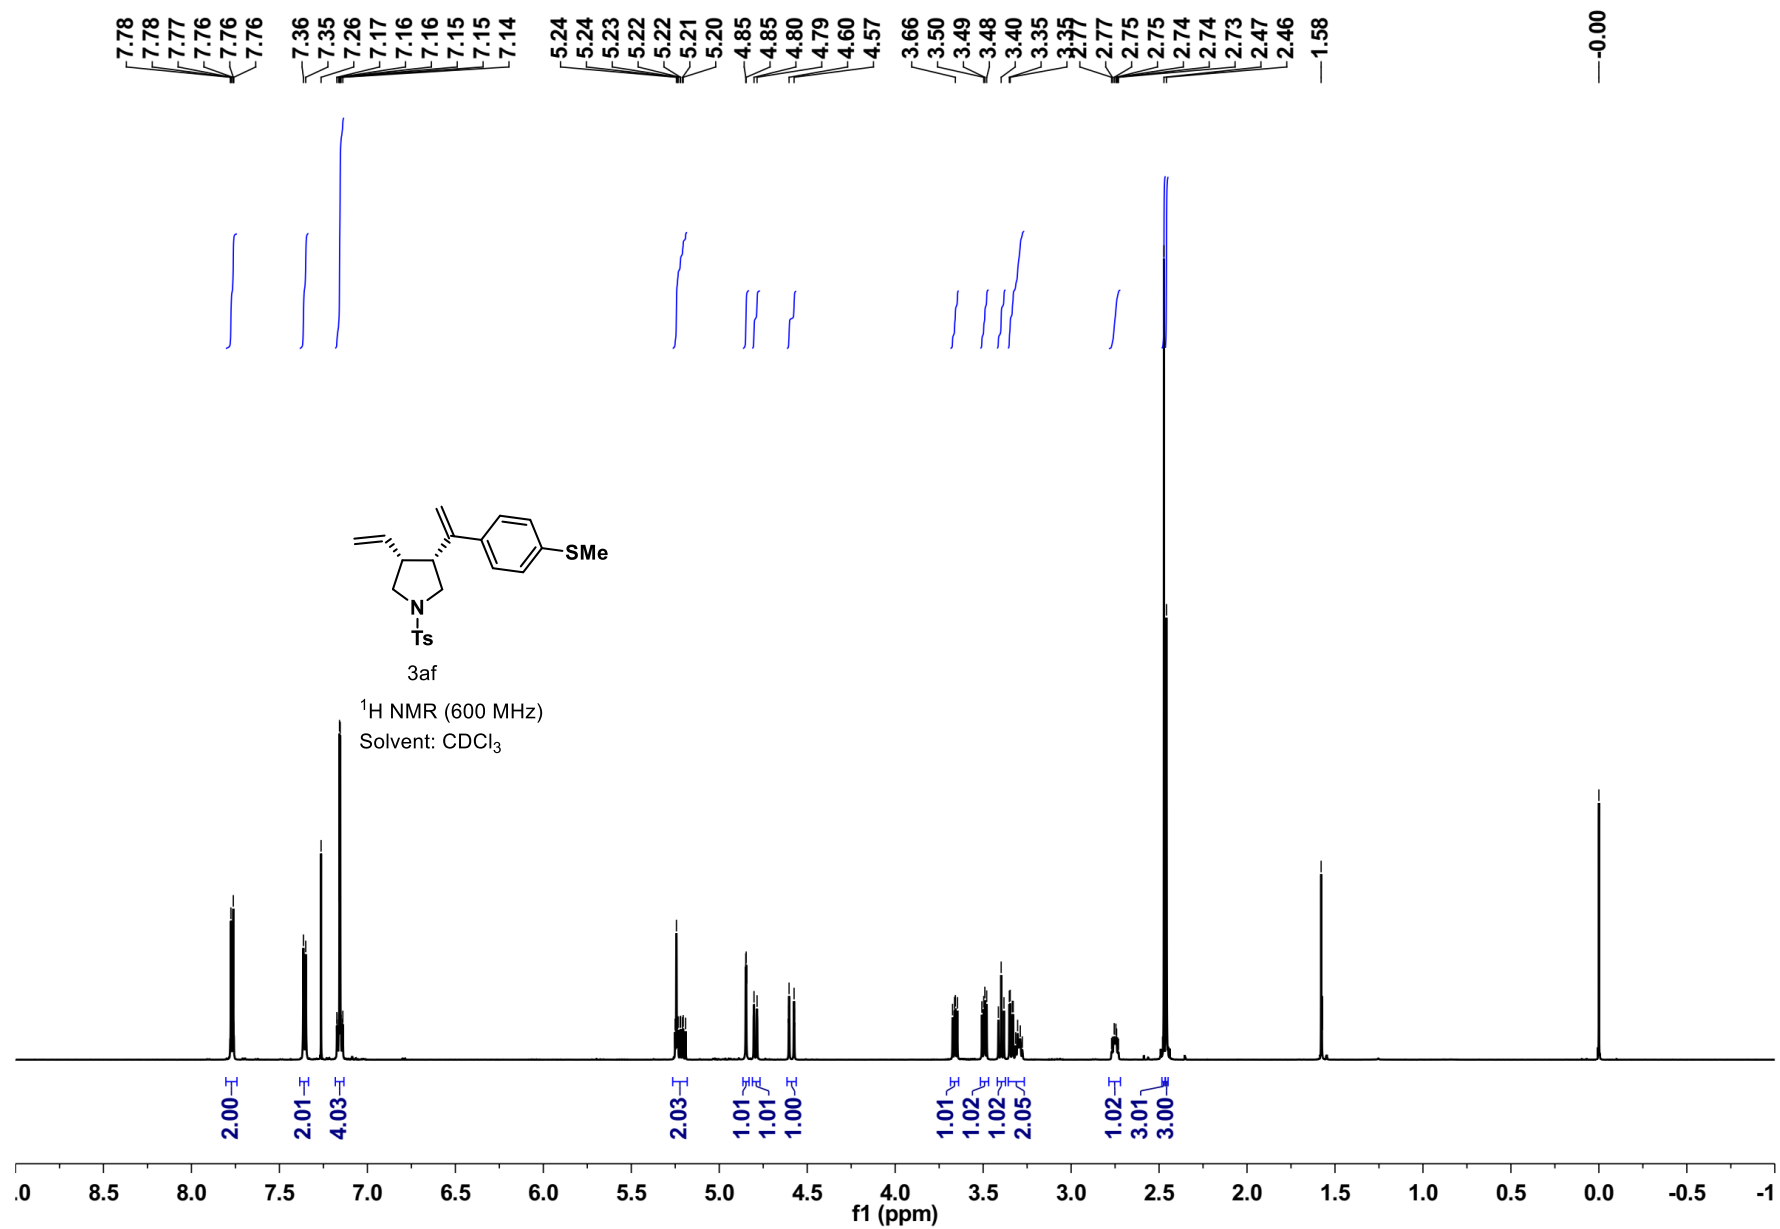



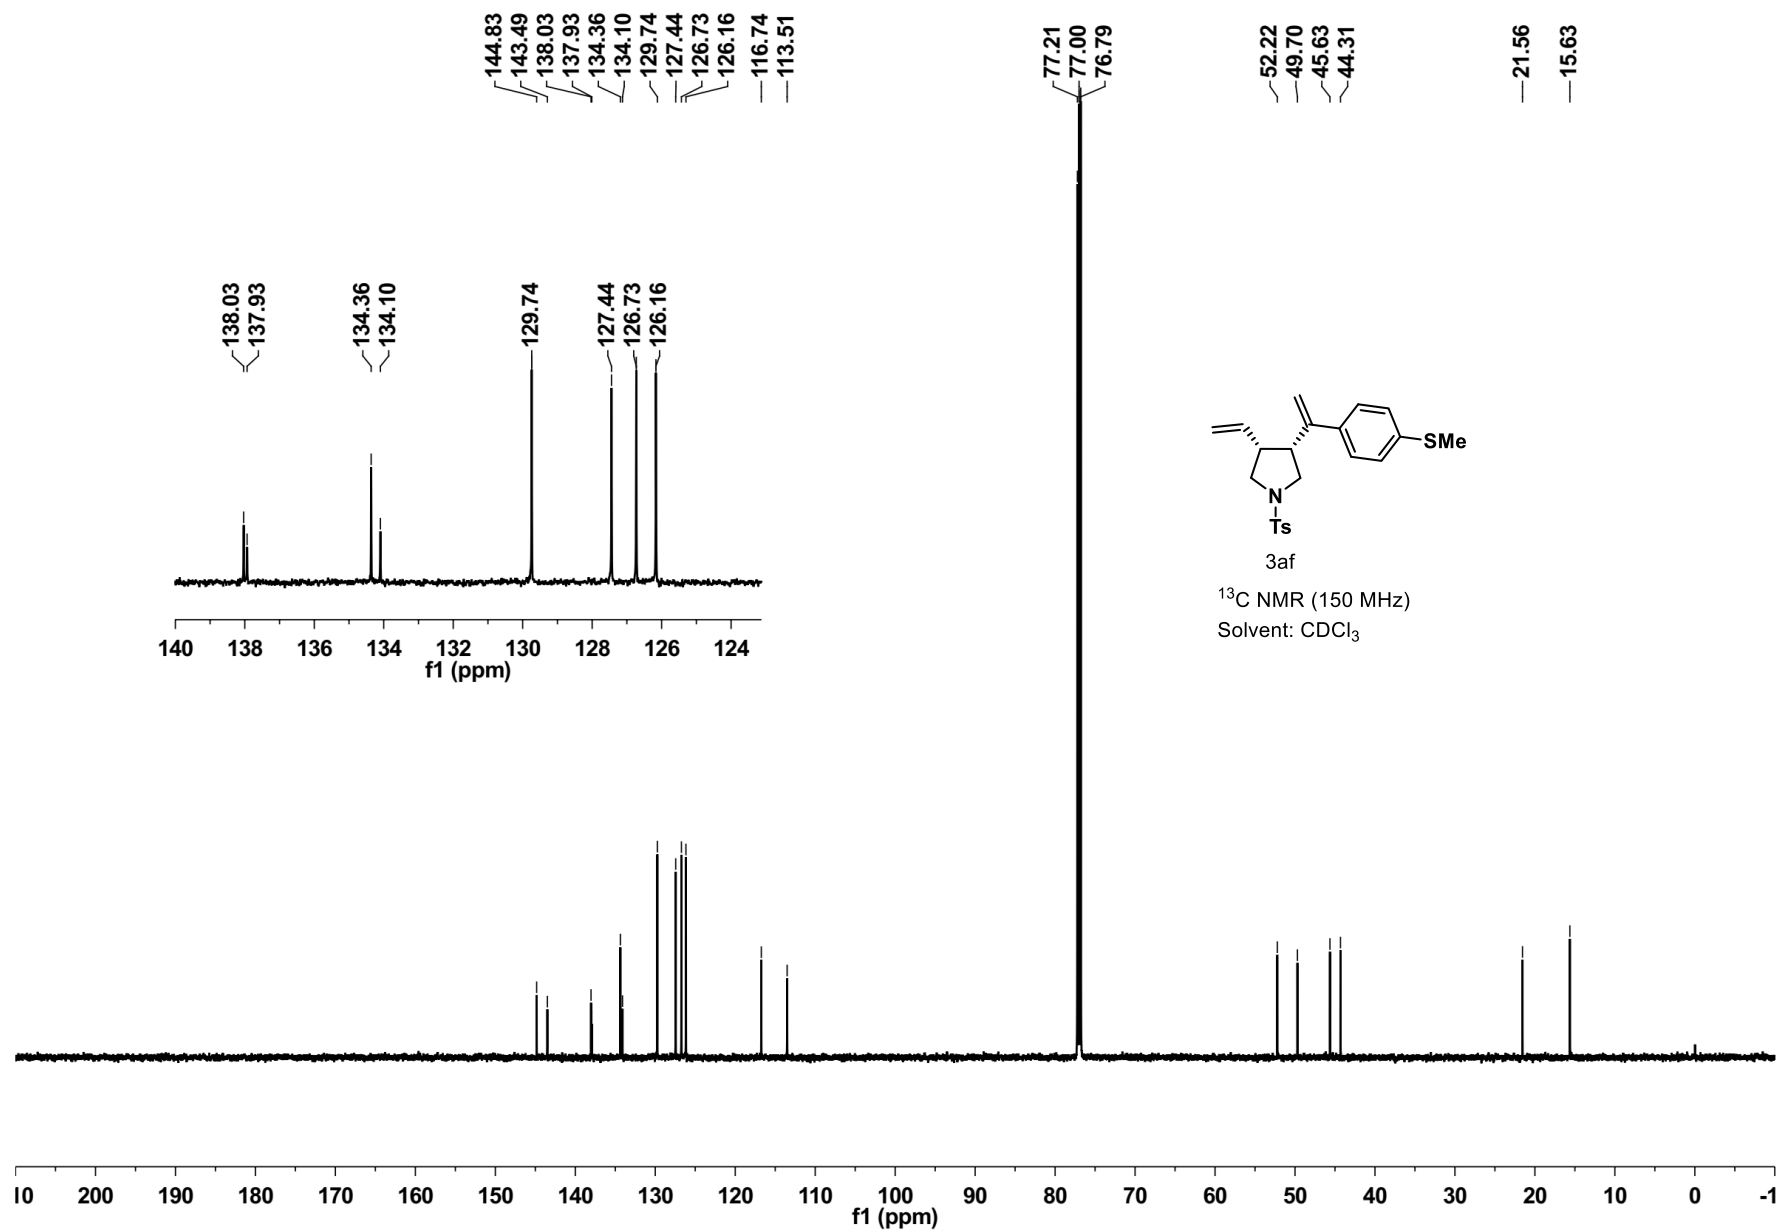

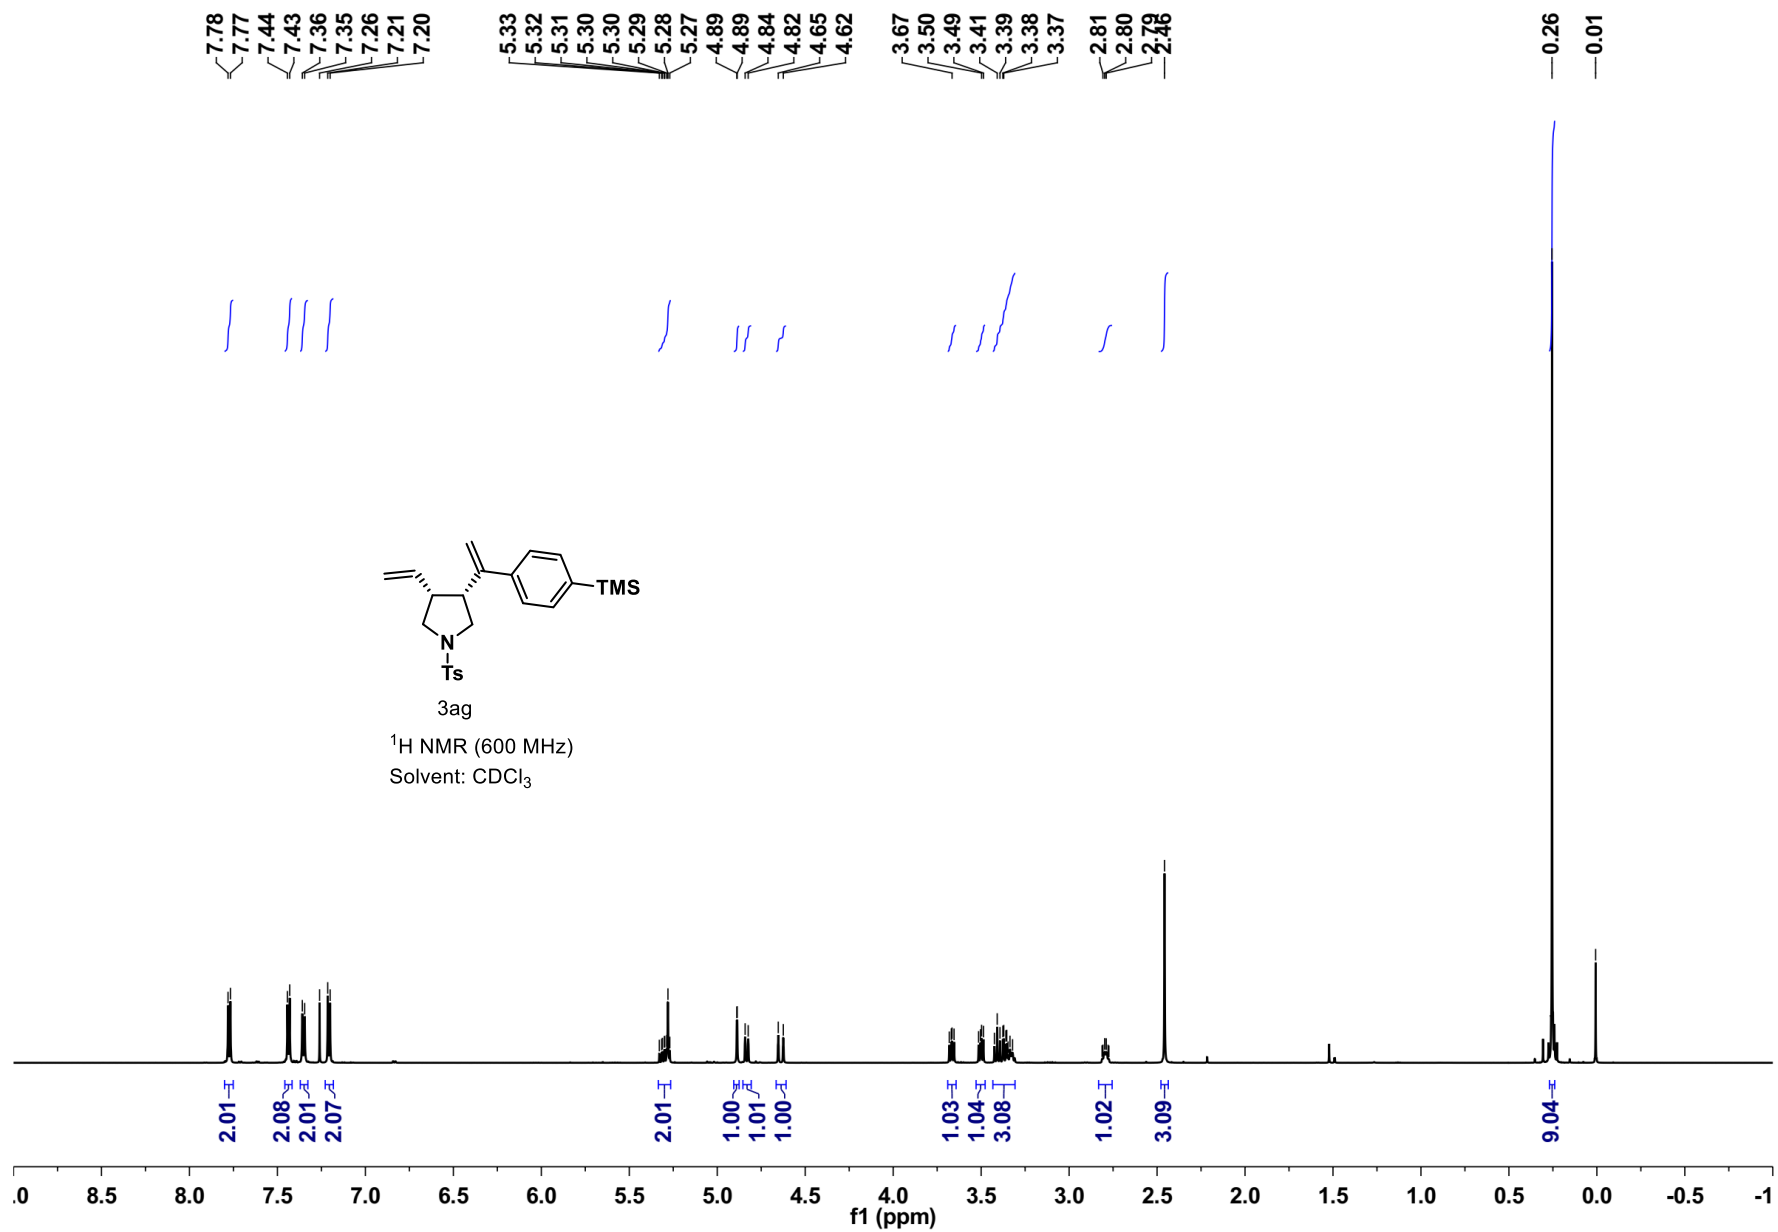

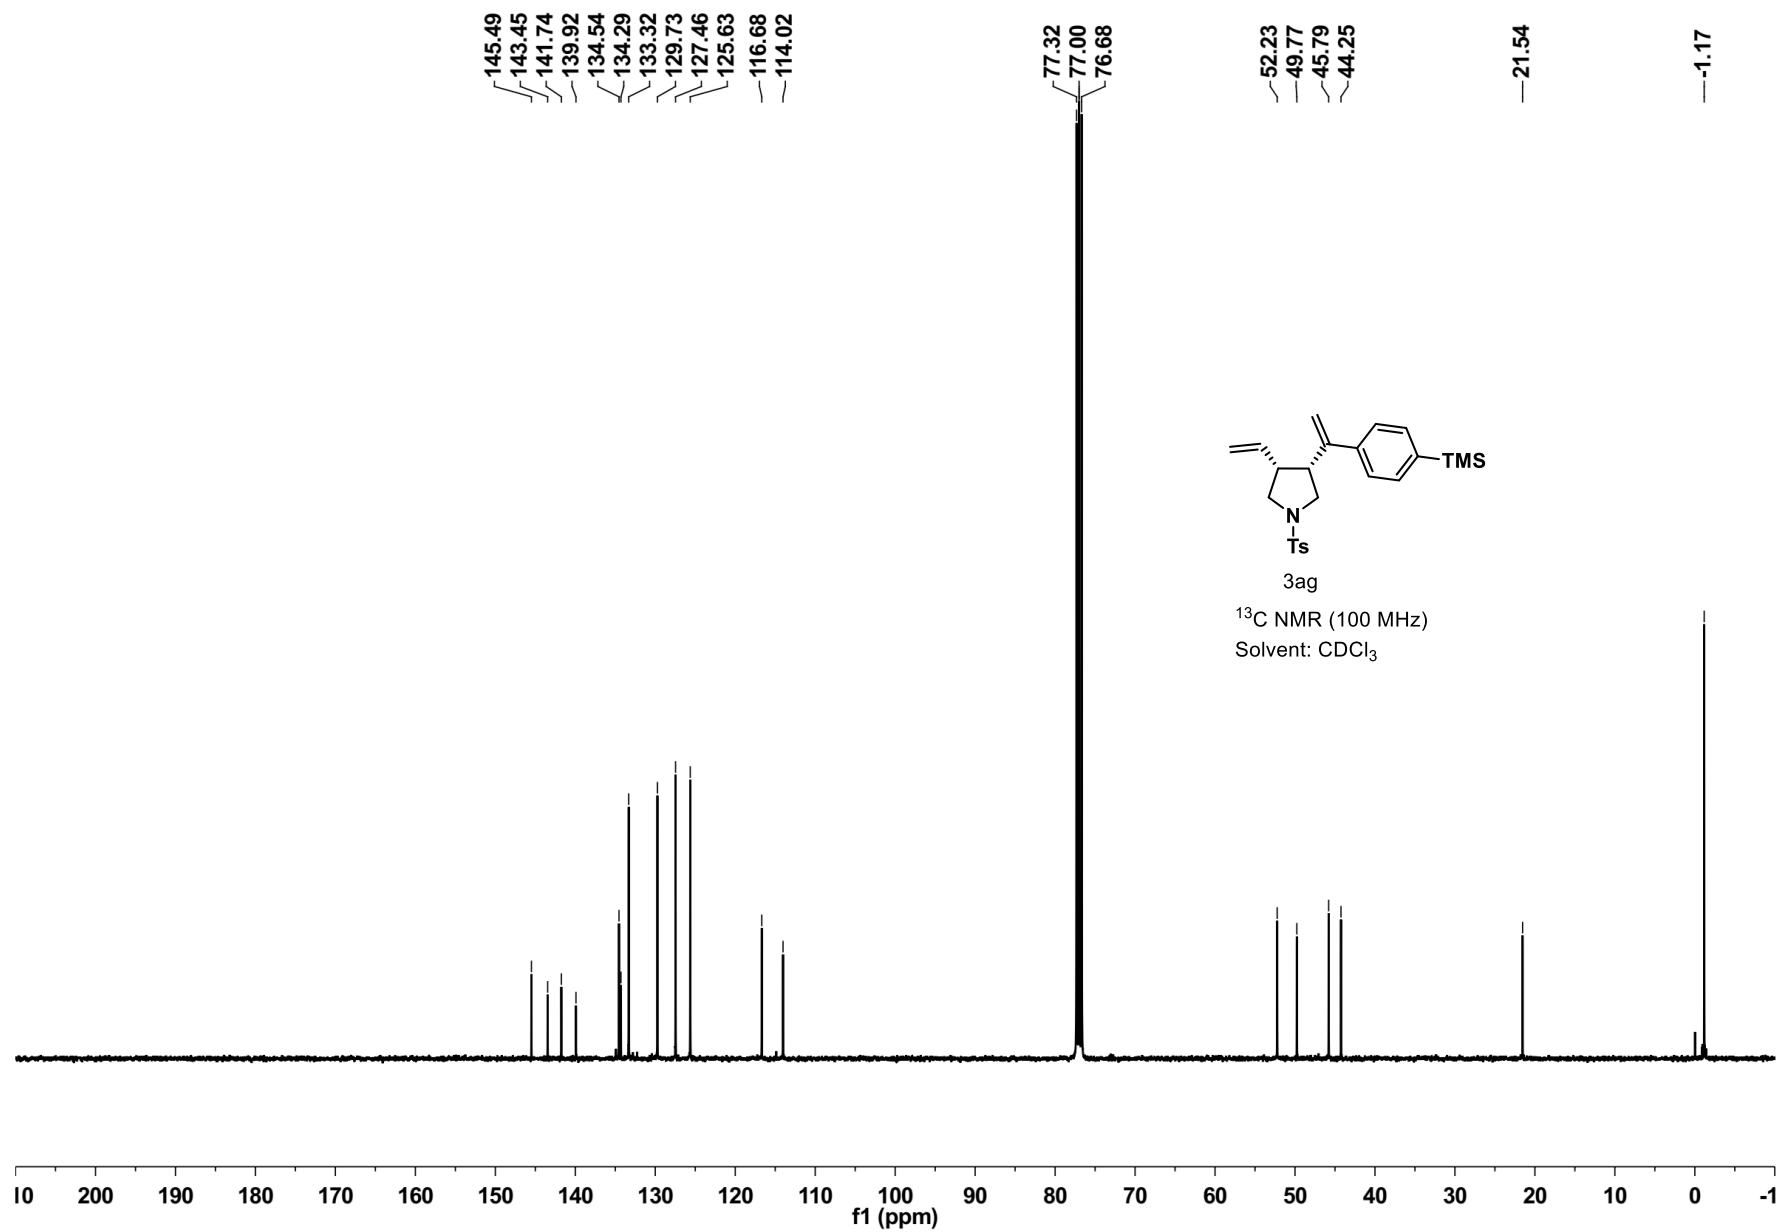

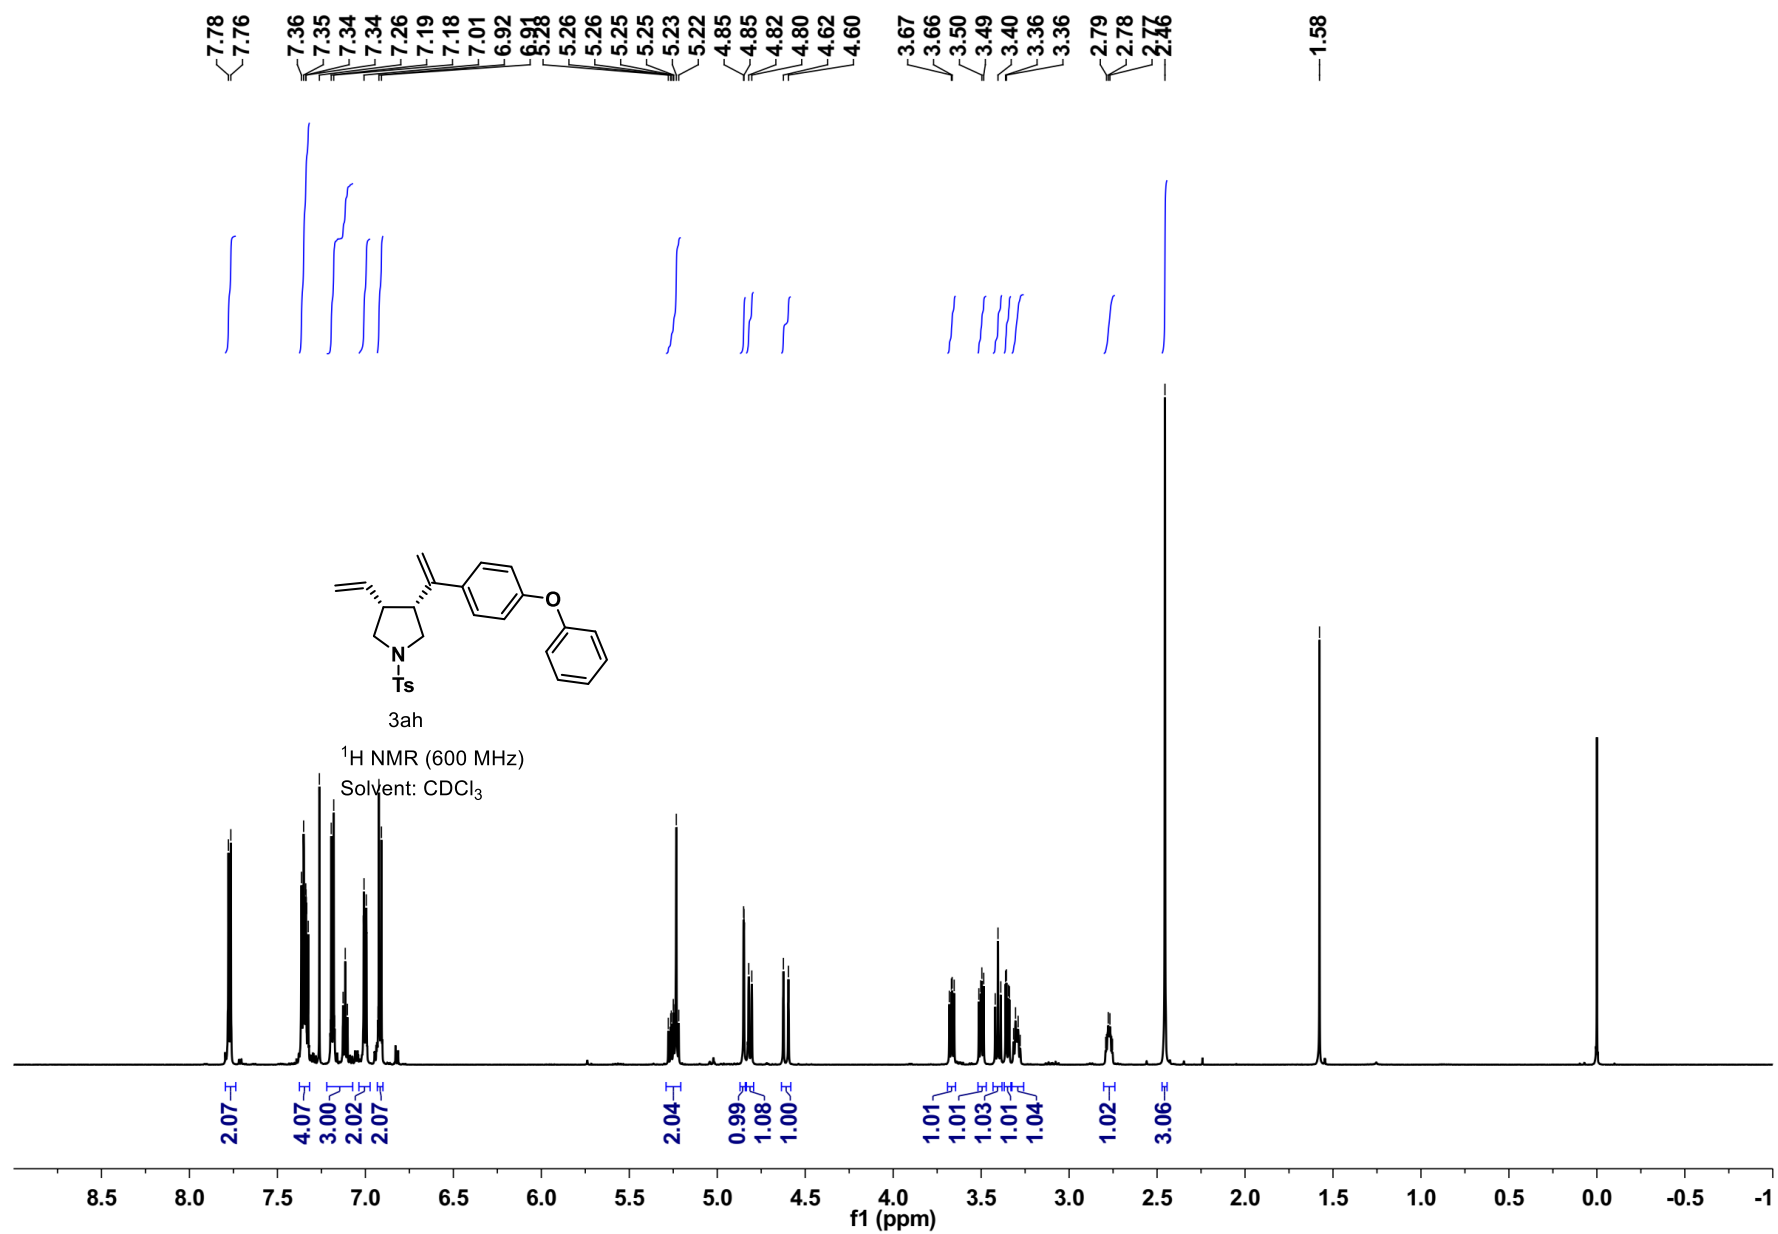

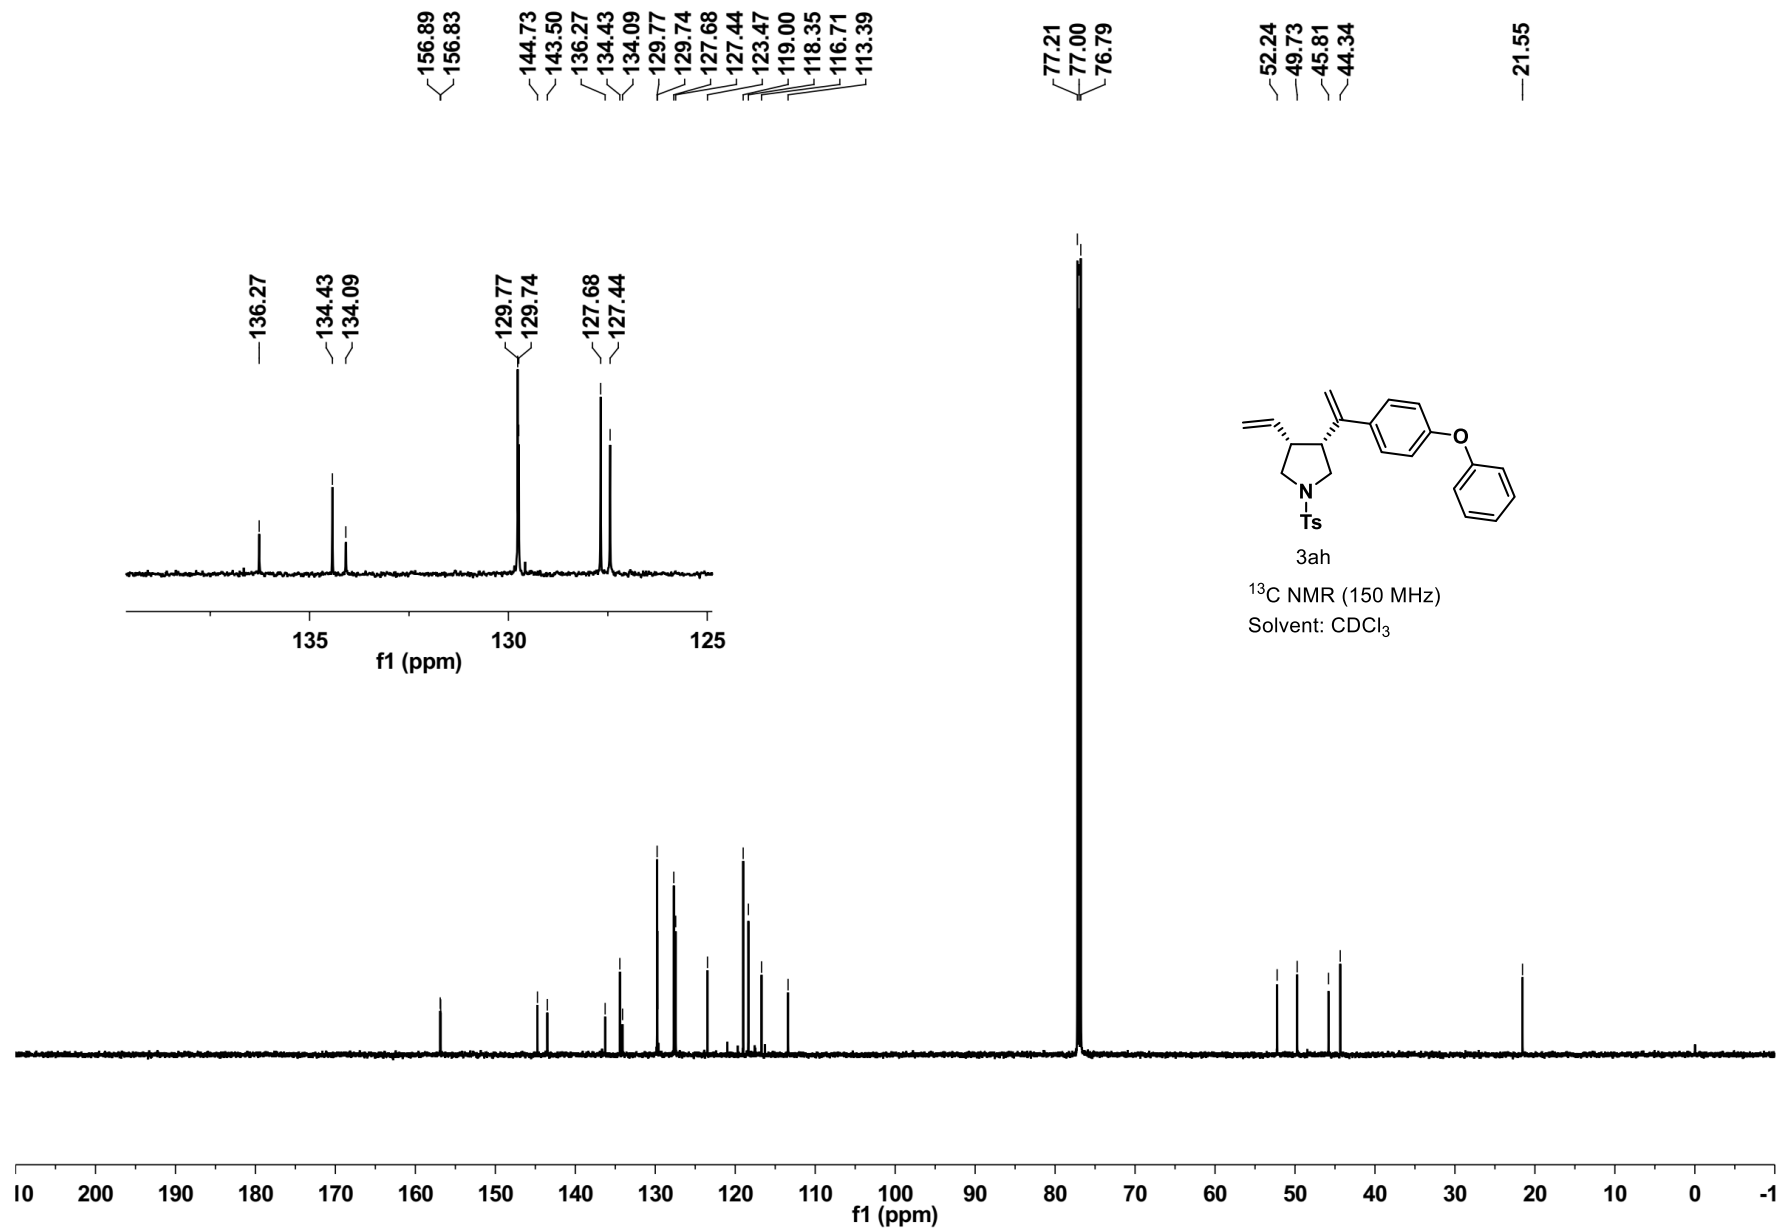

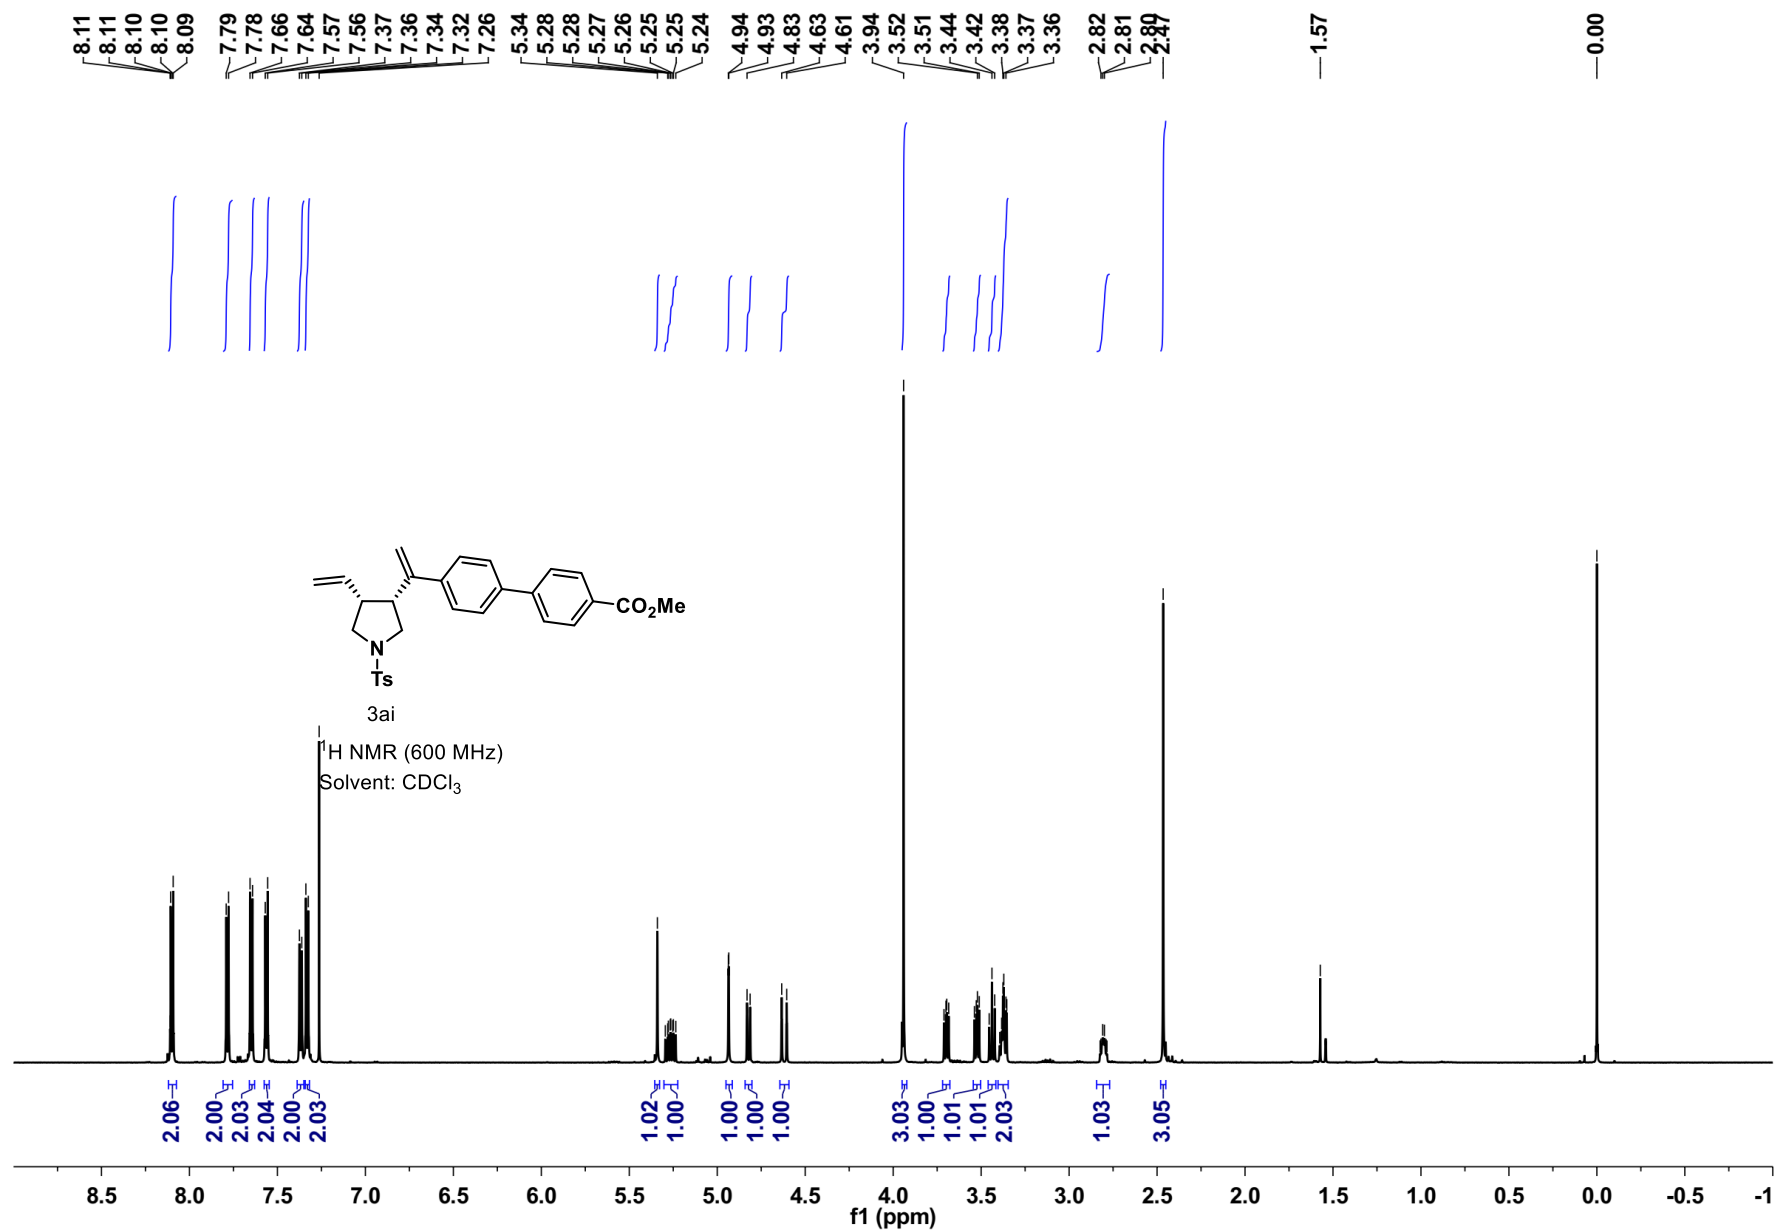

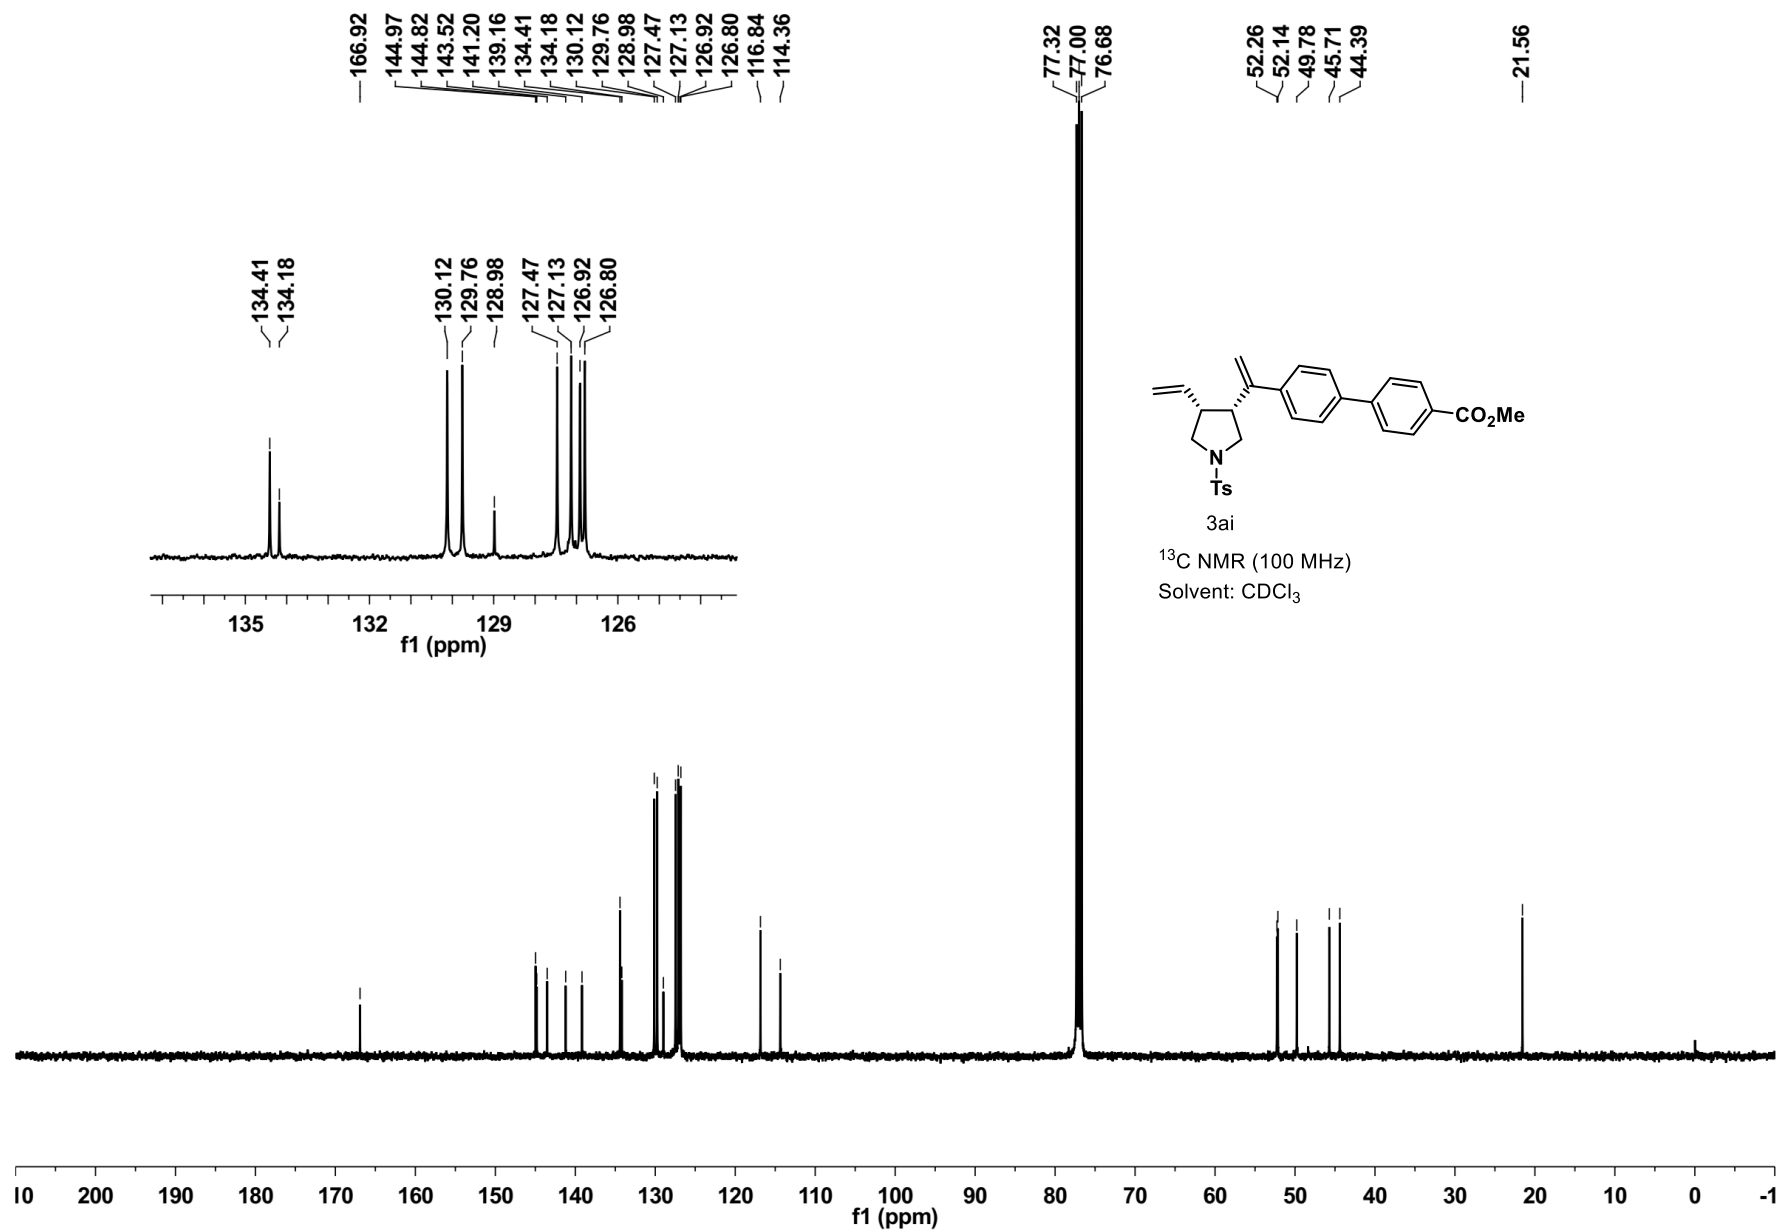

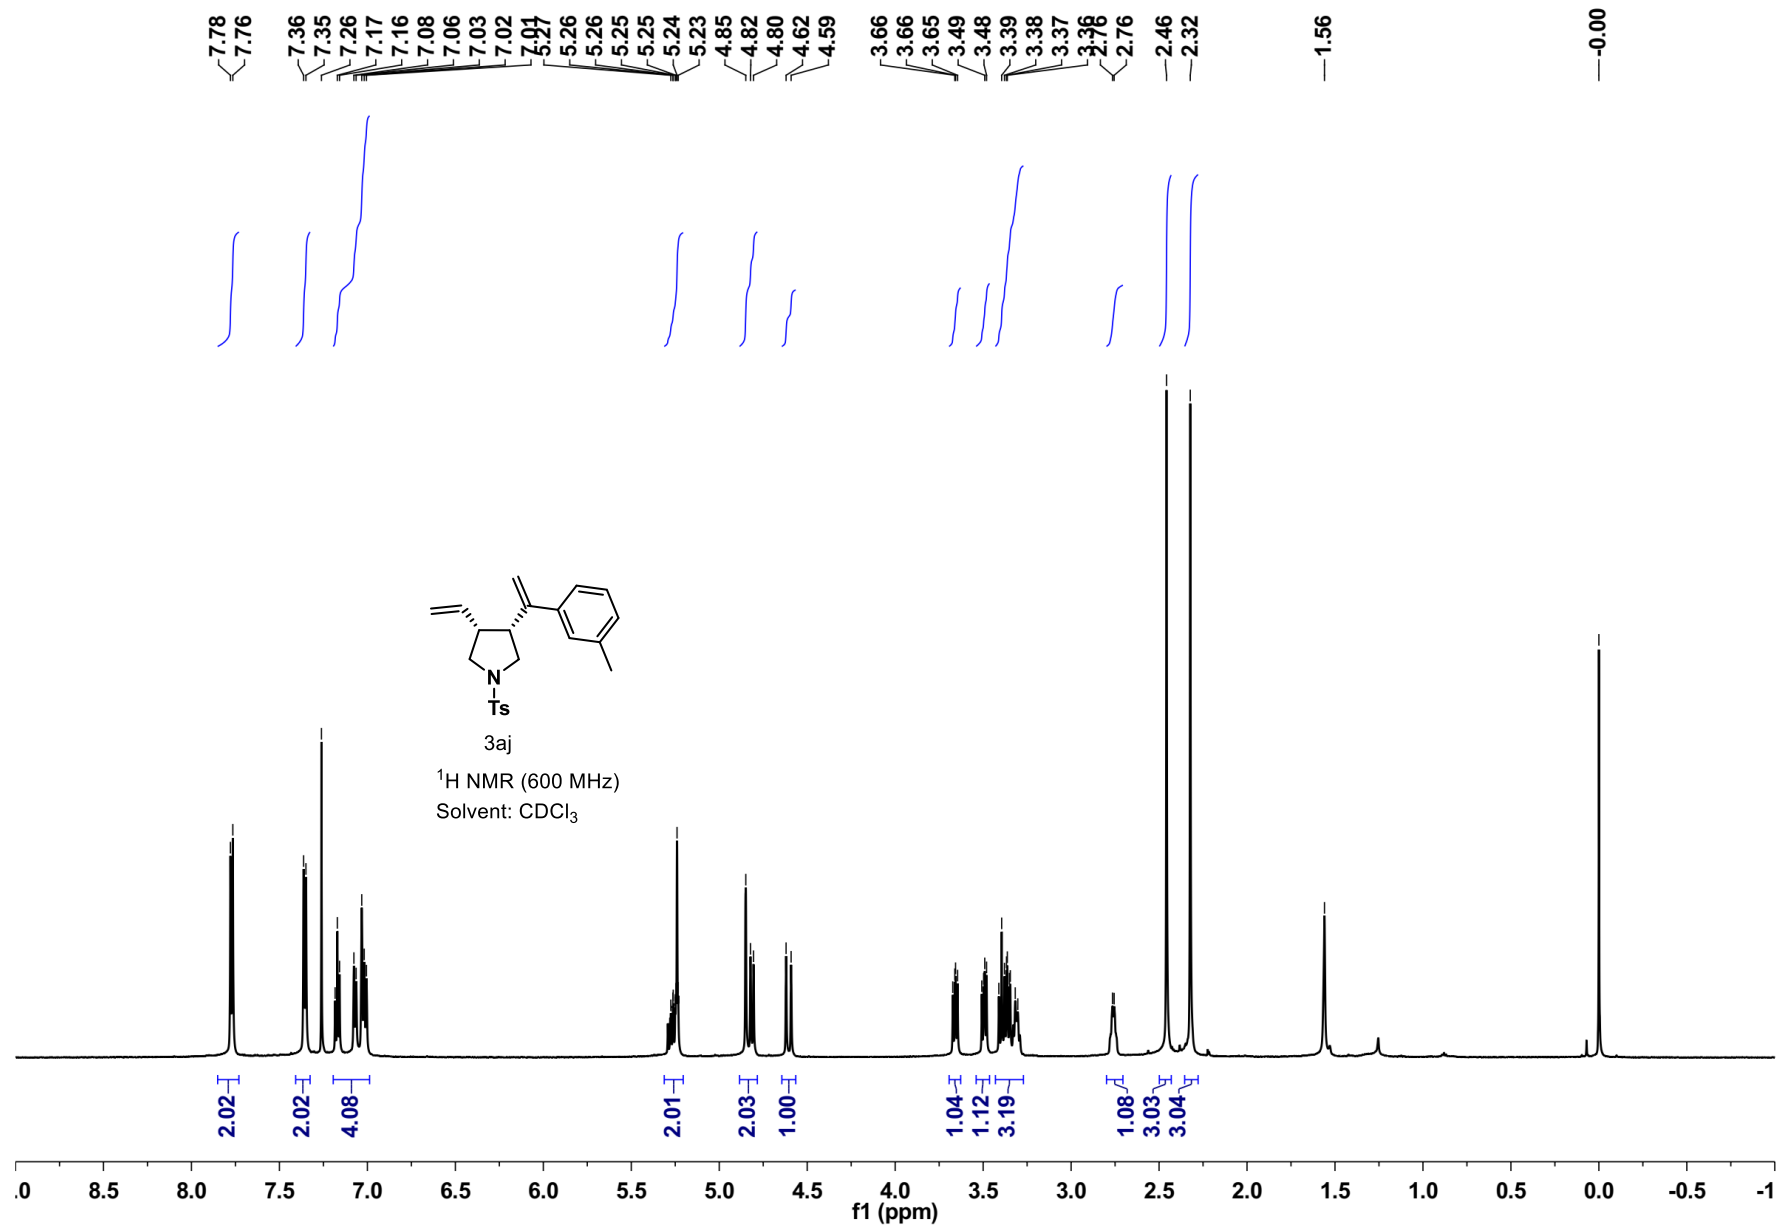



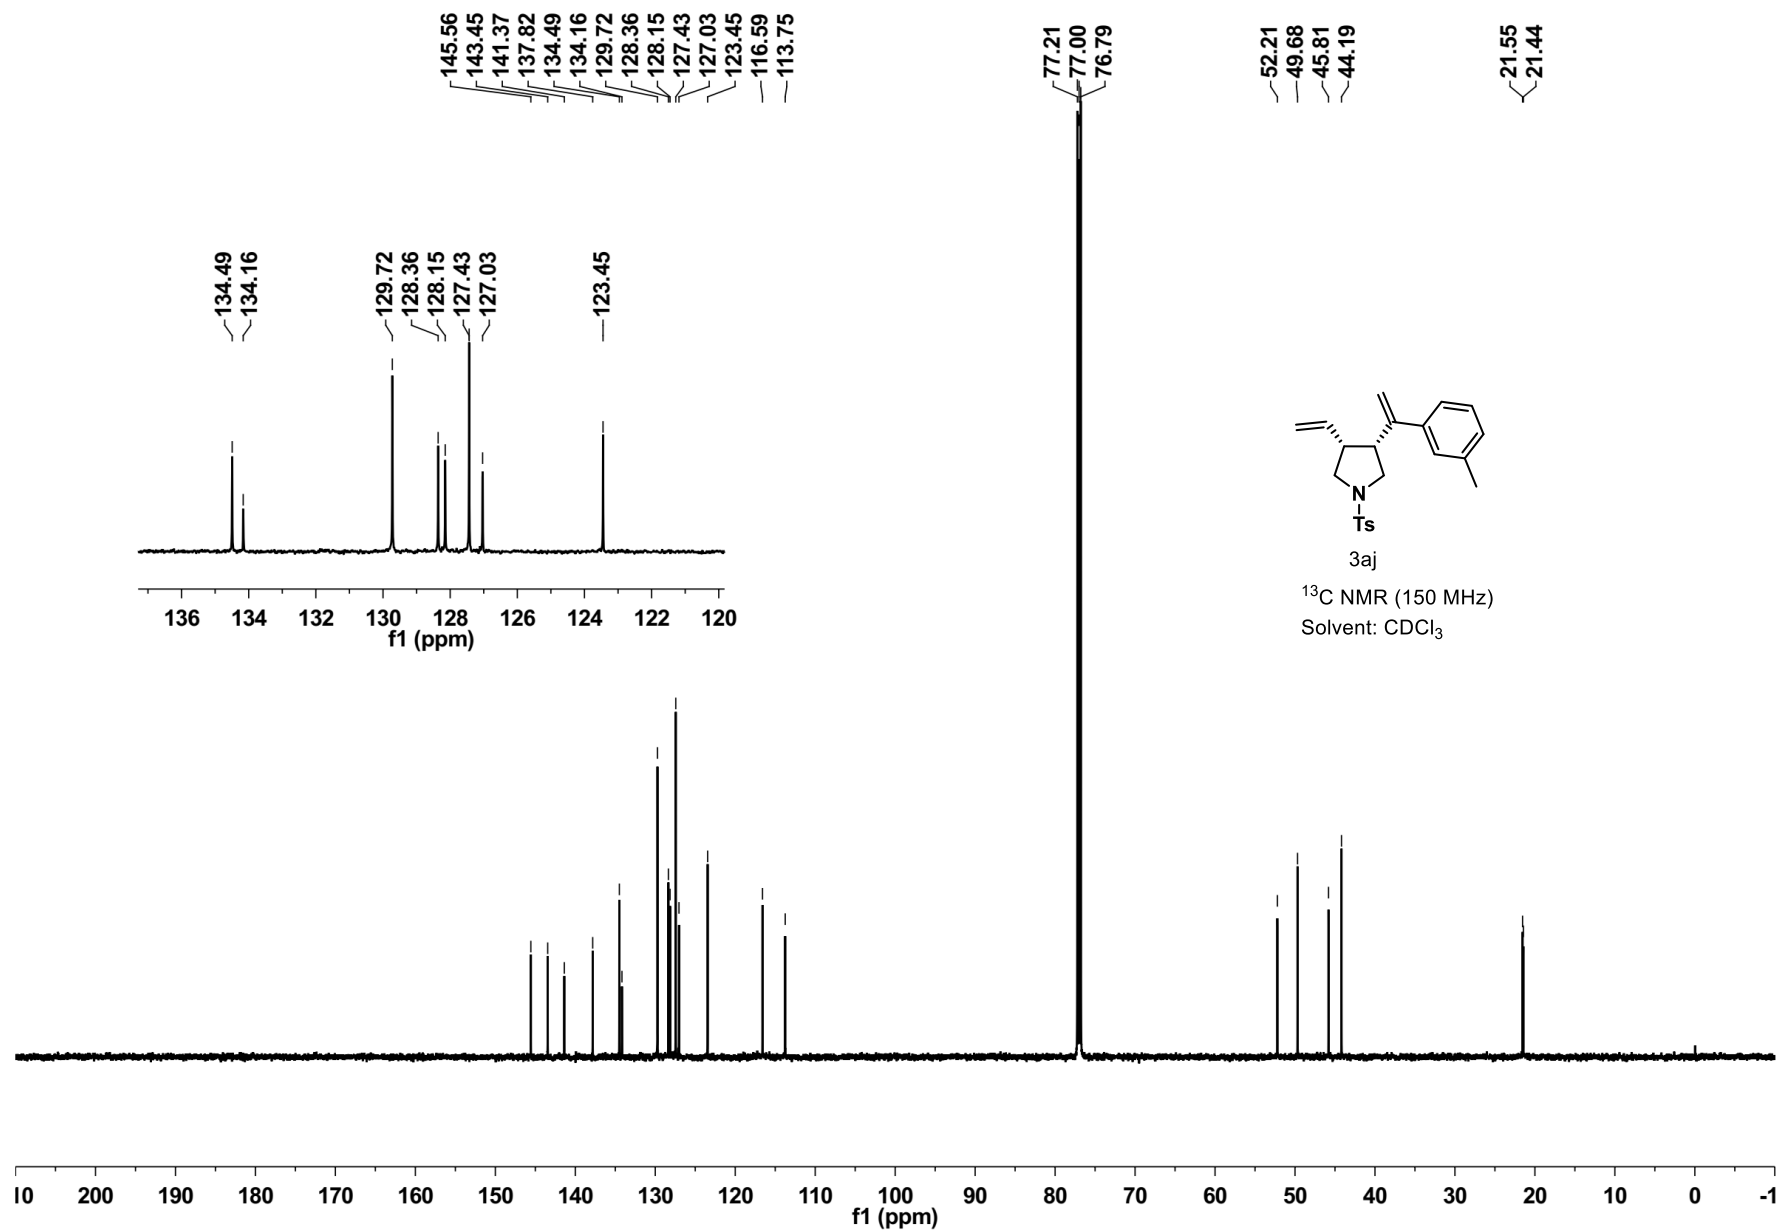

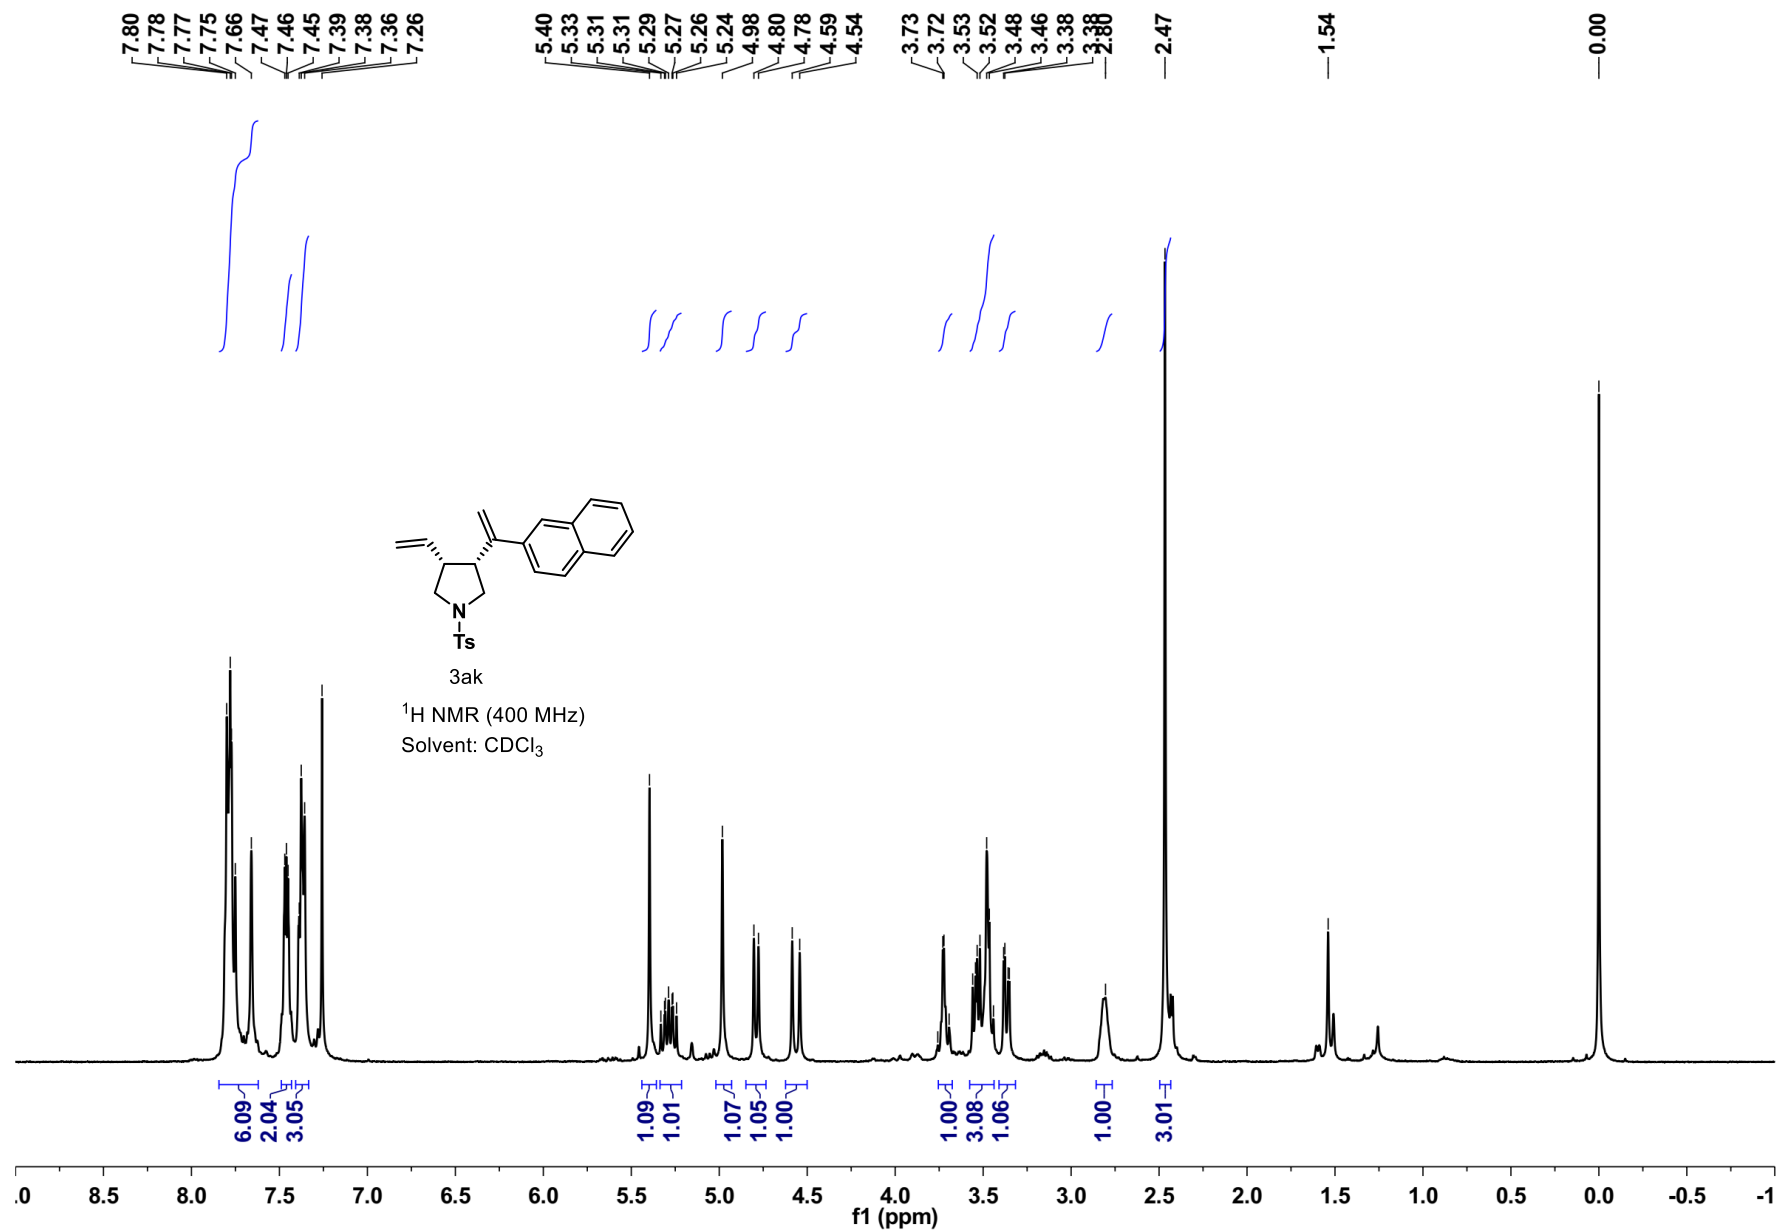

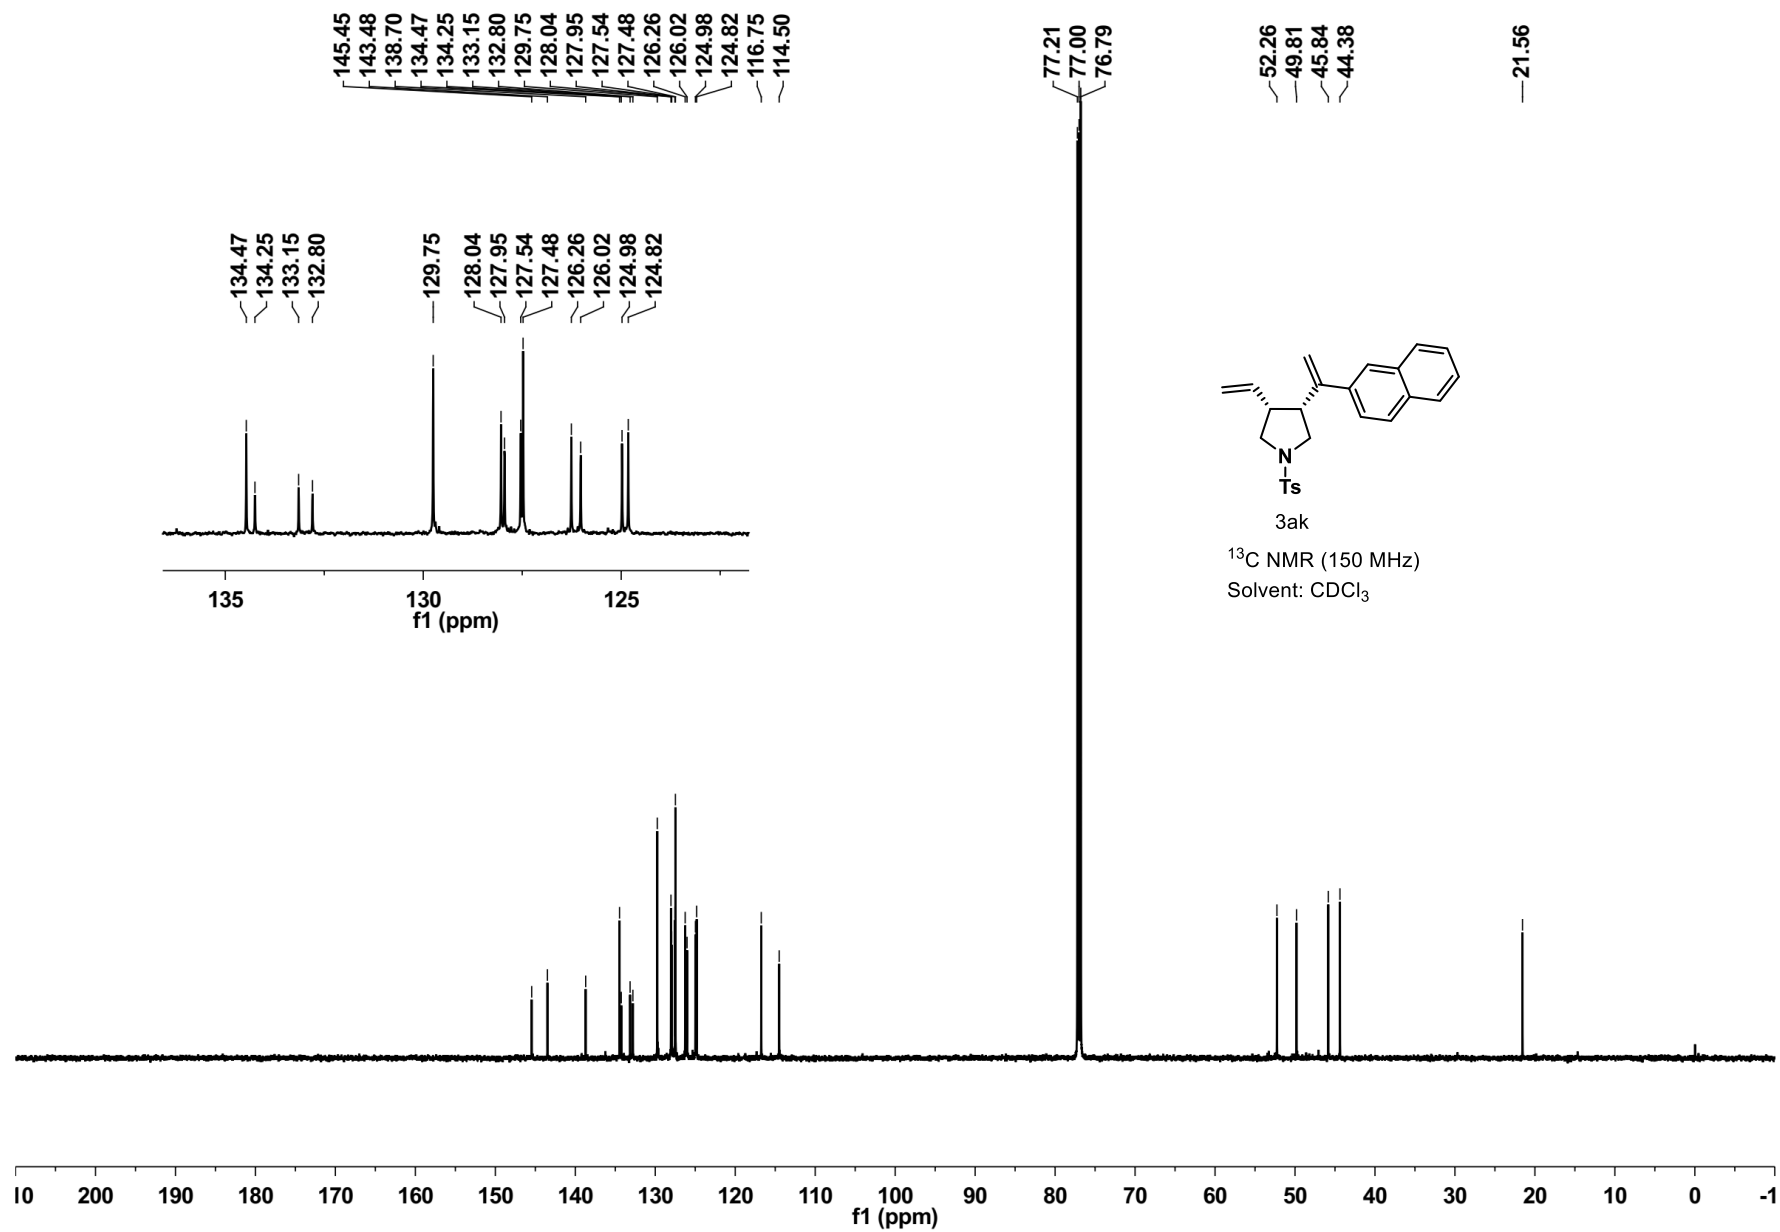

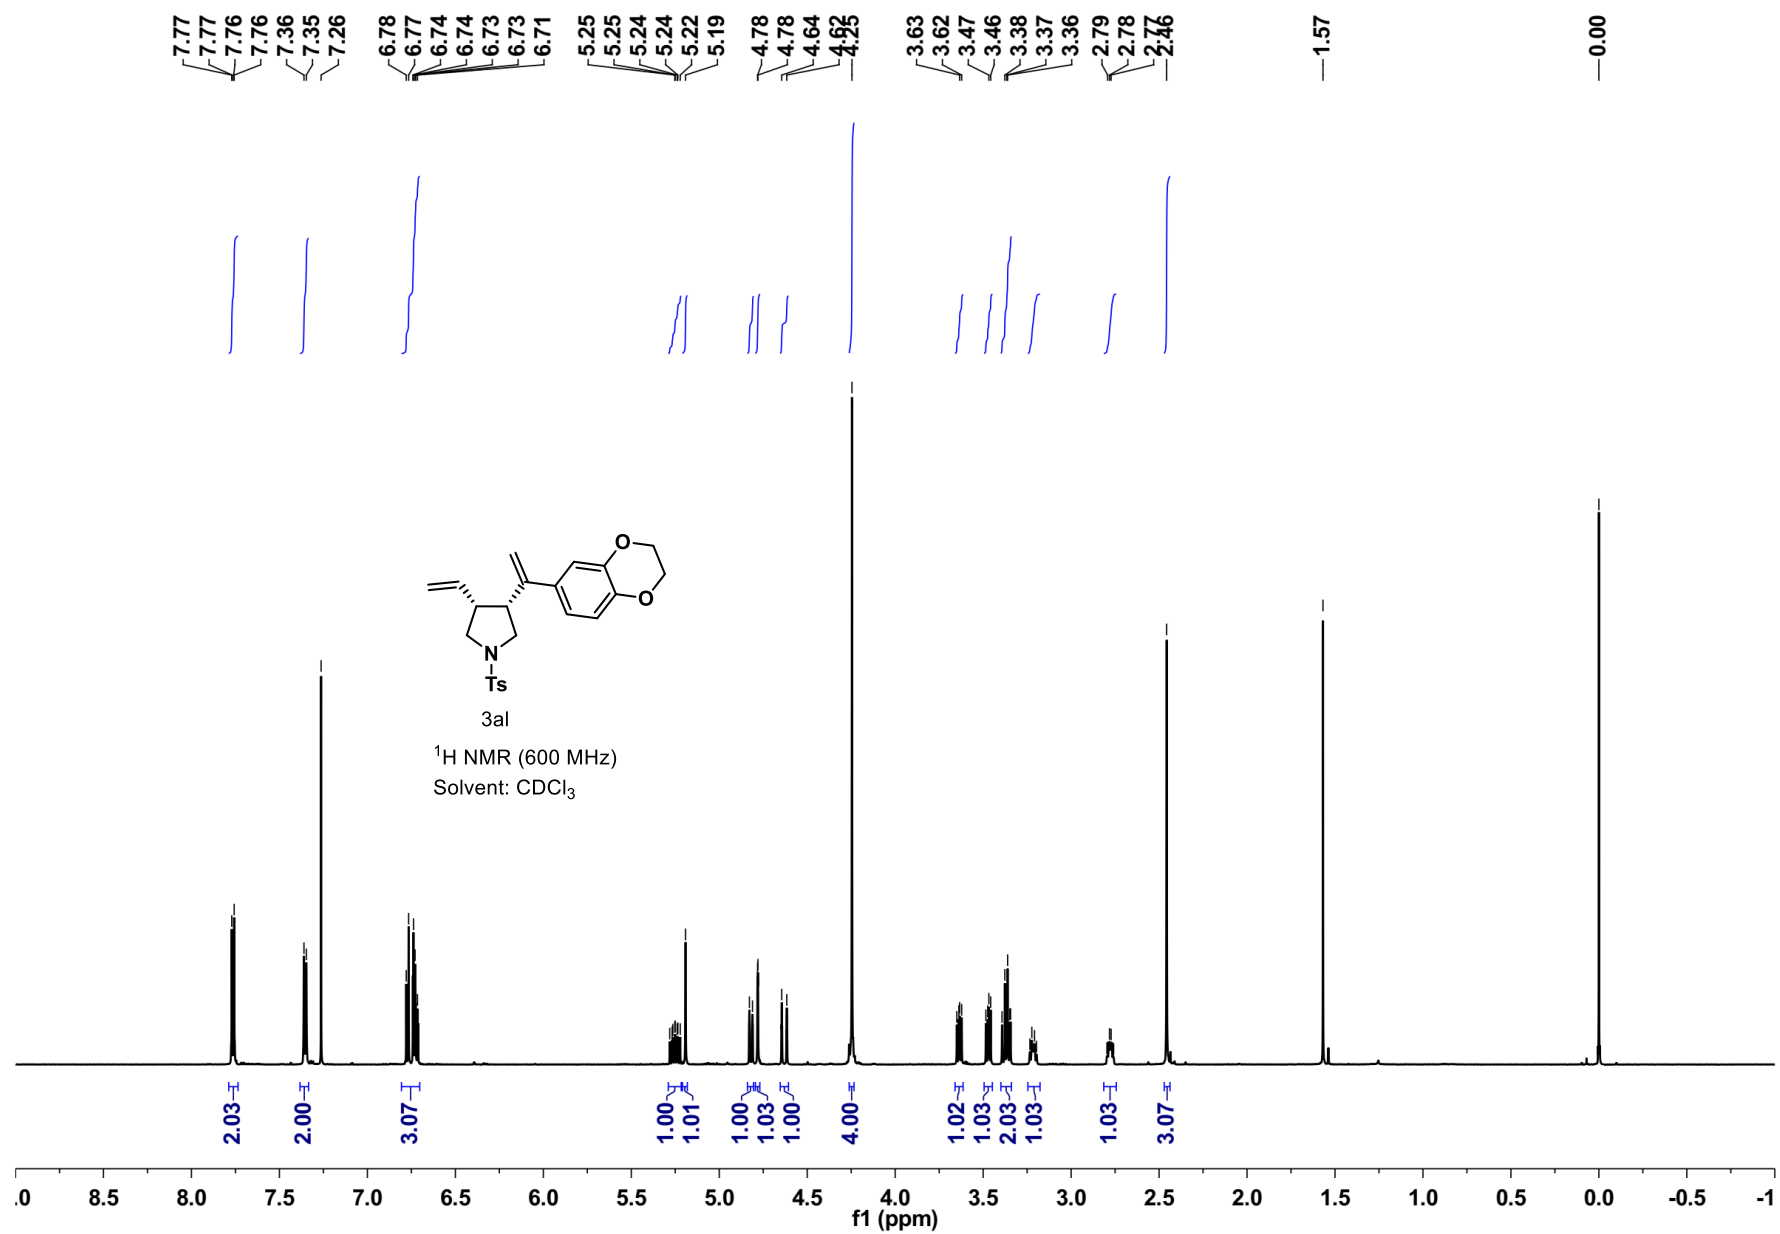

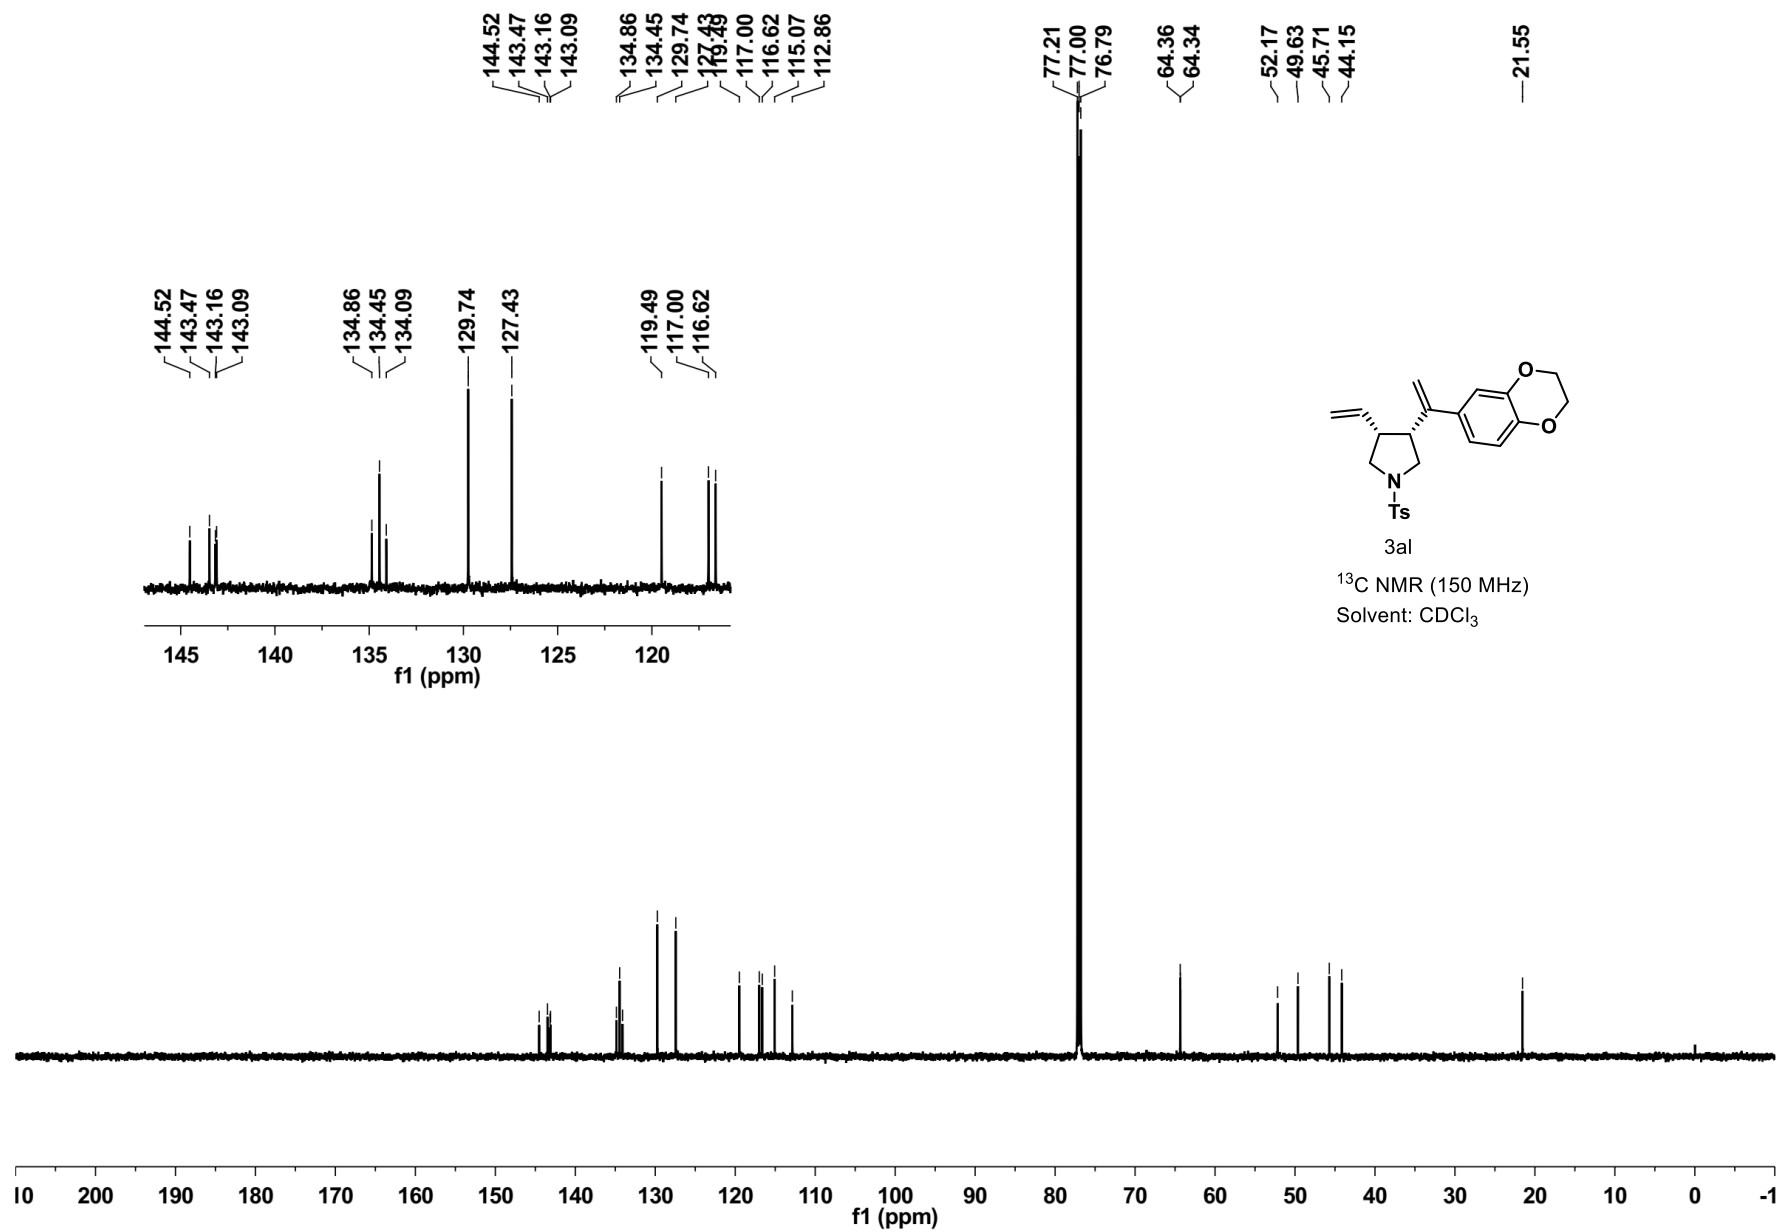

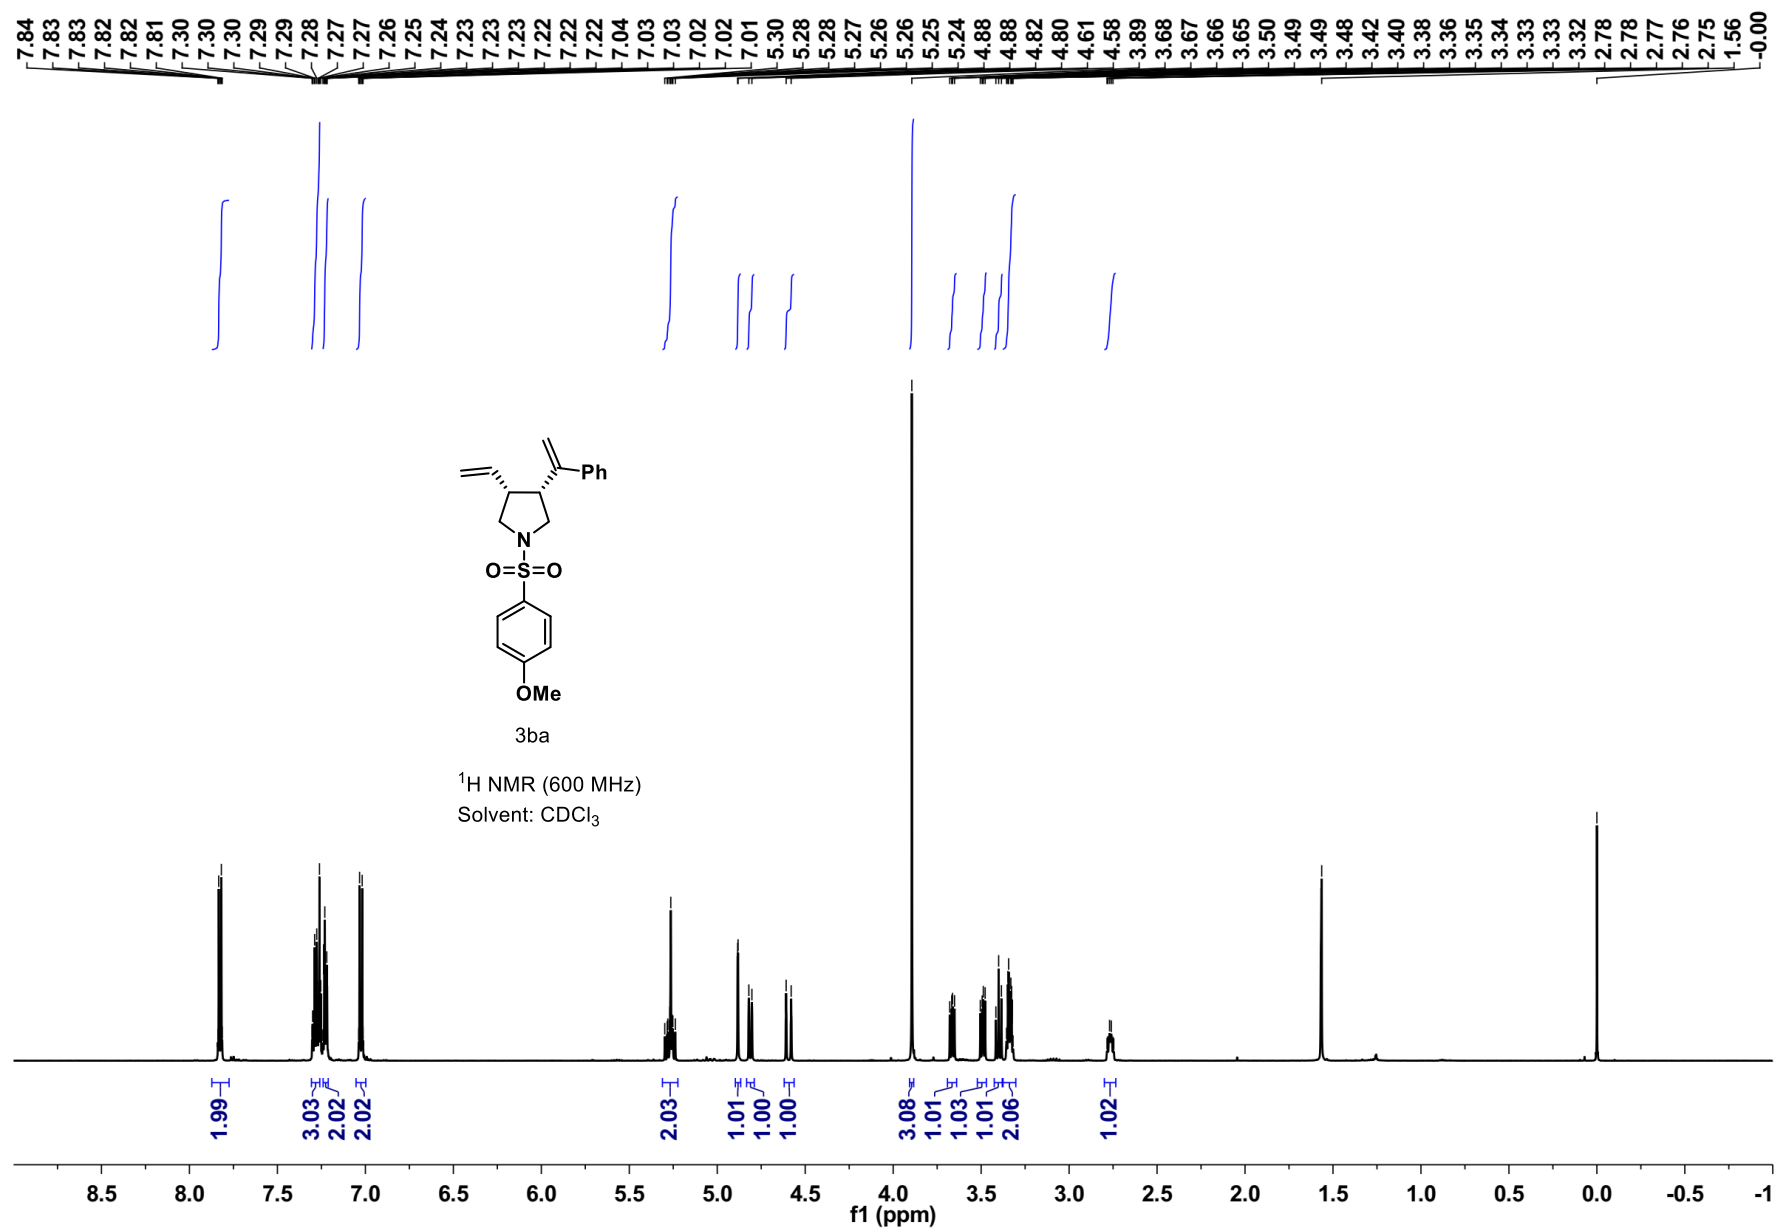

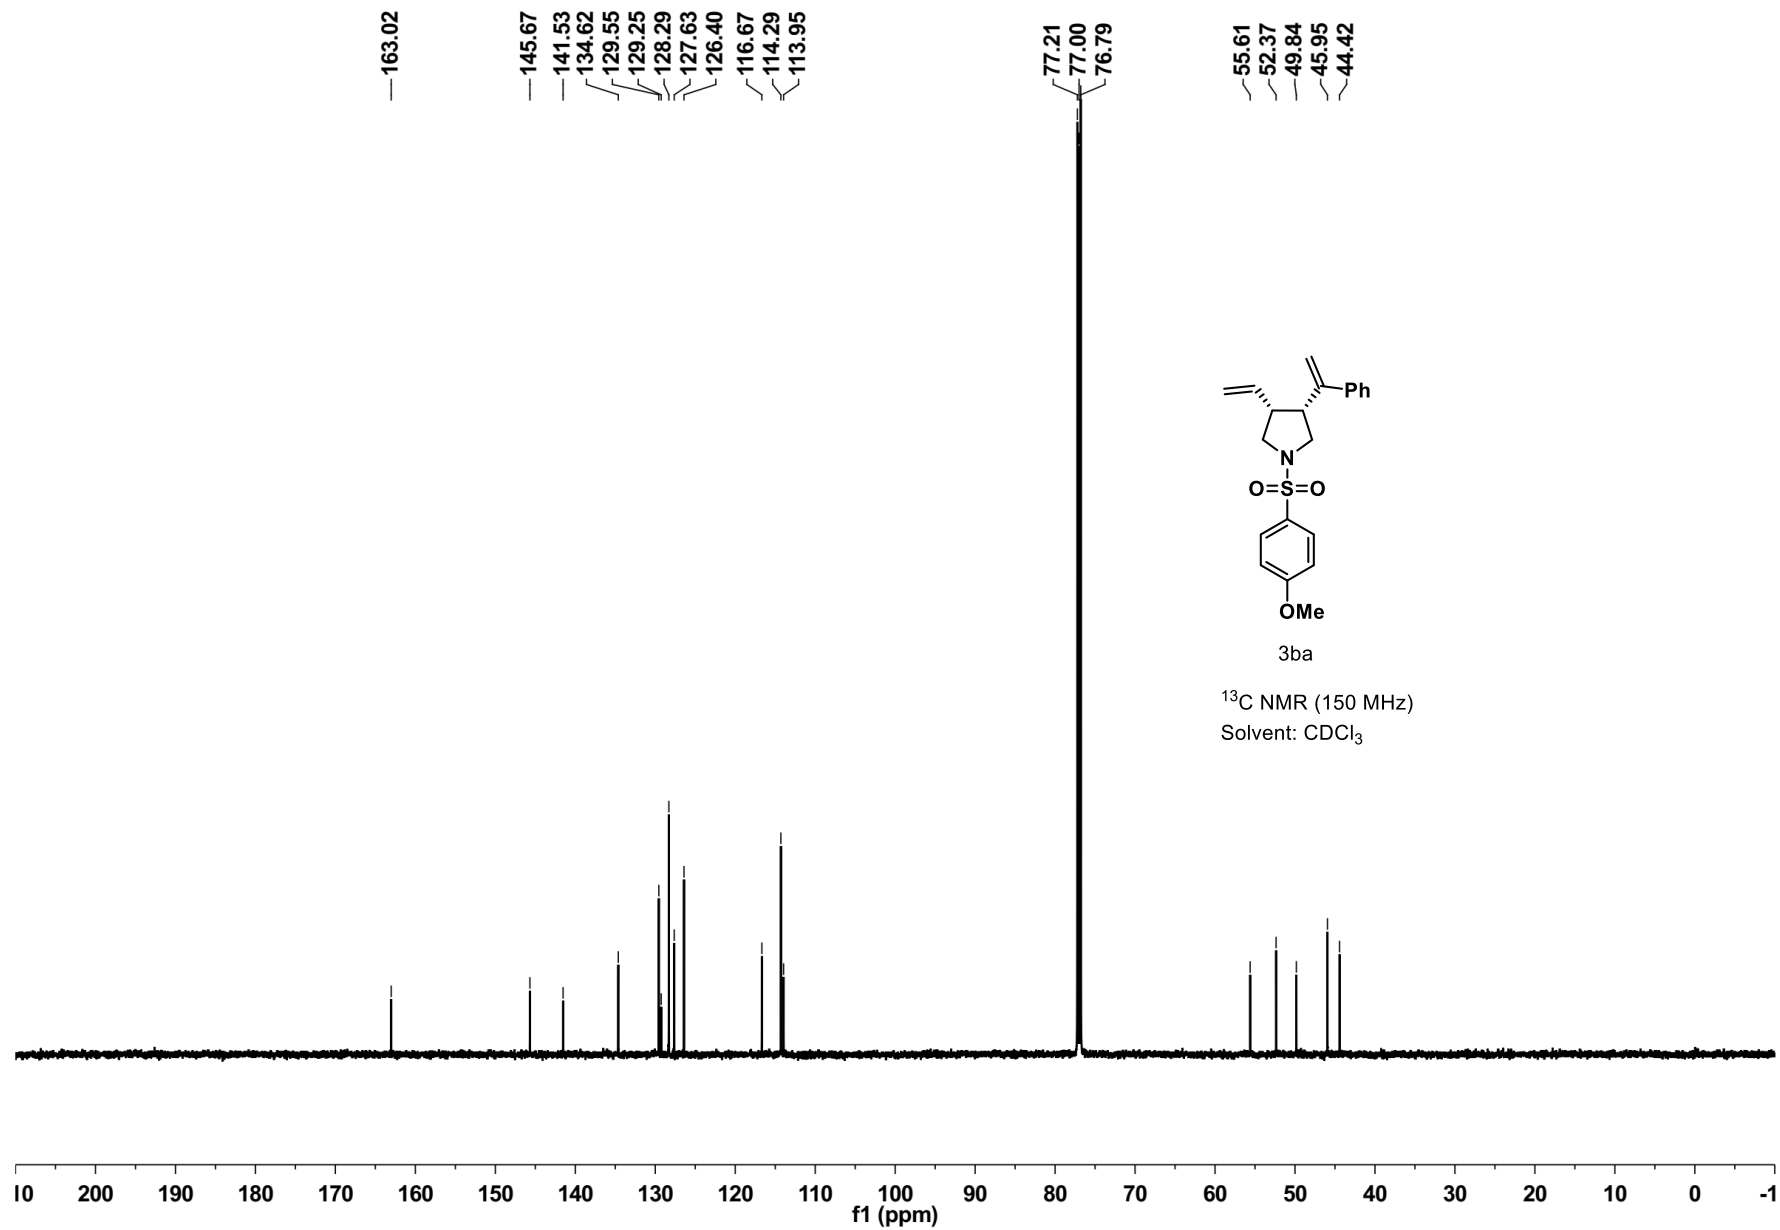

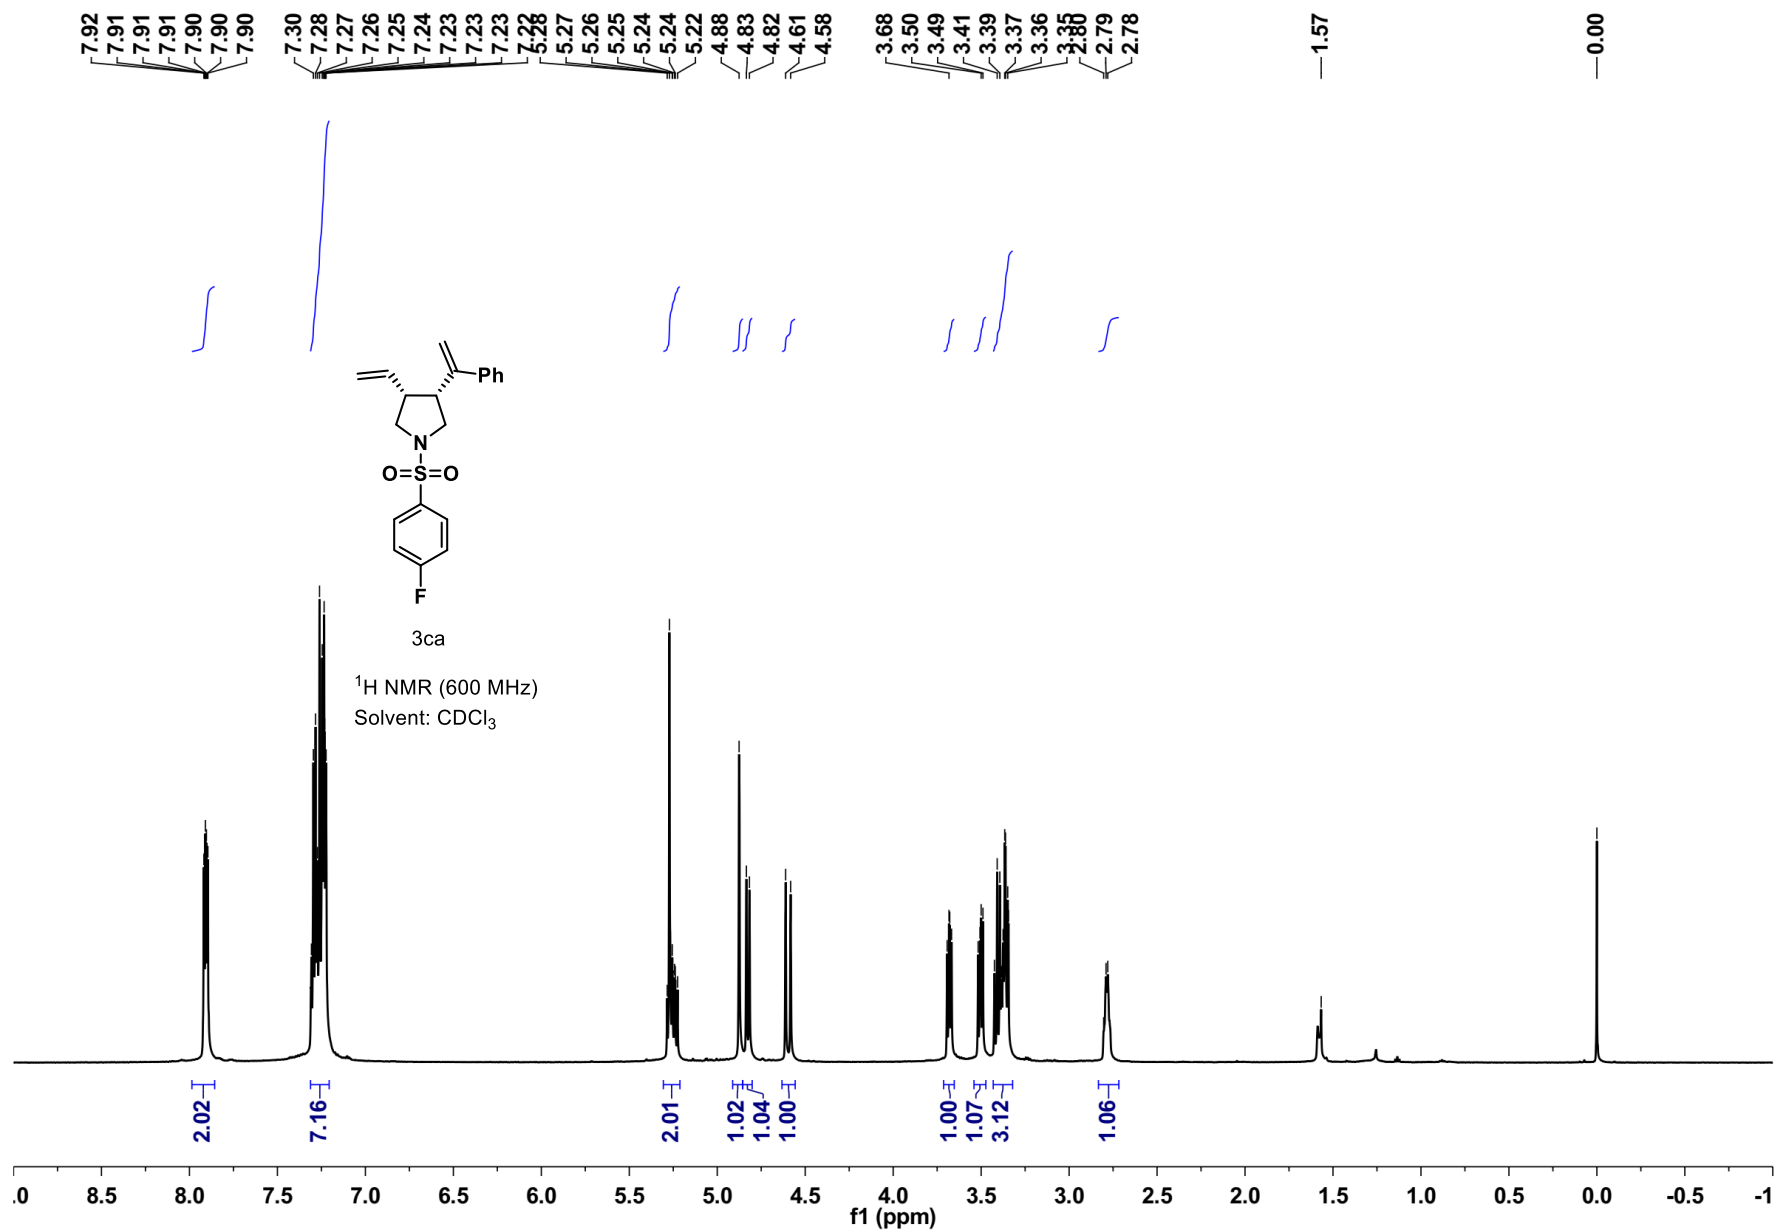



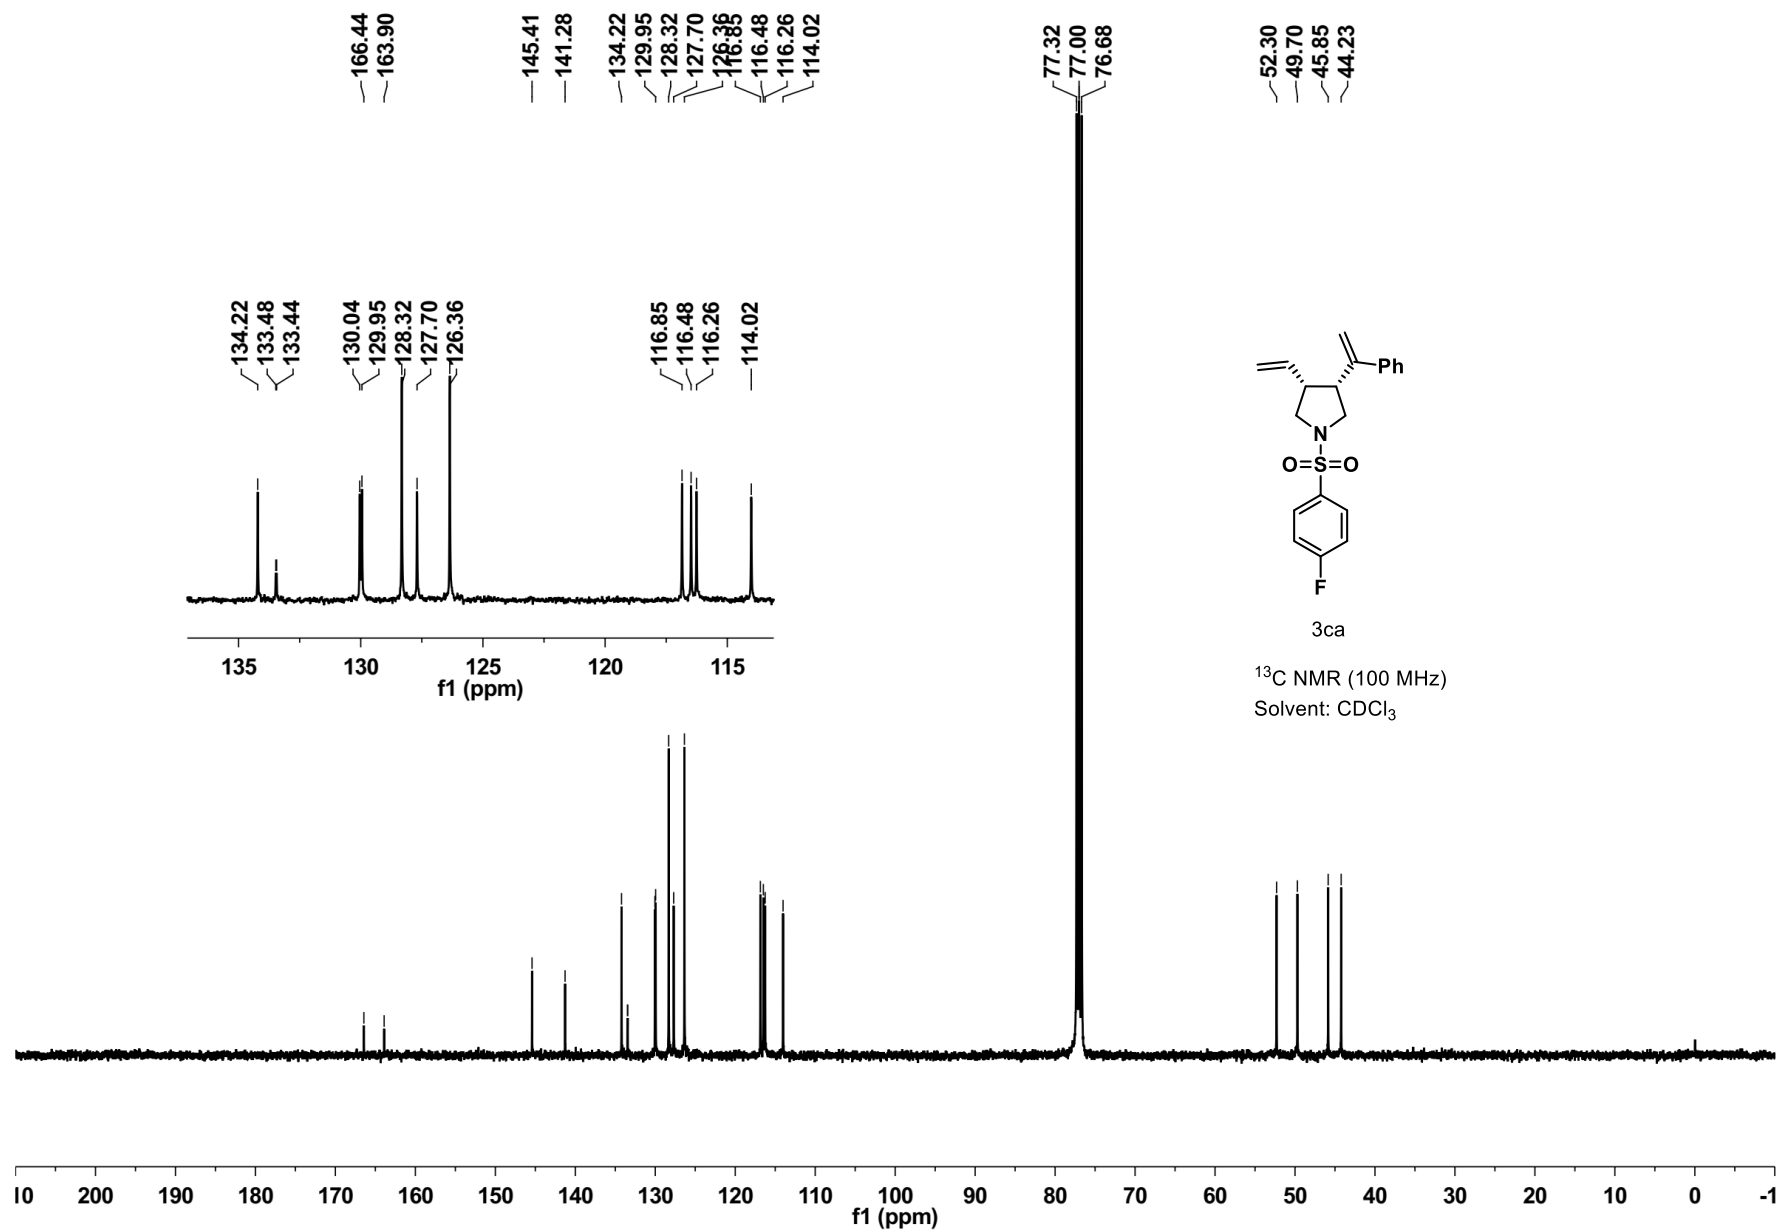

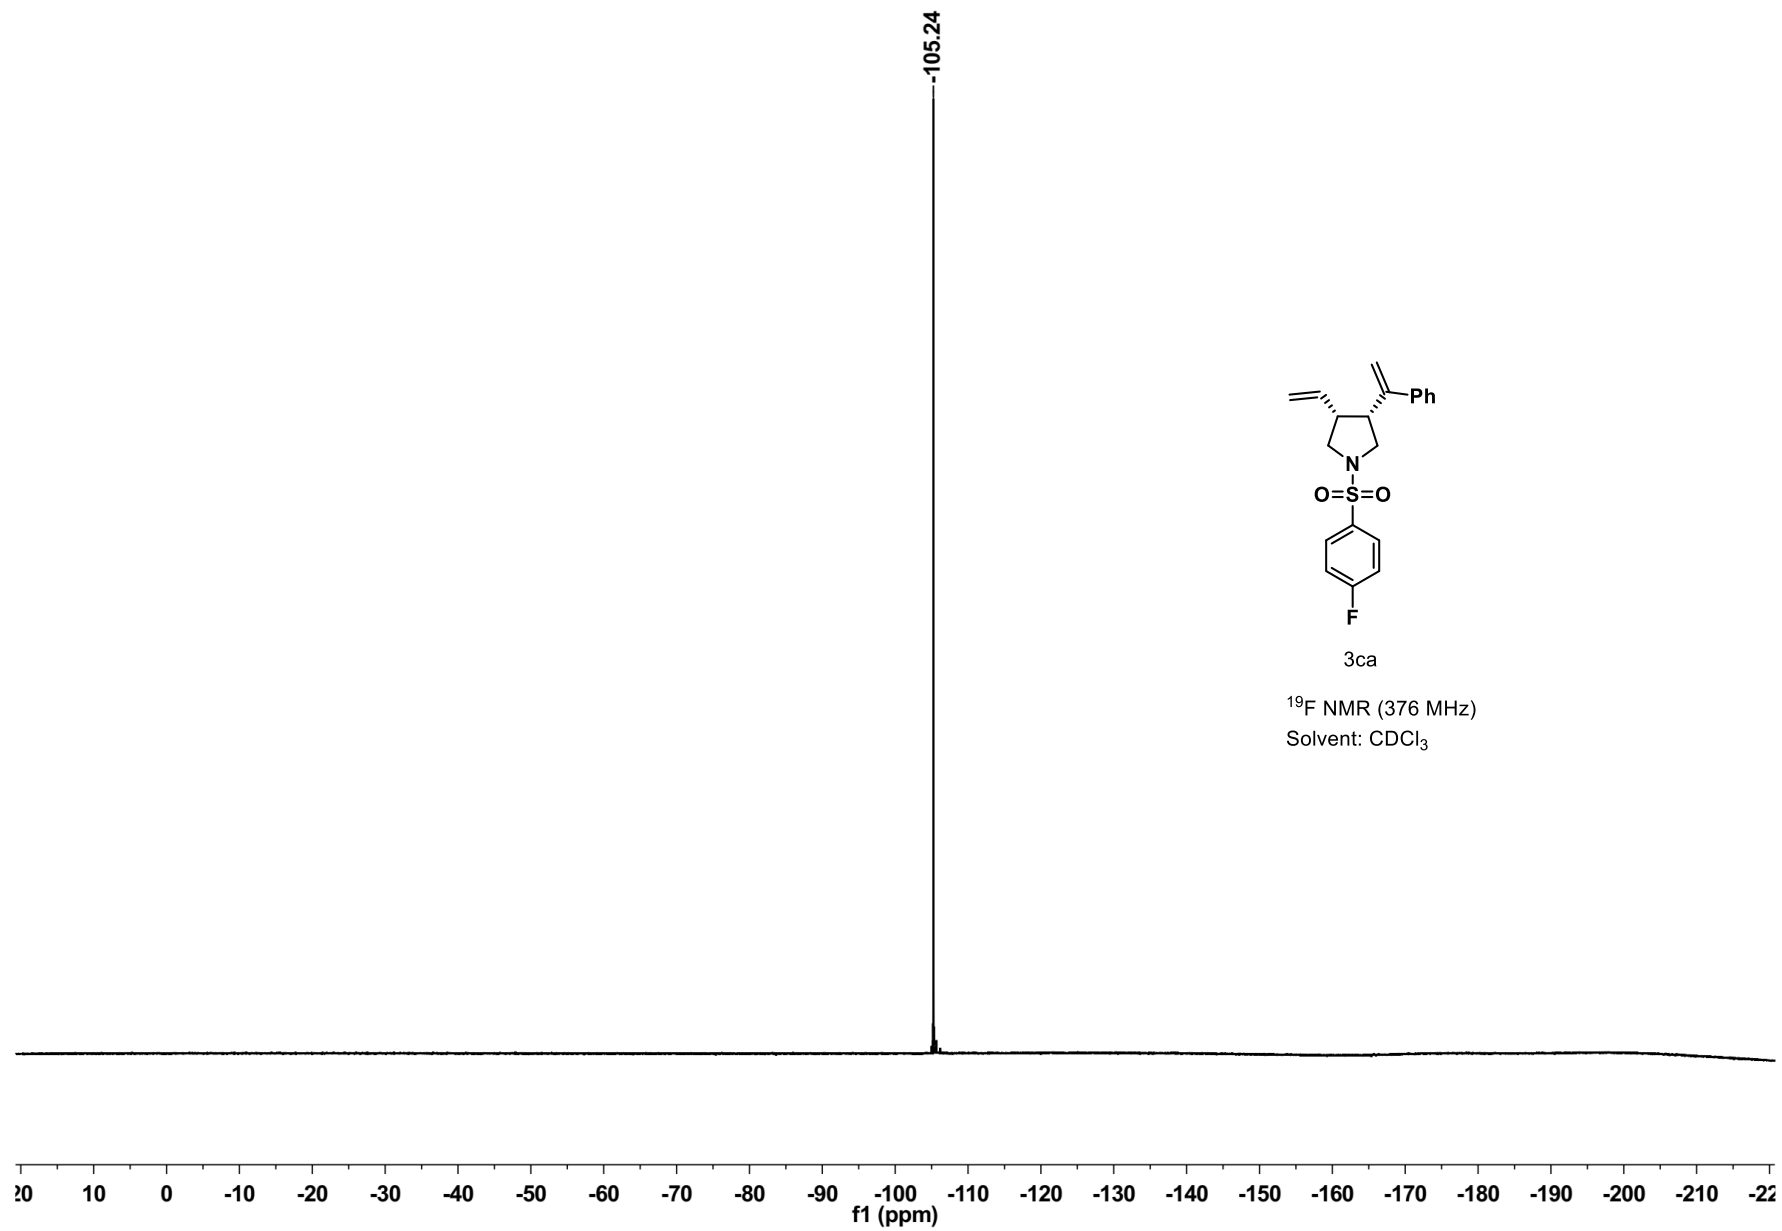

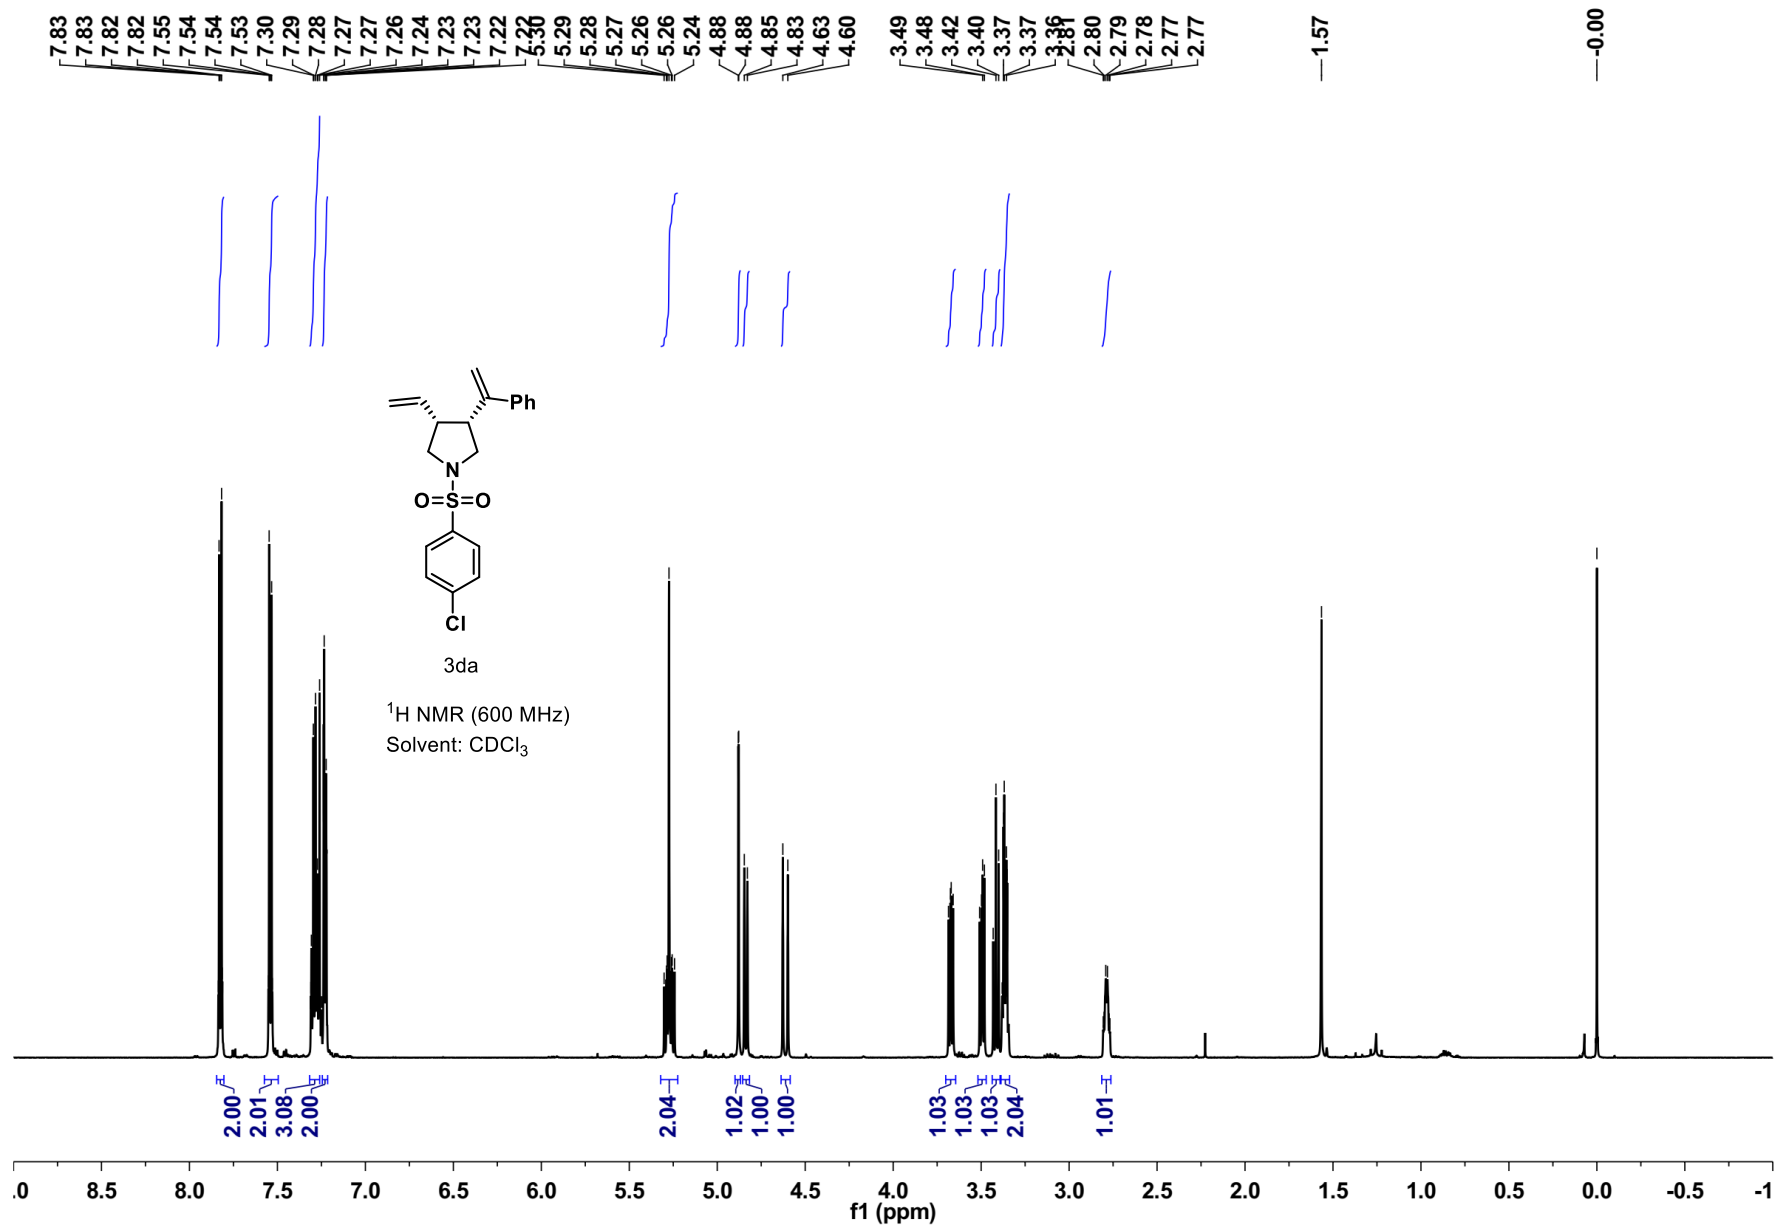

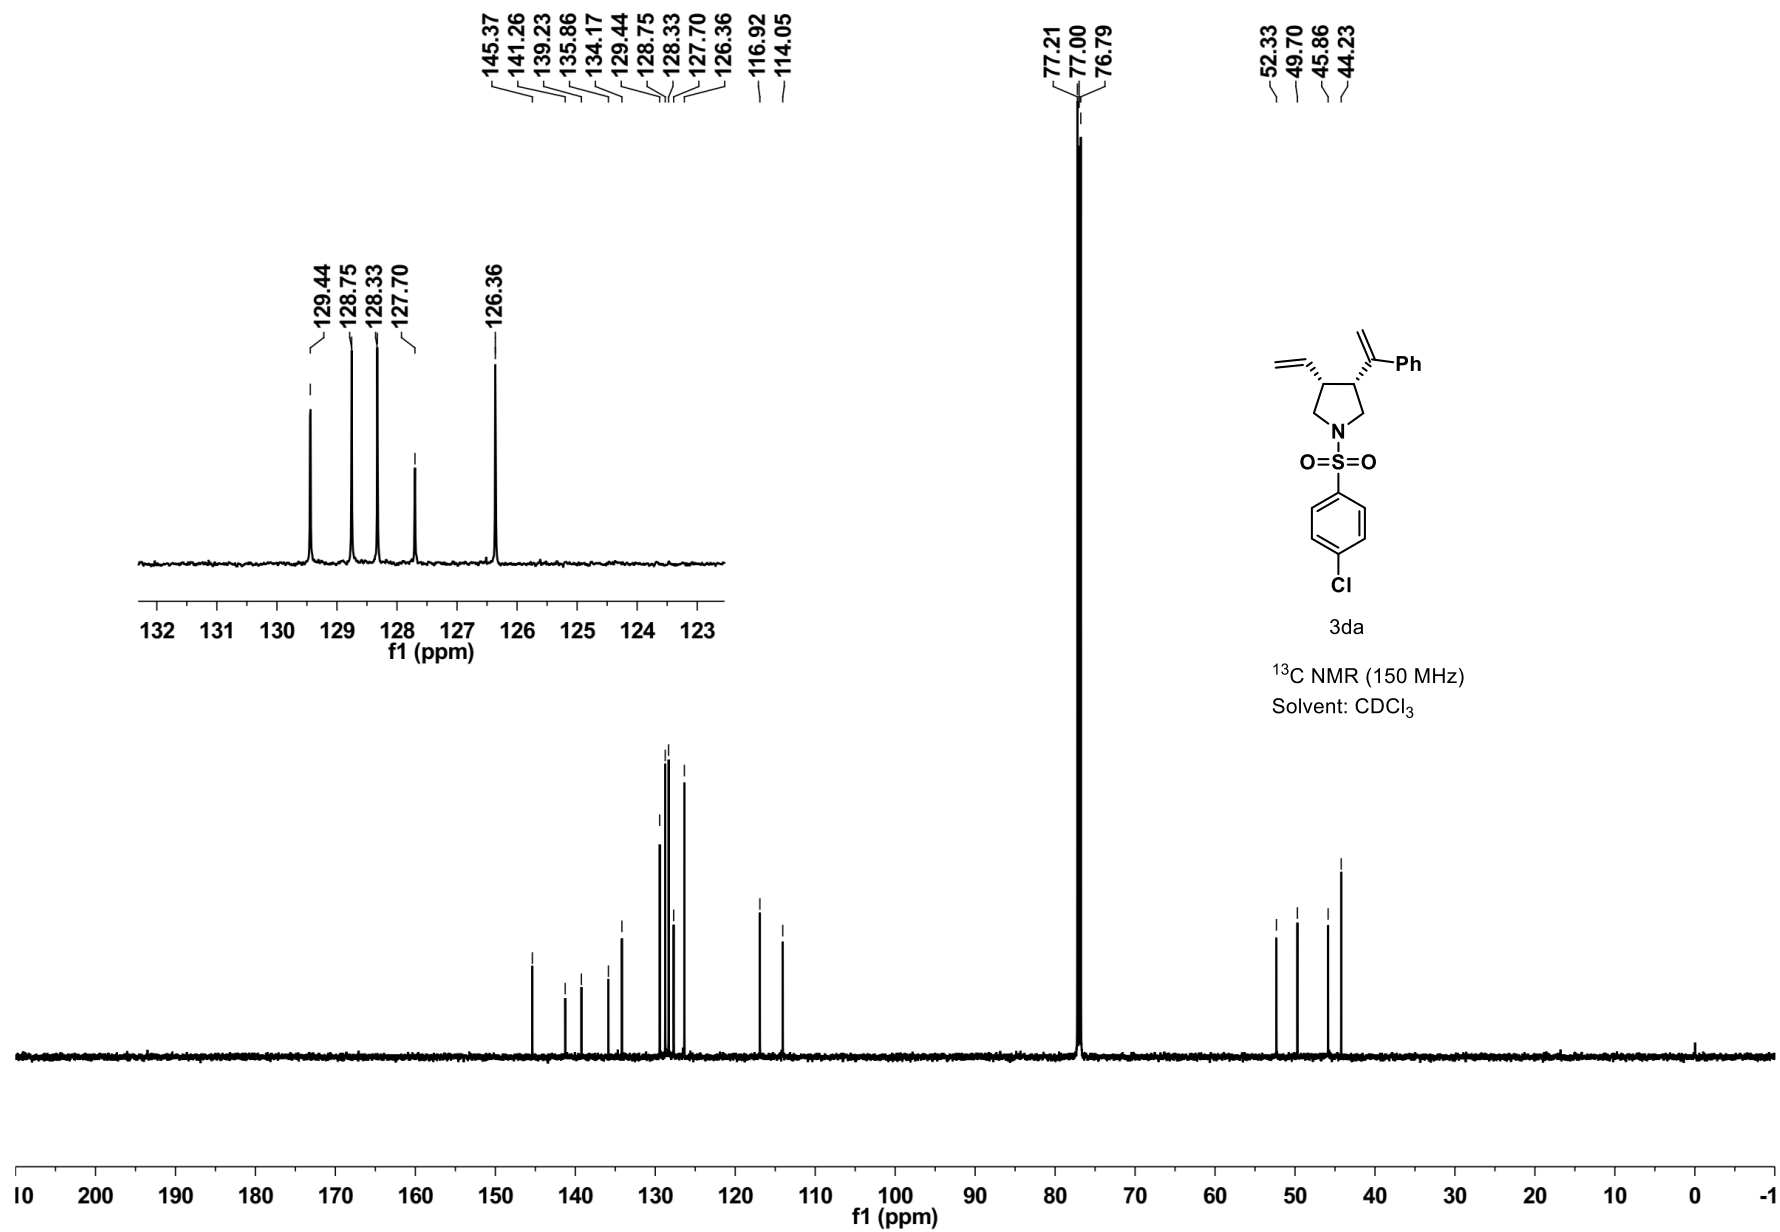

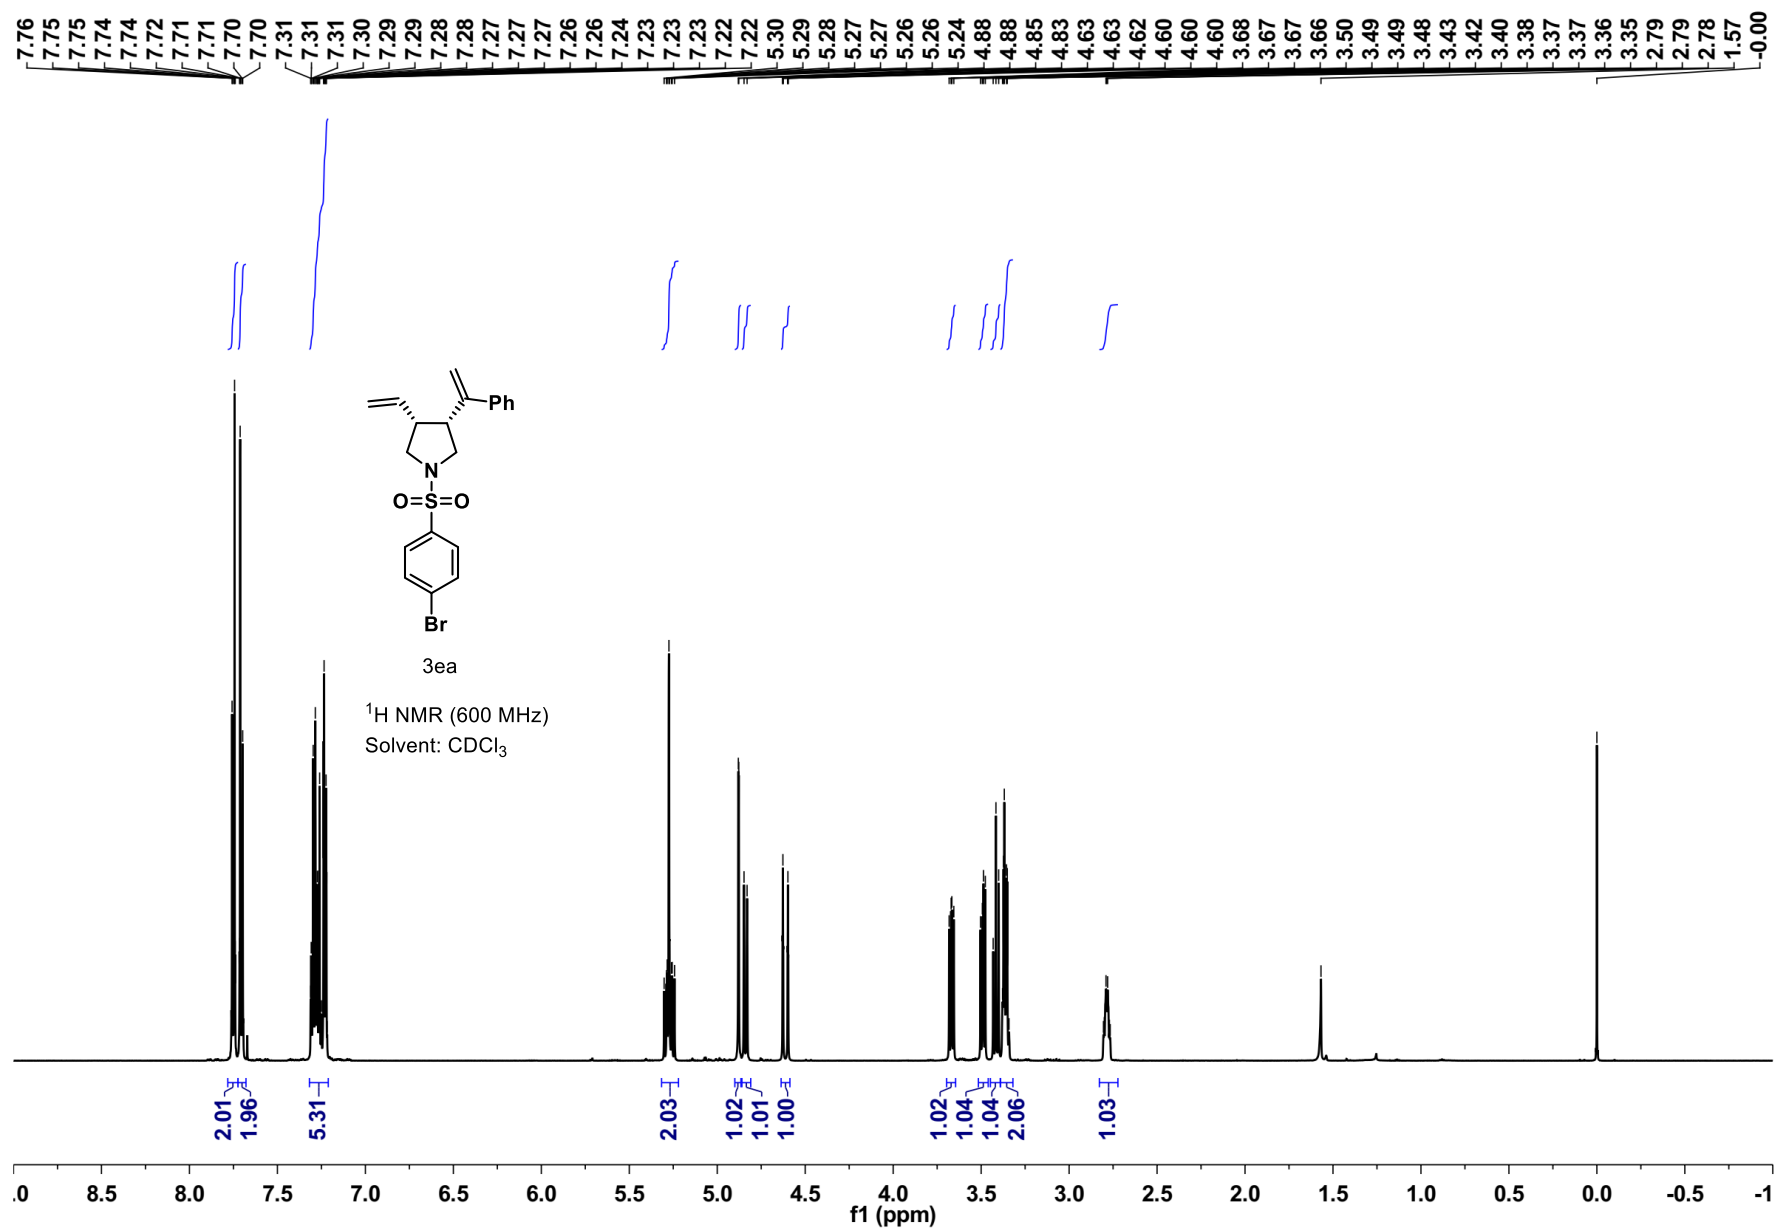

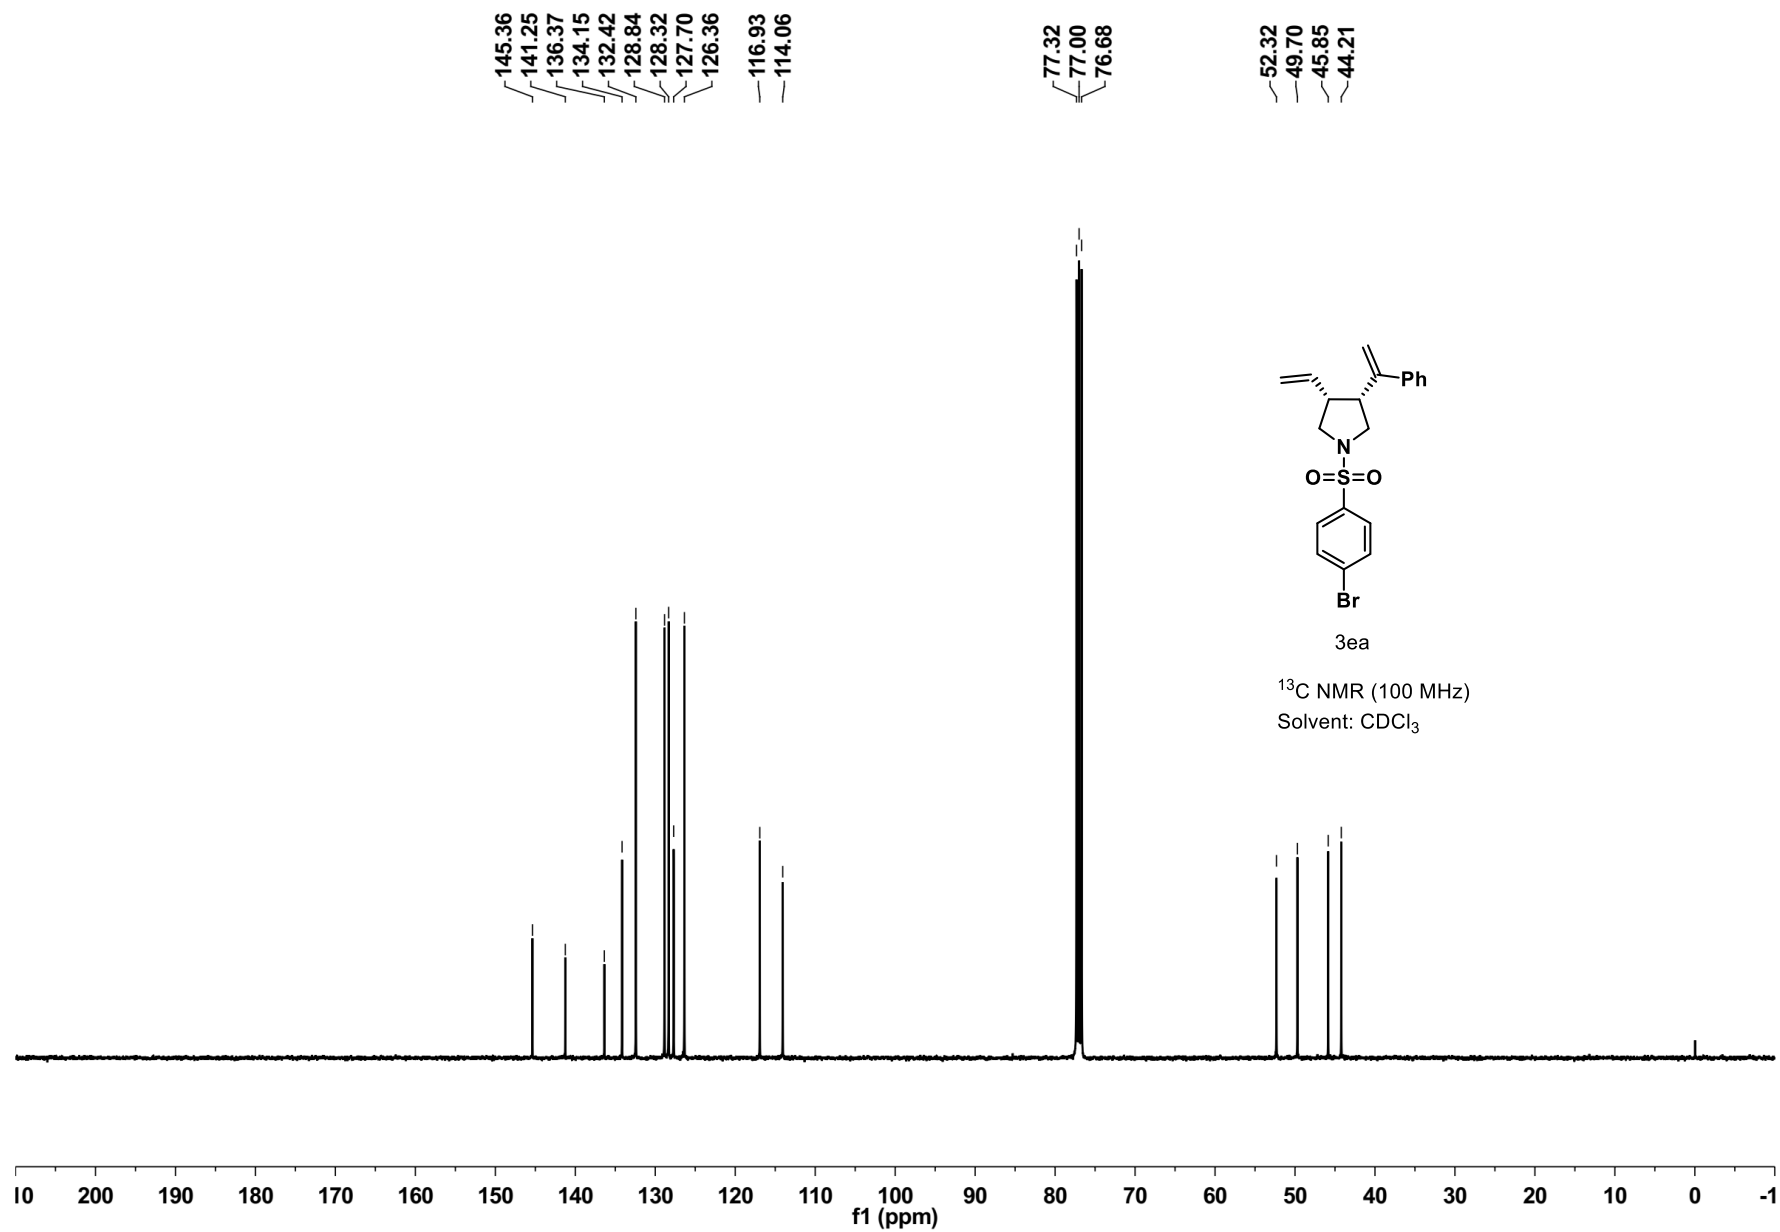

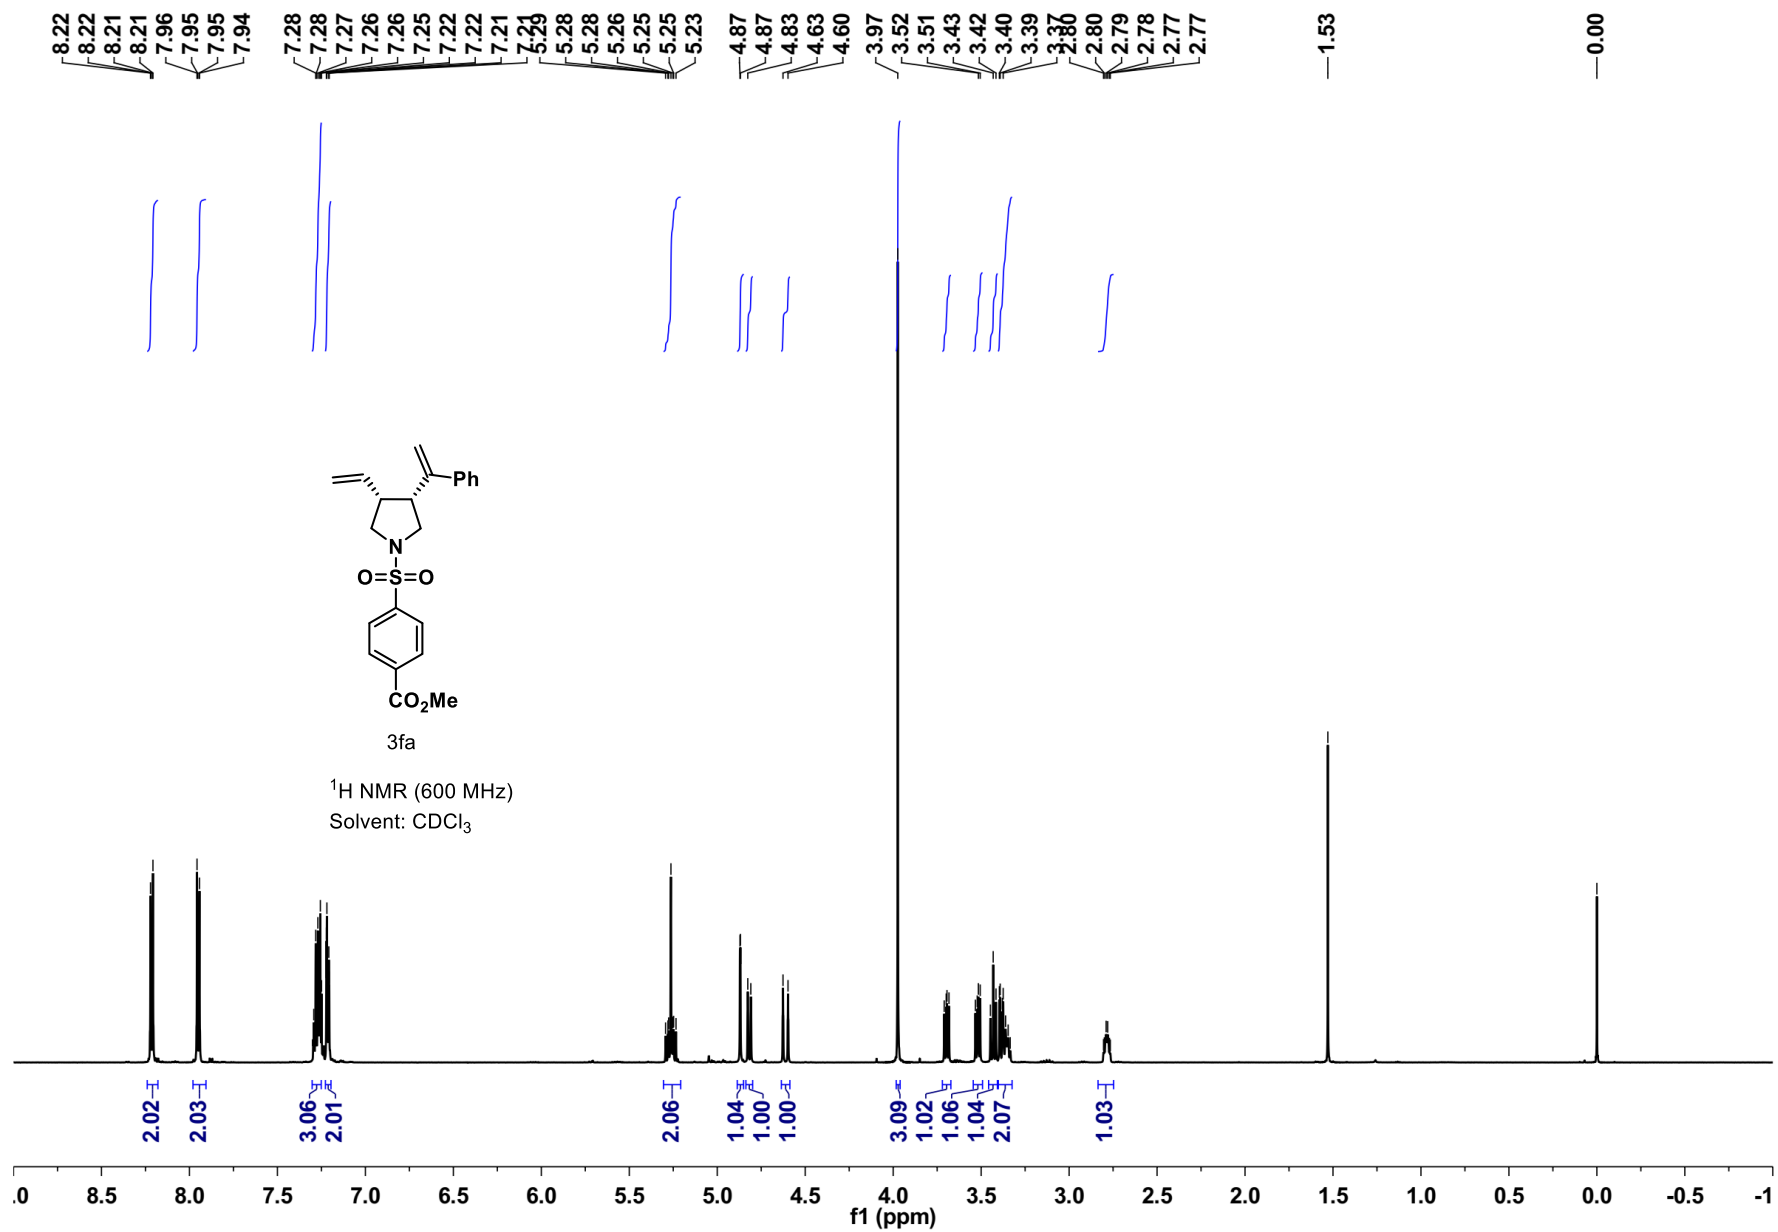

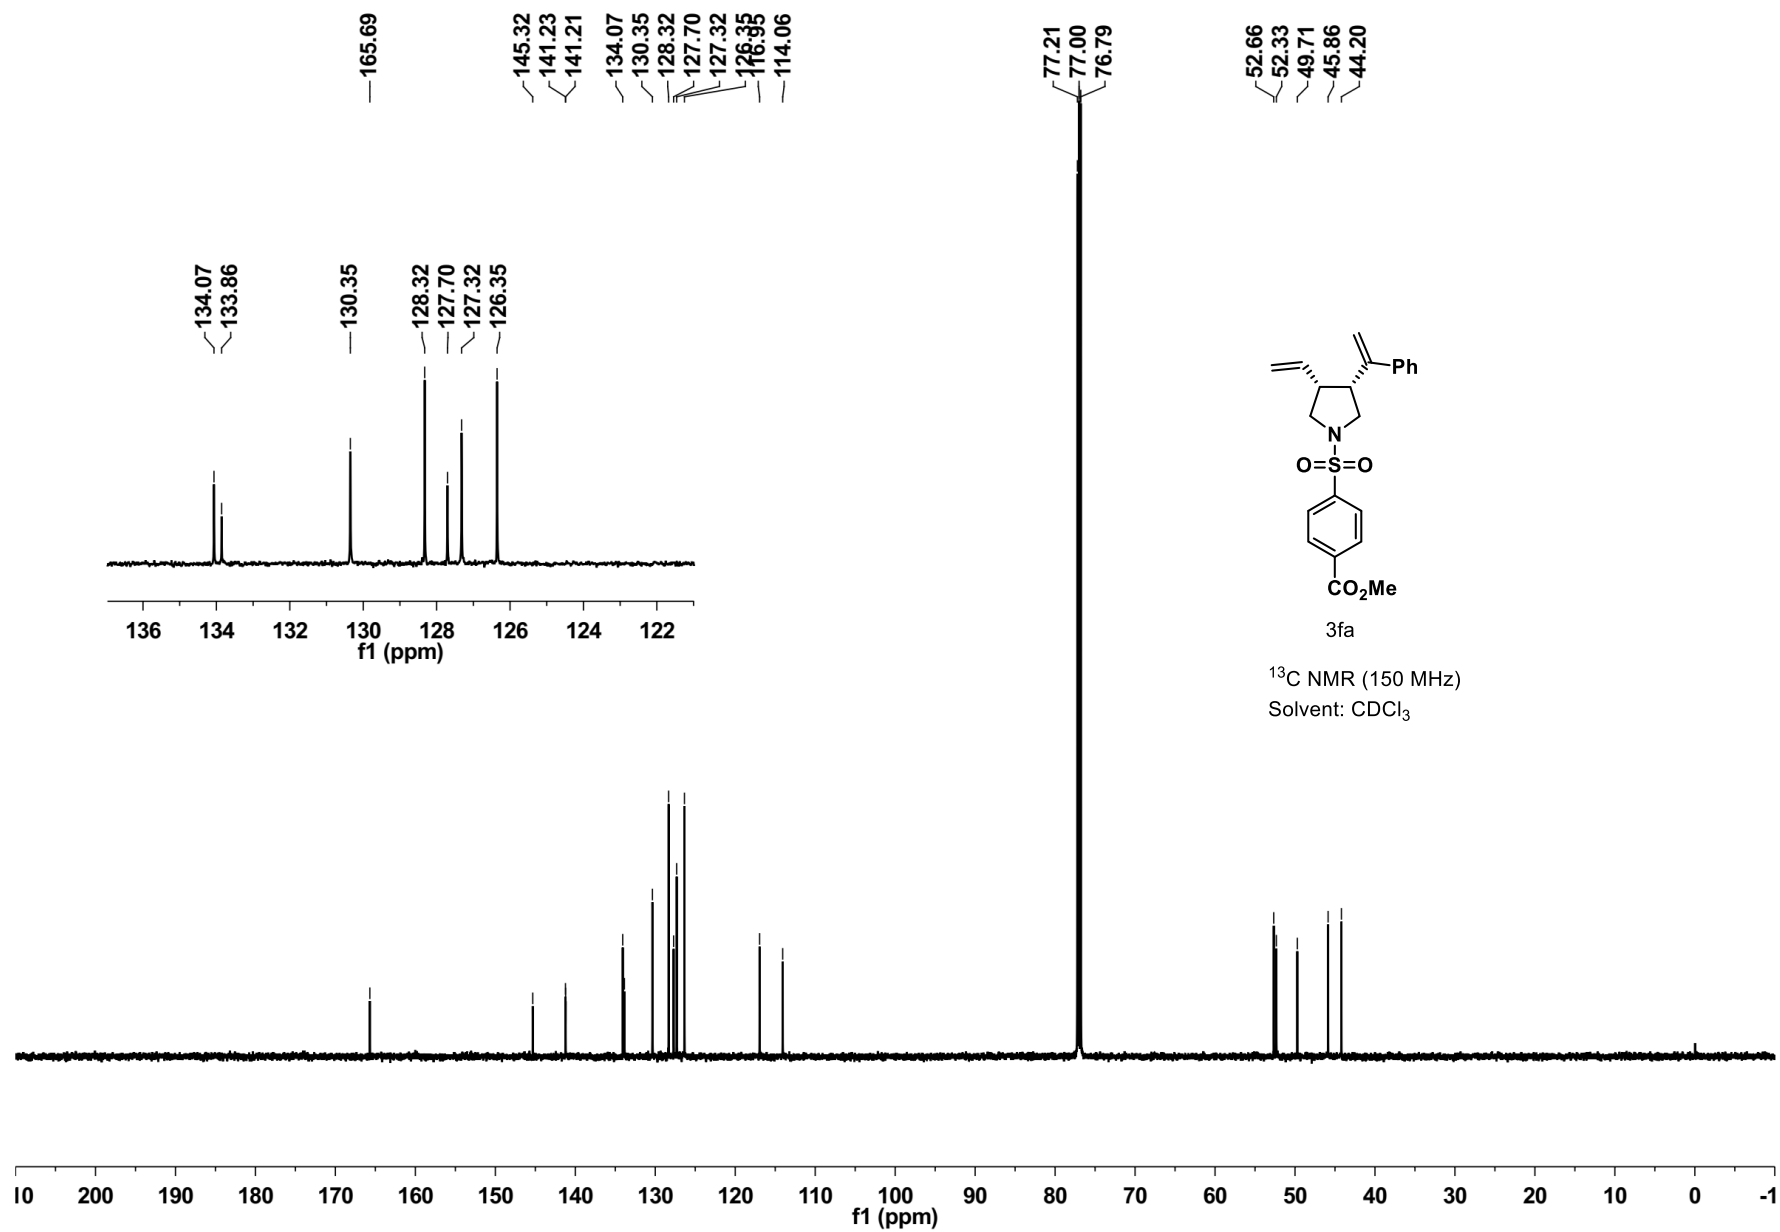



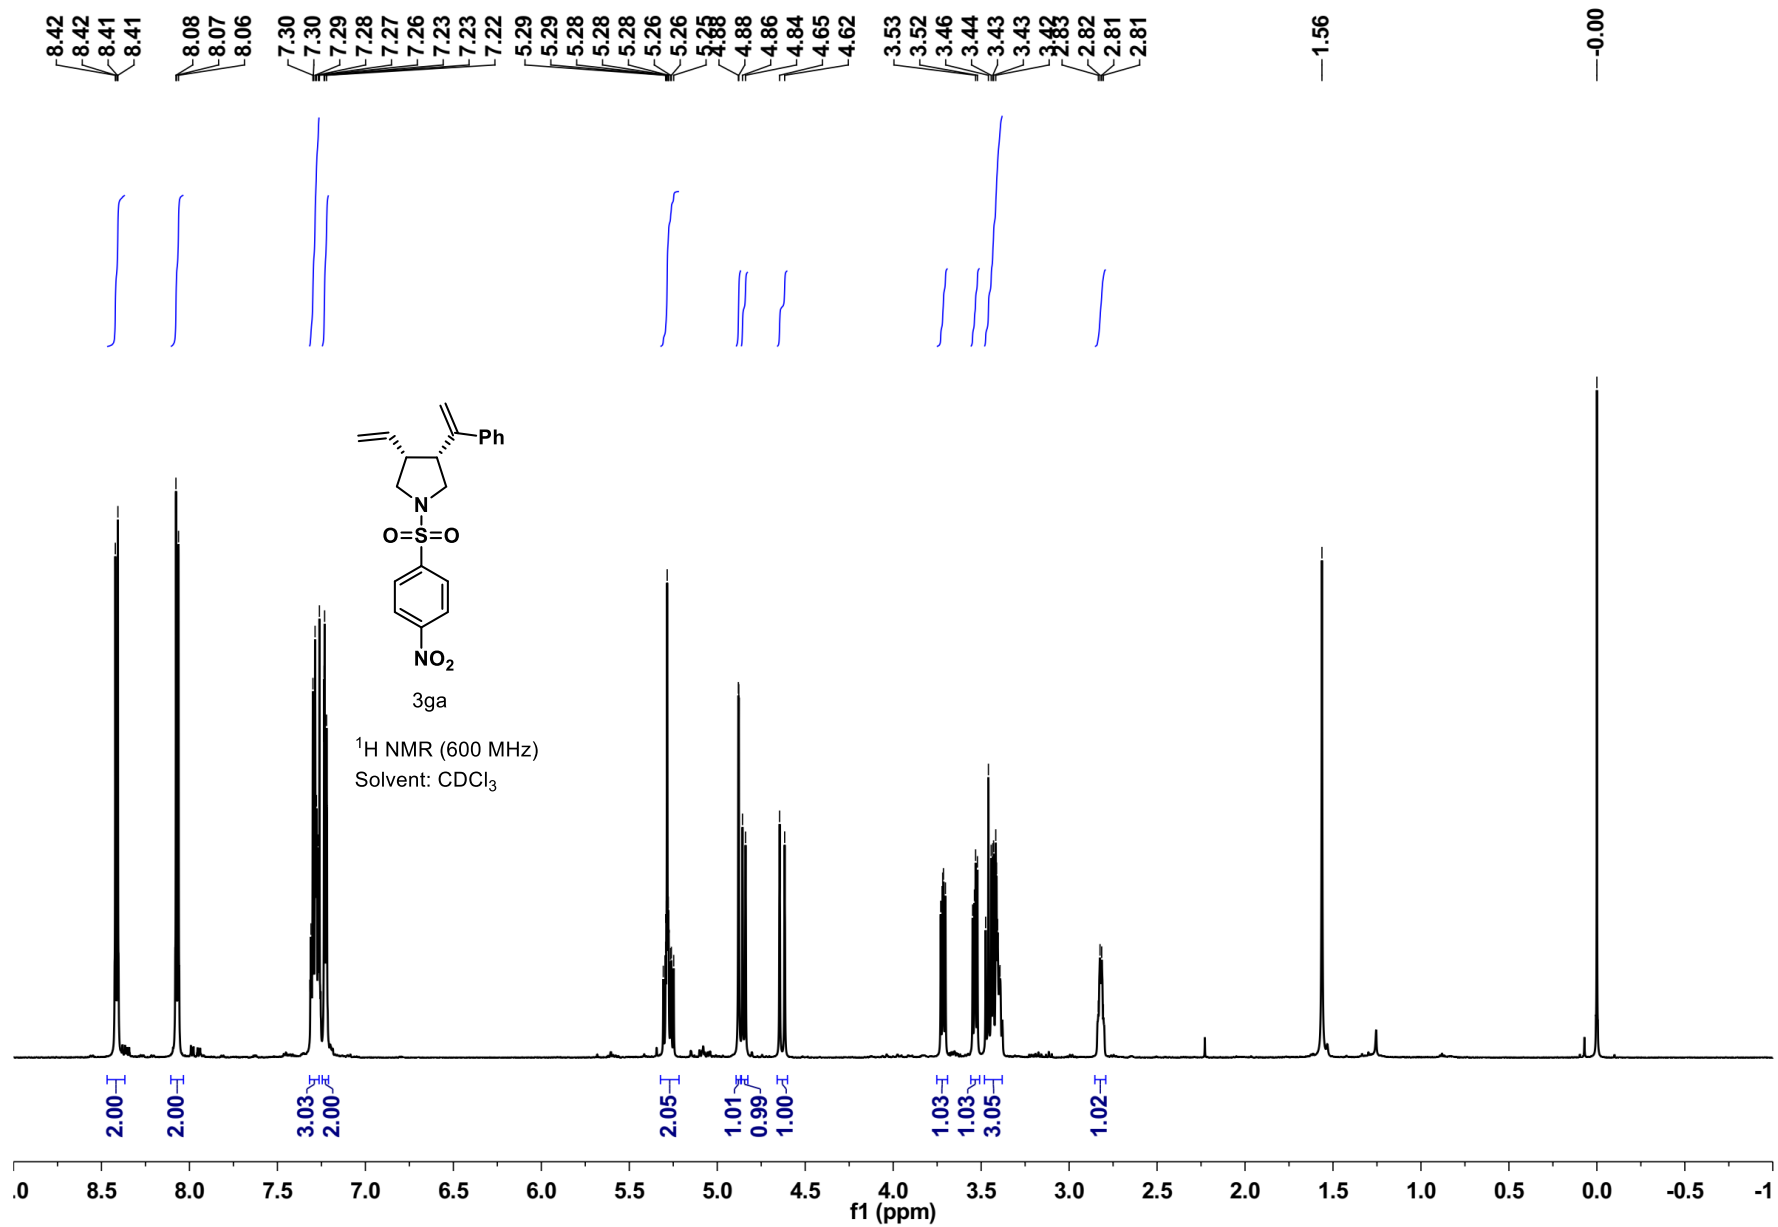

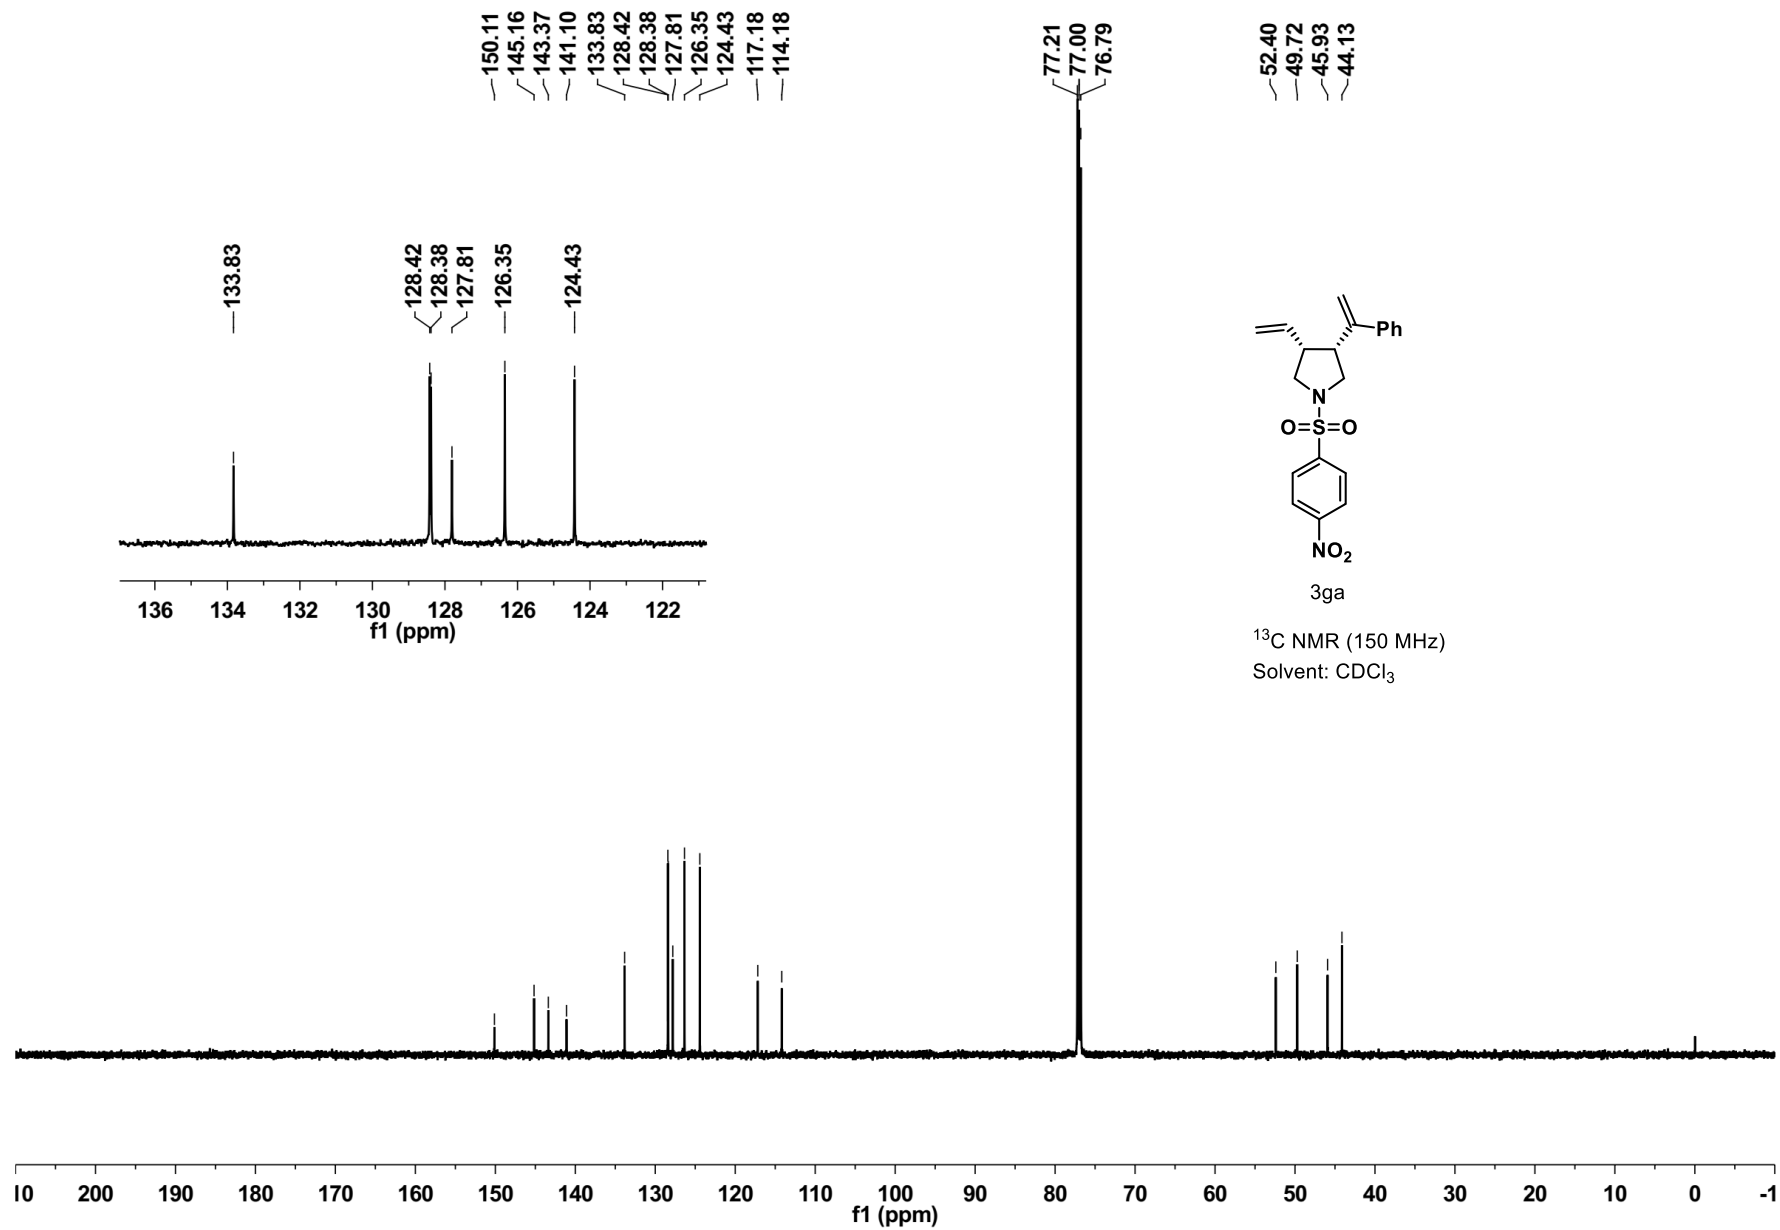

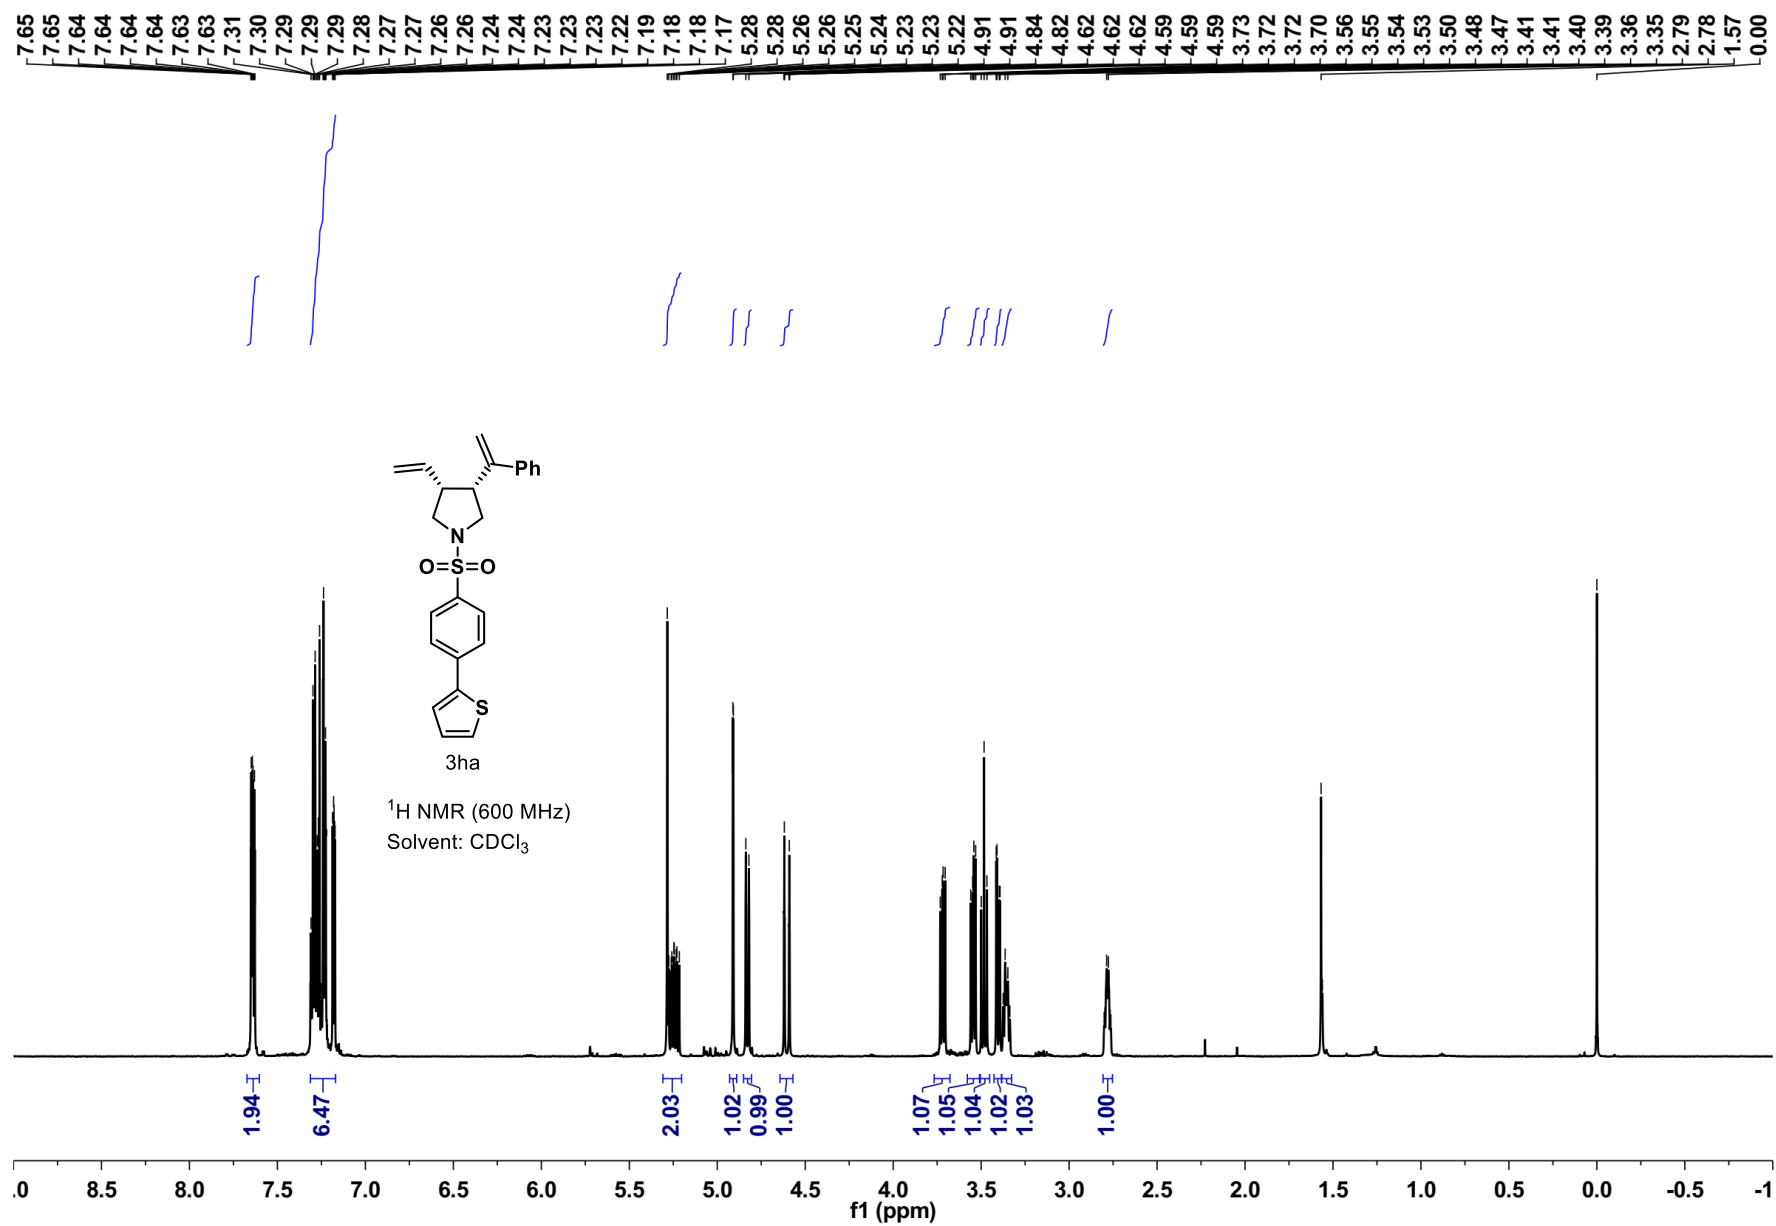

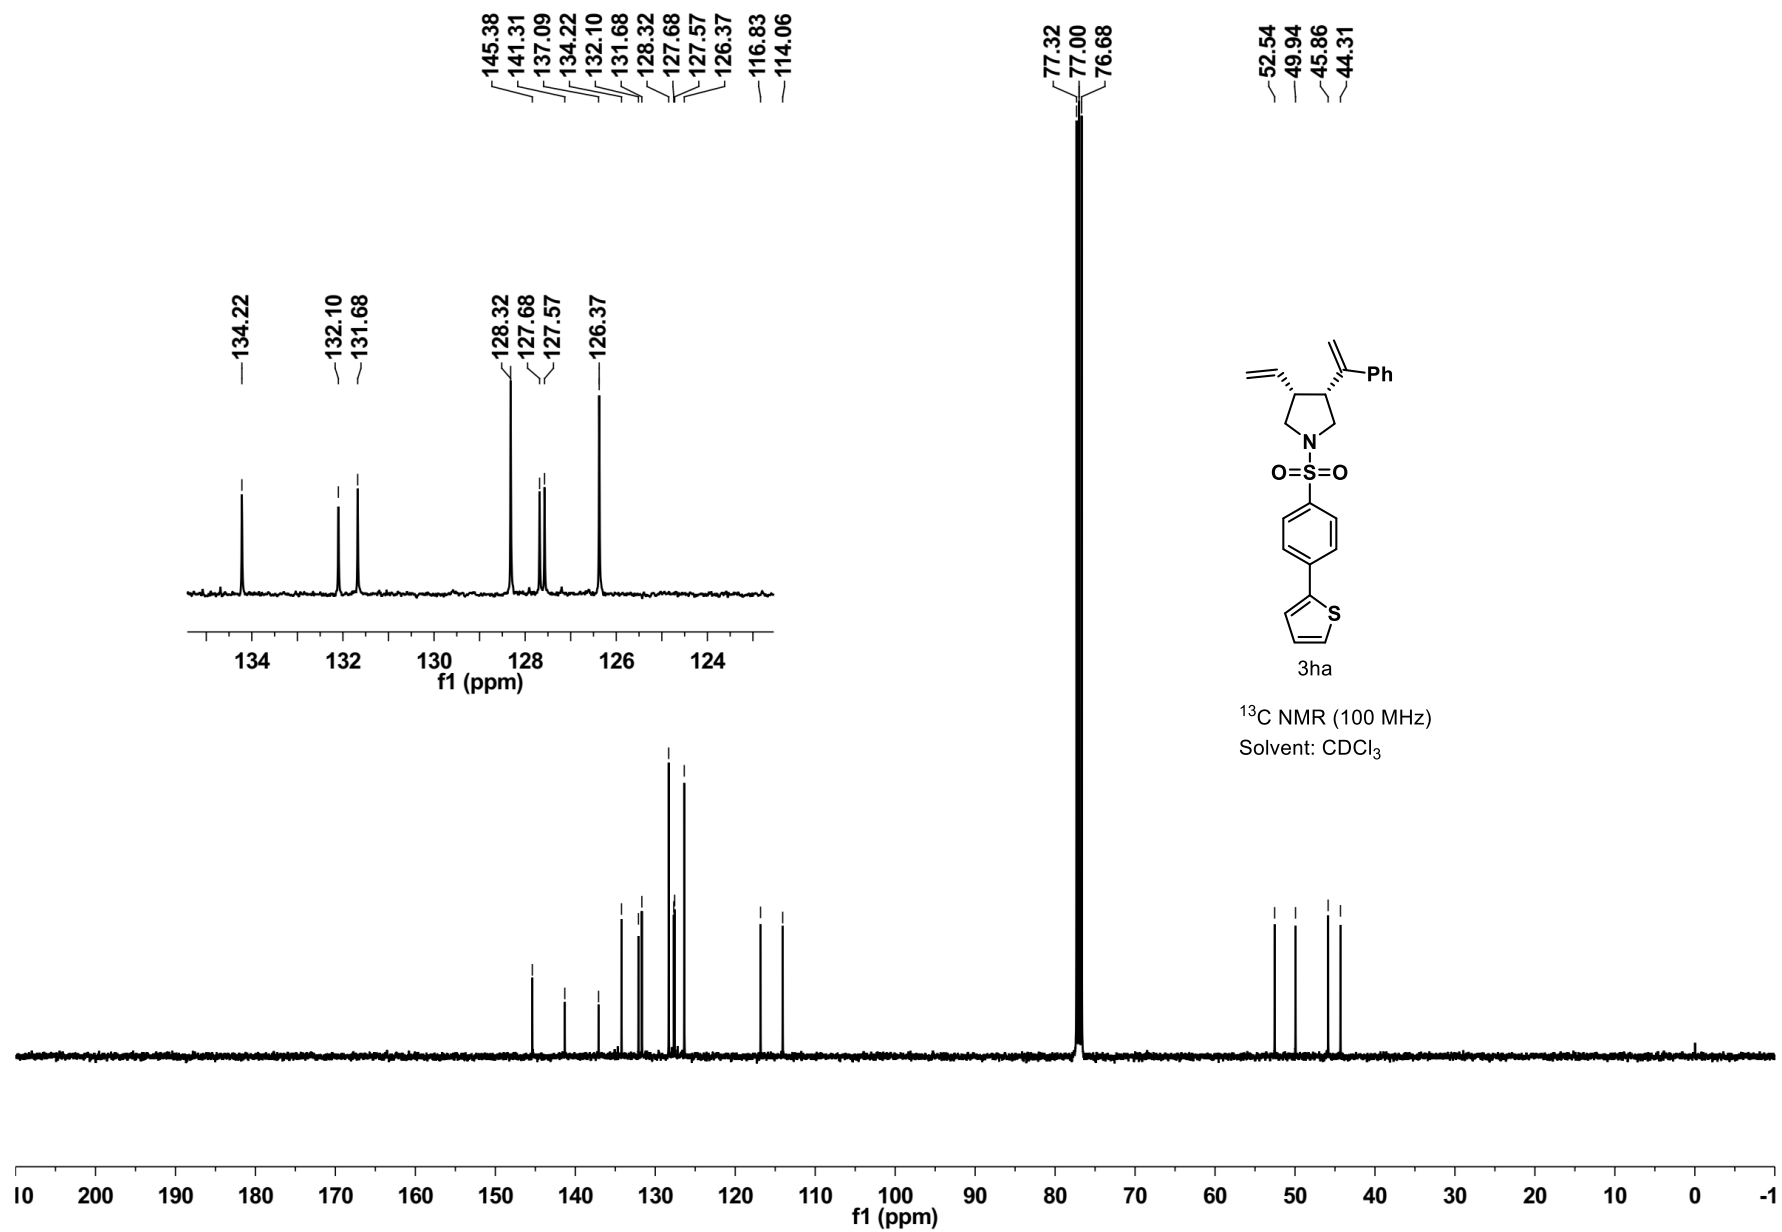

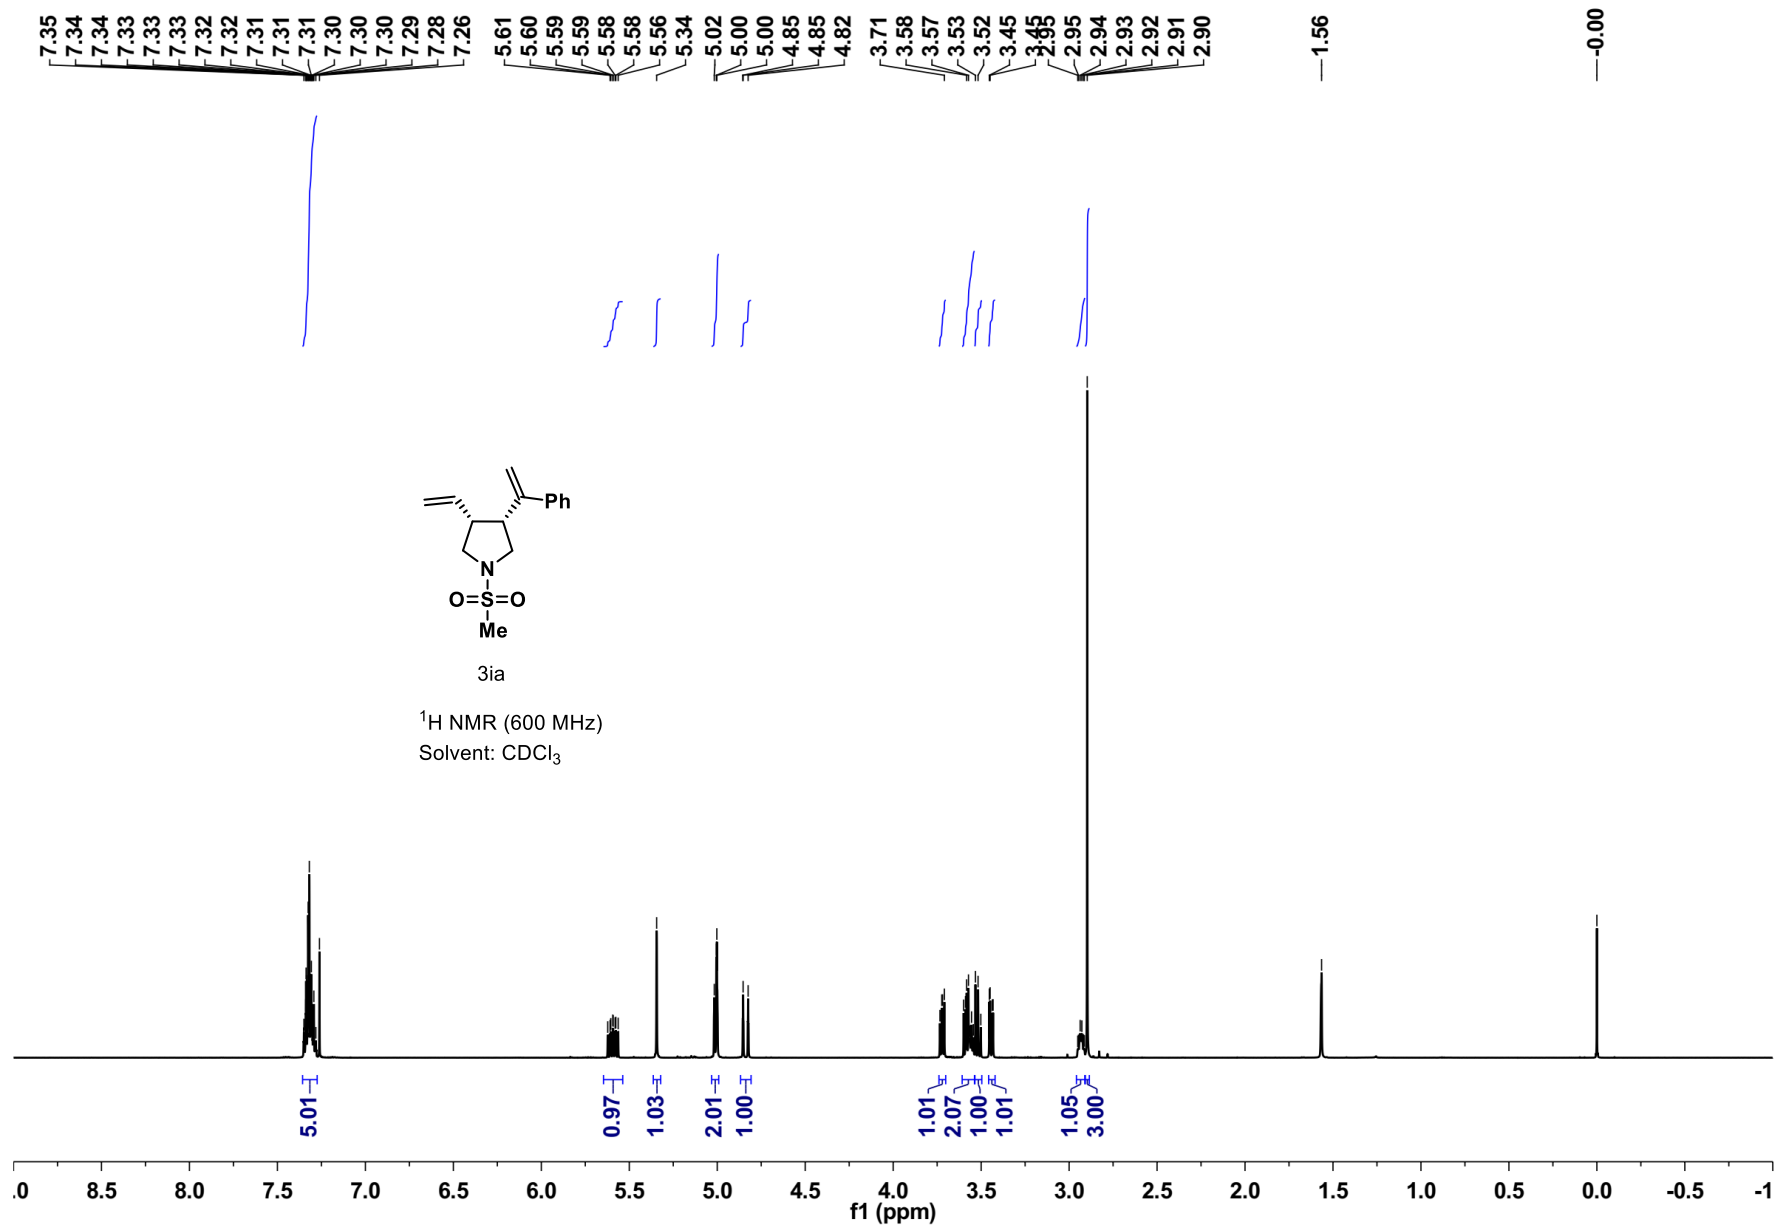

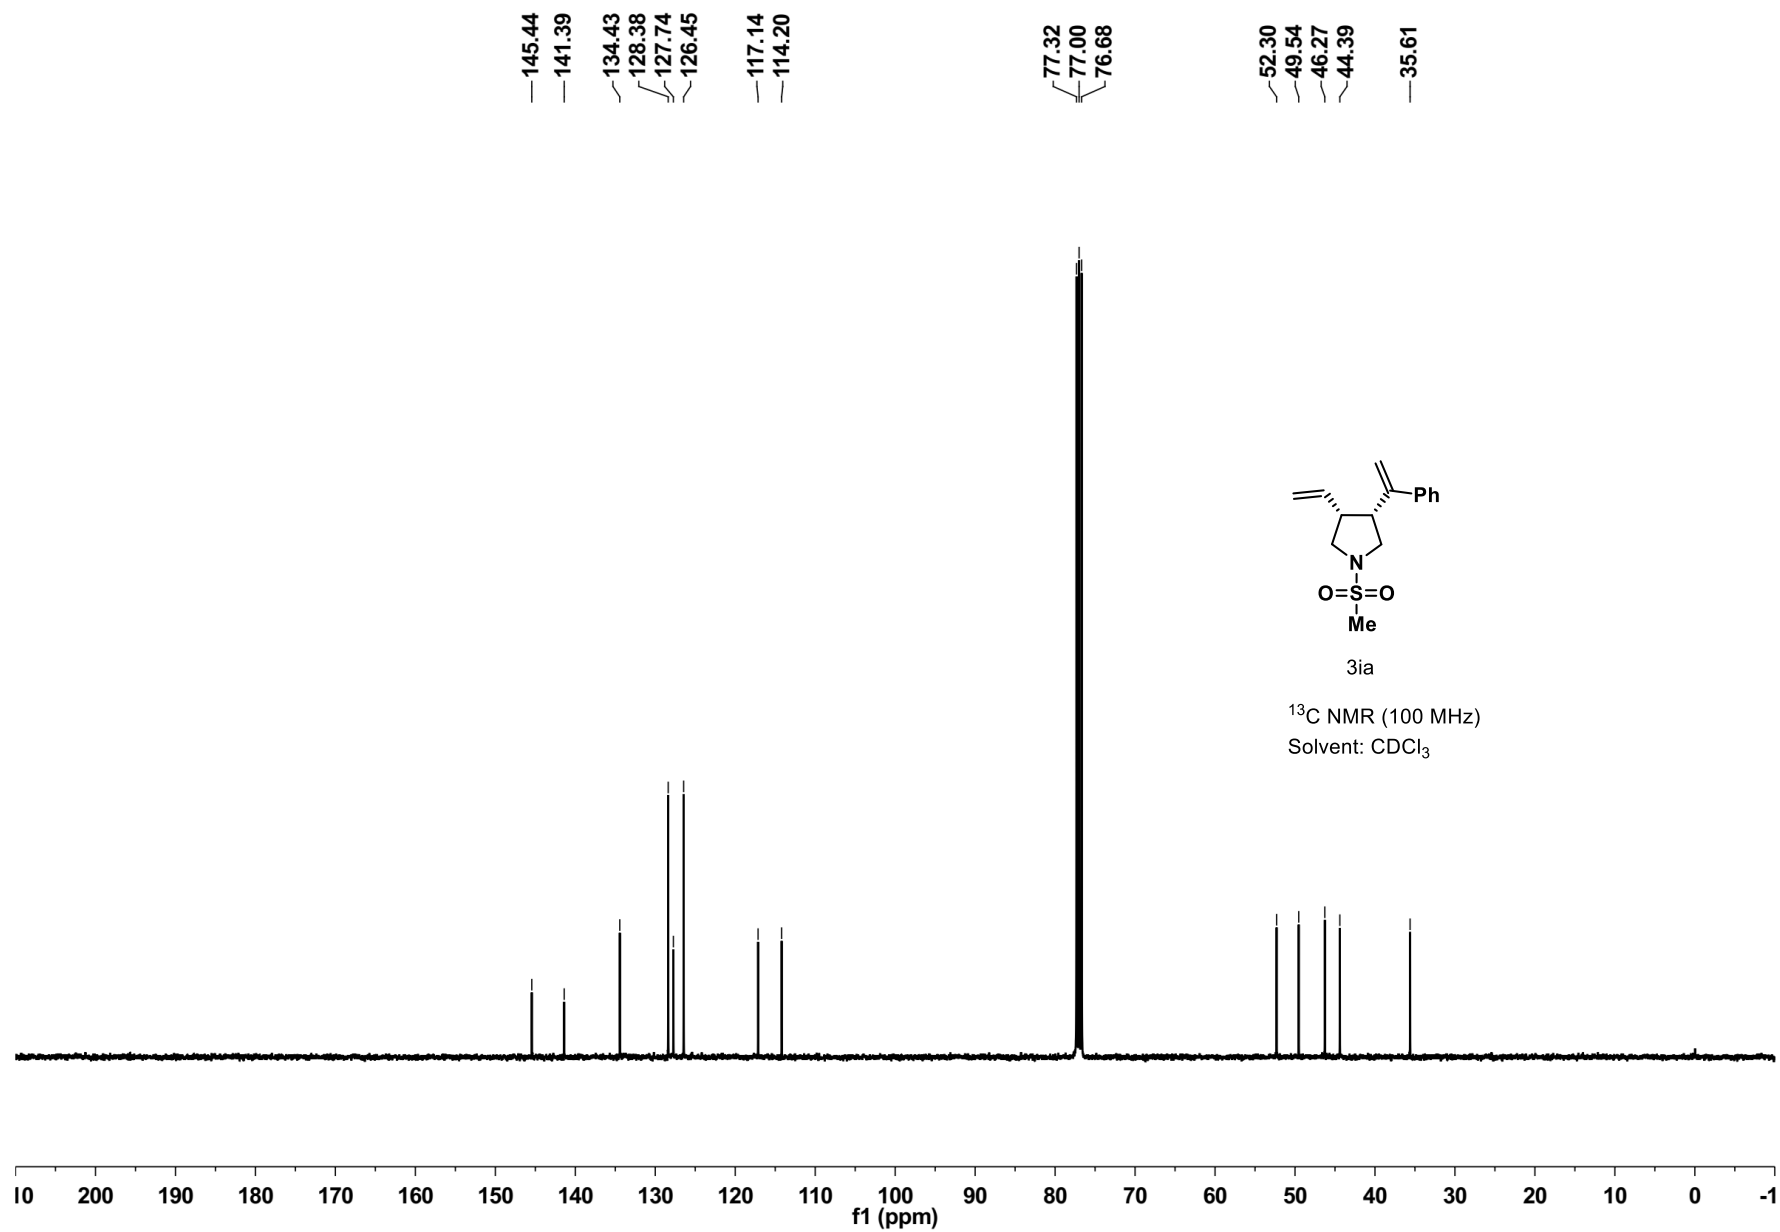

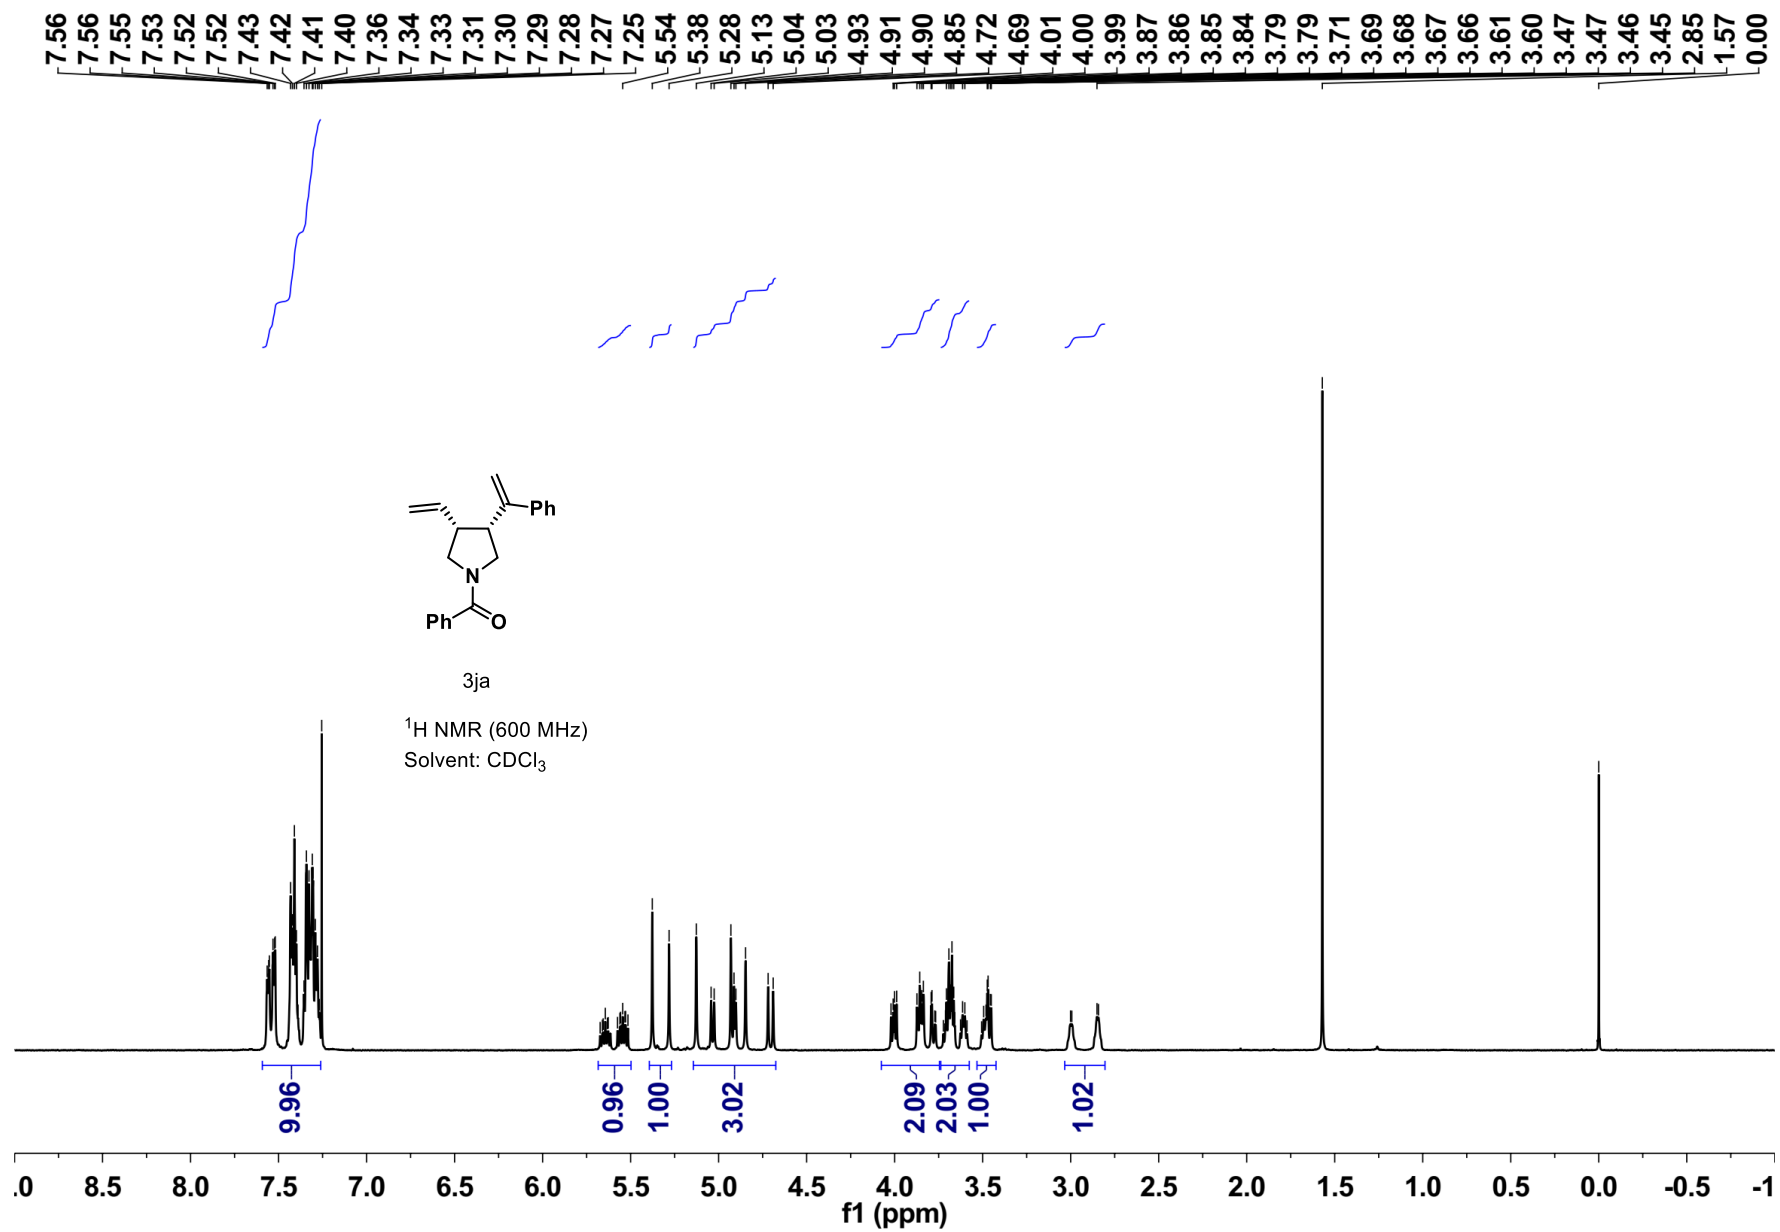

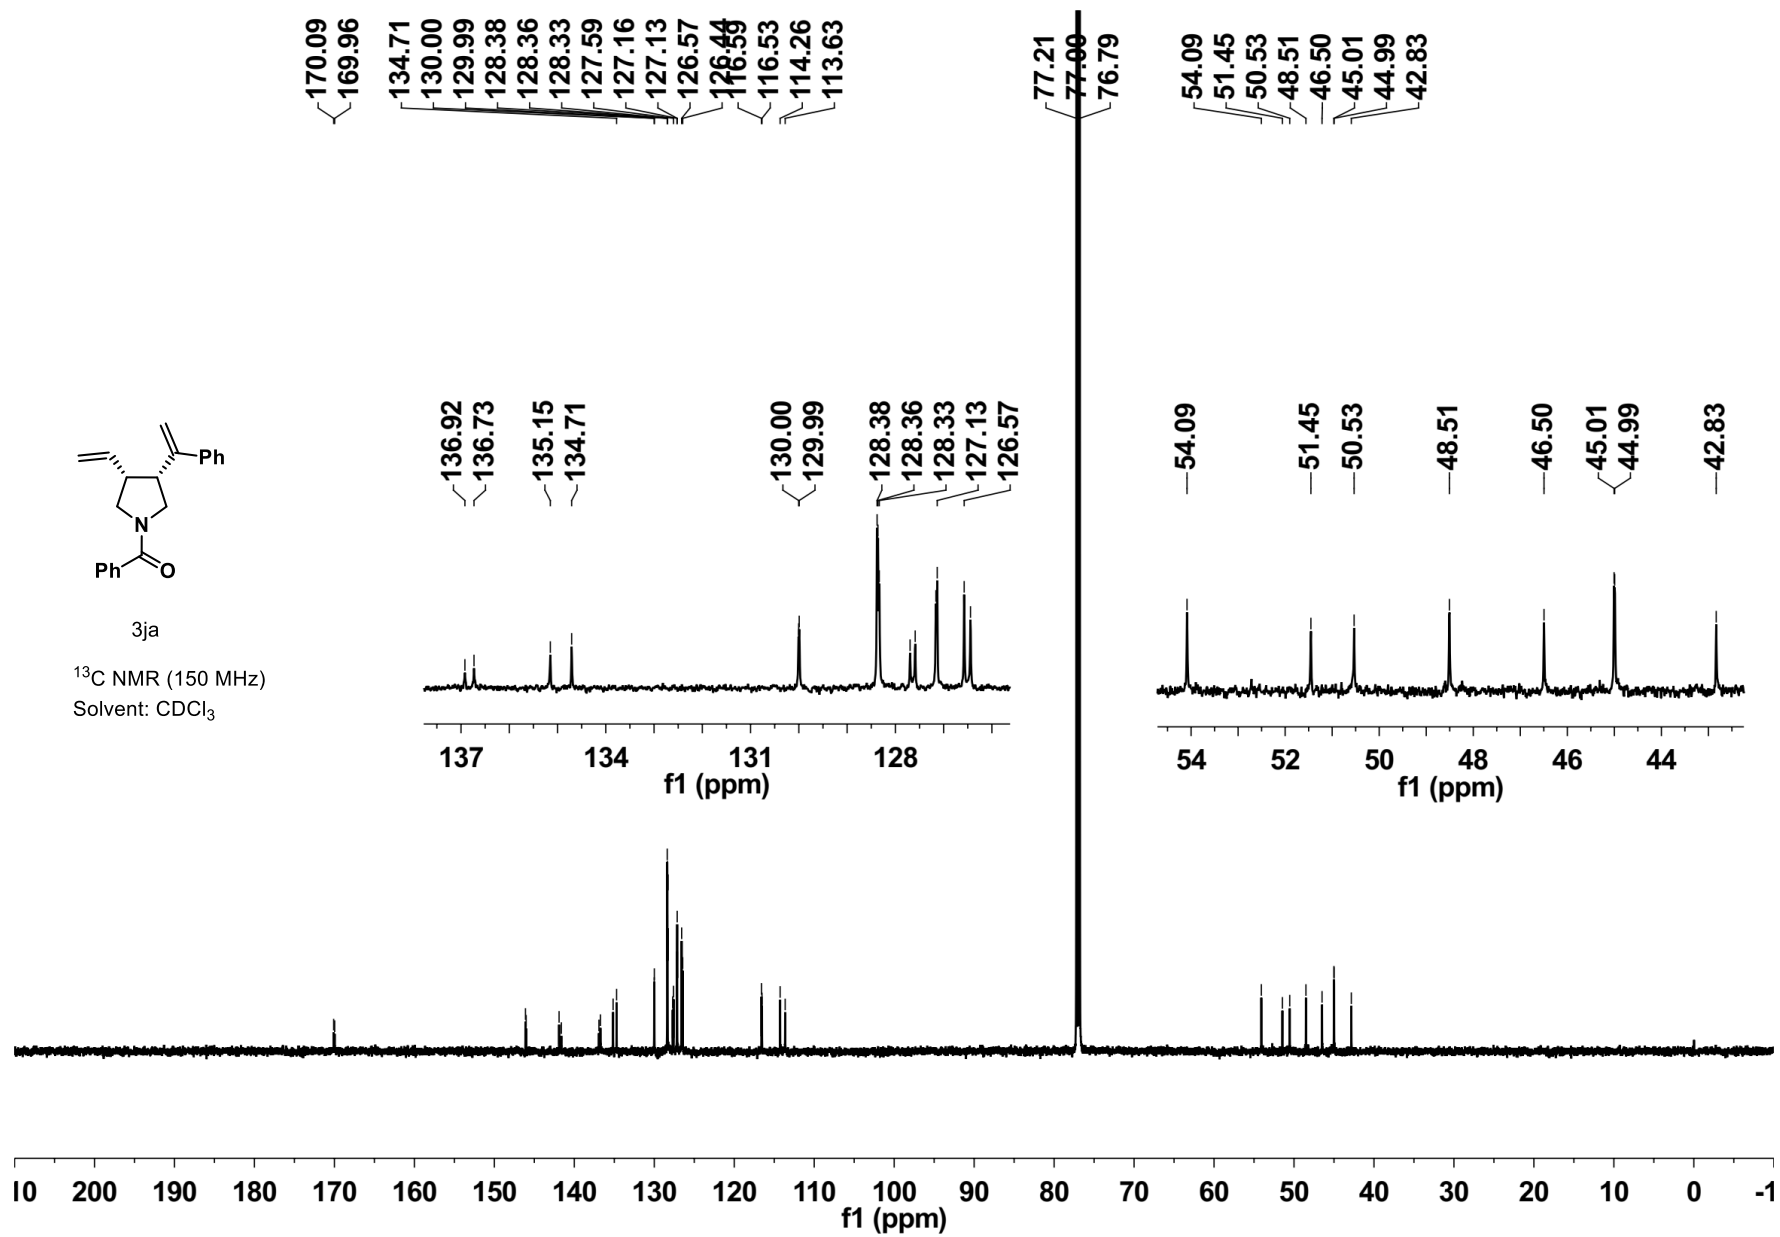



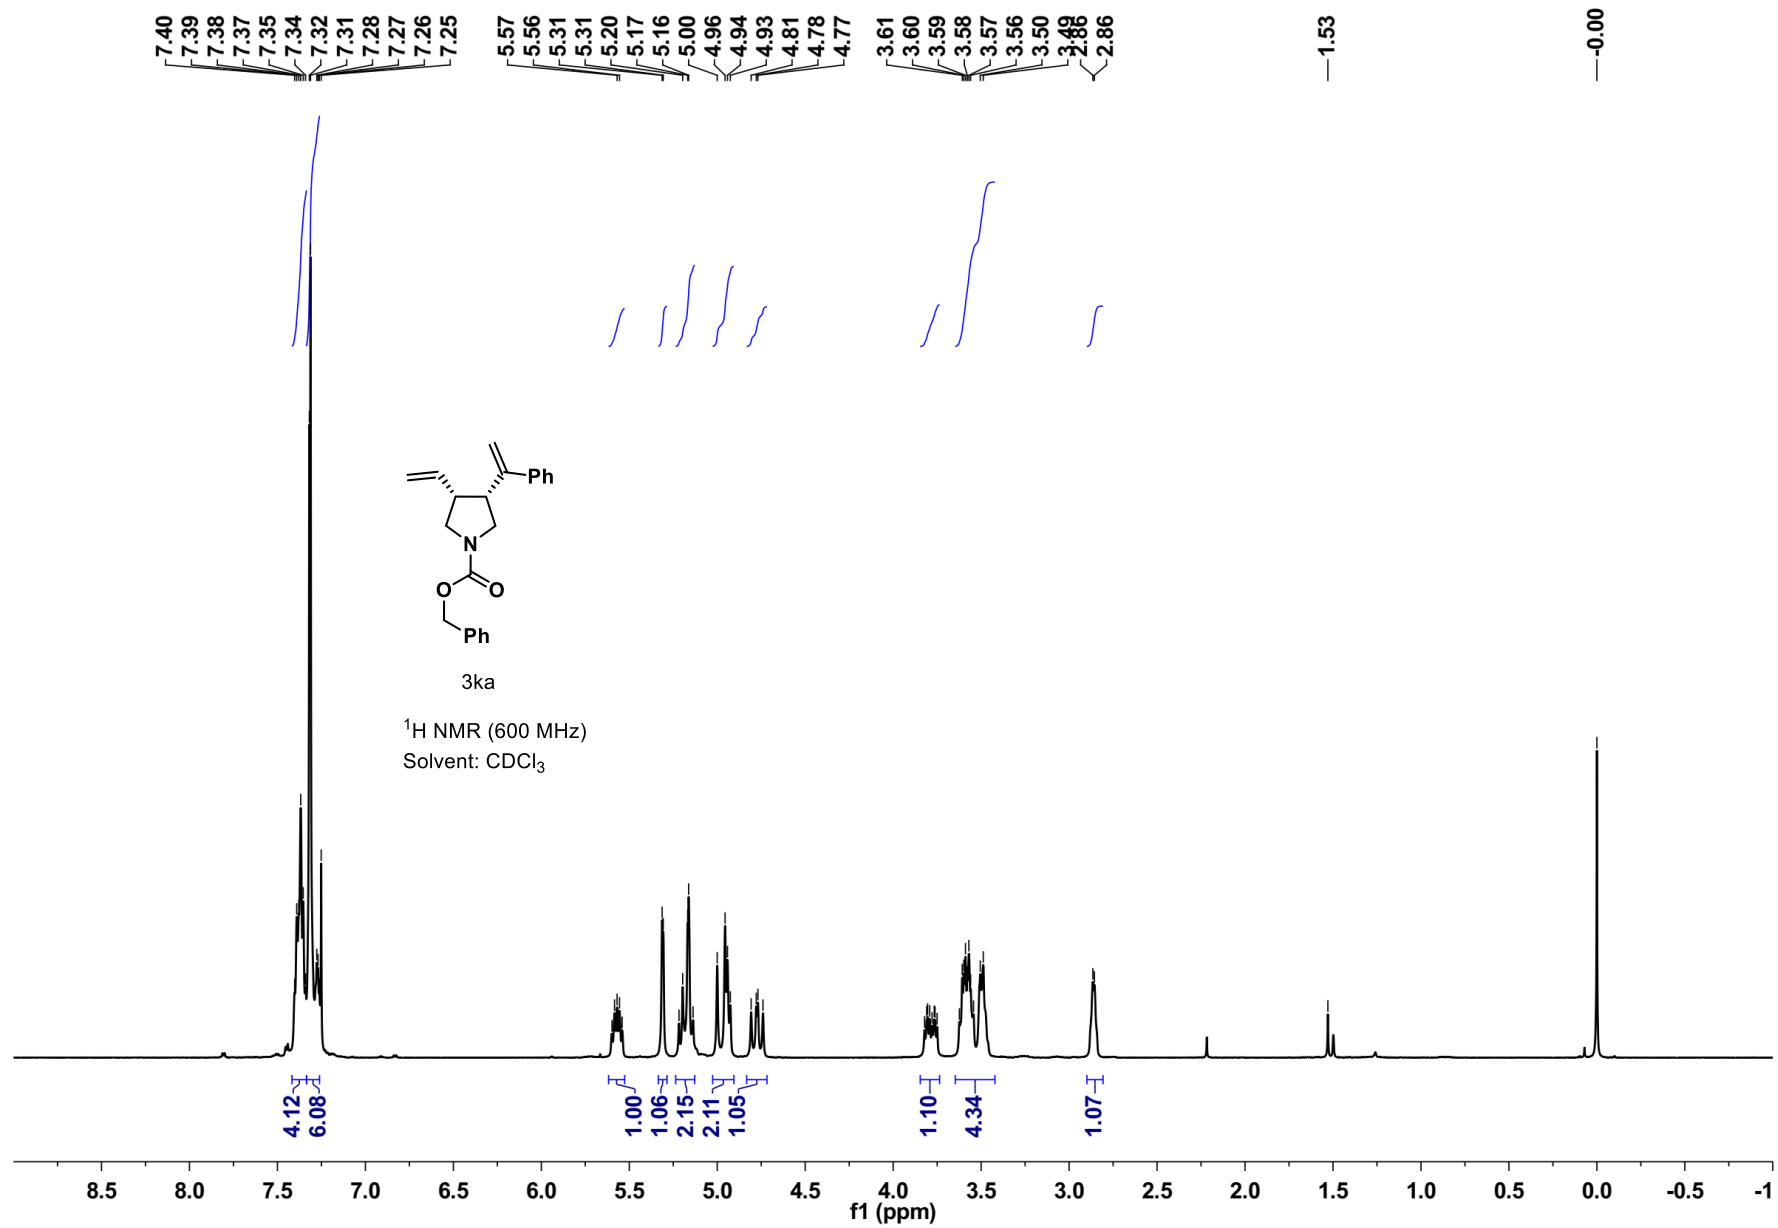

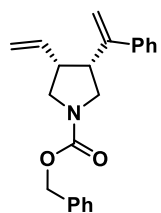

3ka

$^{13}\text{C}$  NMR (100 MHz)

Solvent:  $\text{CDCl}_3$

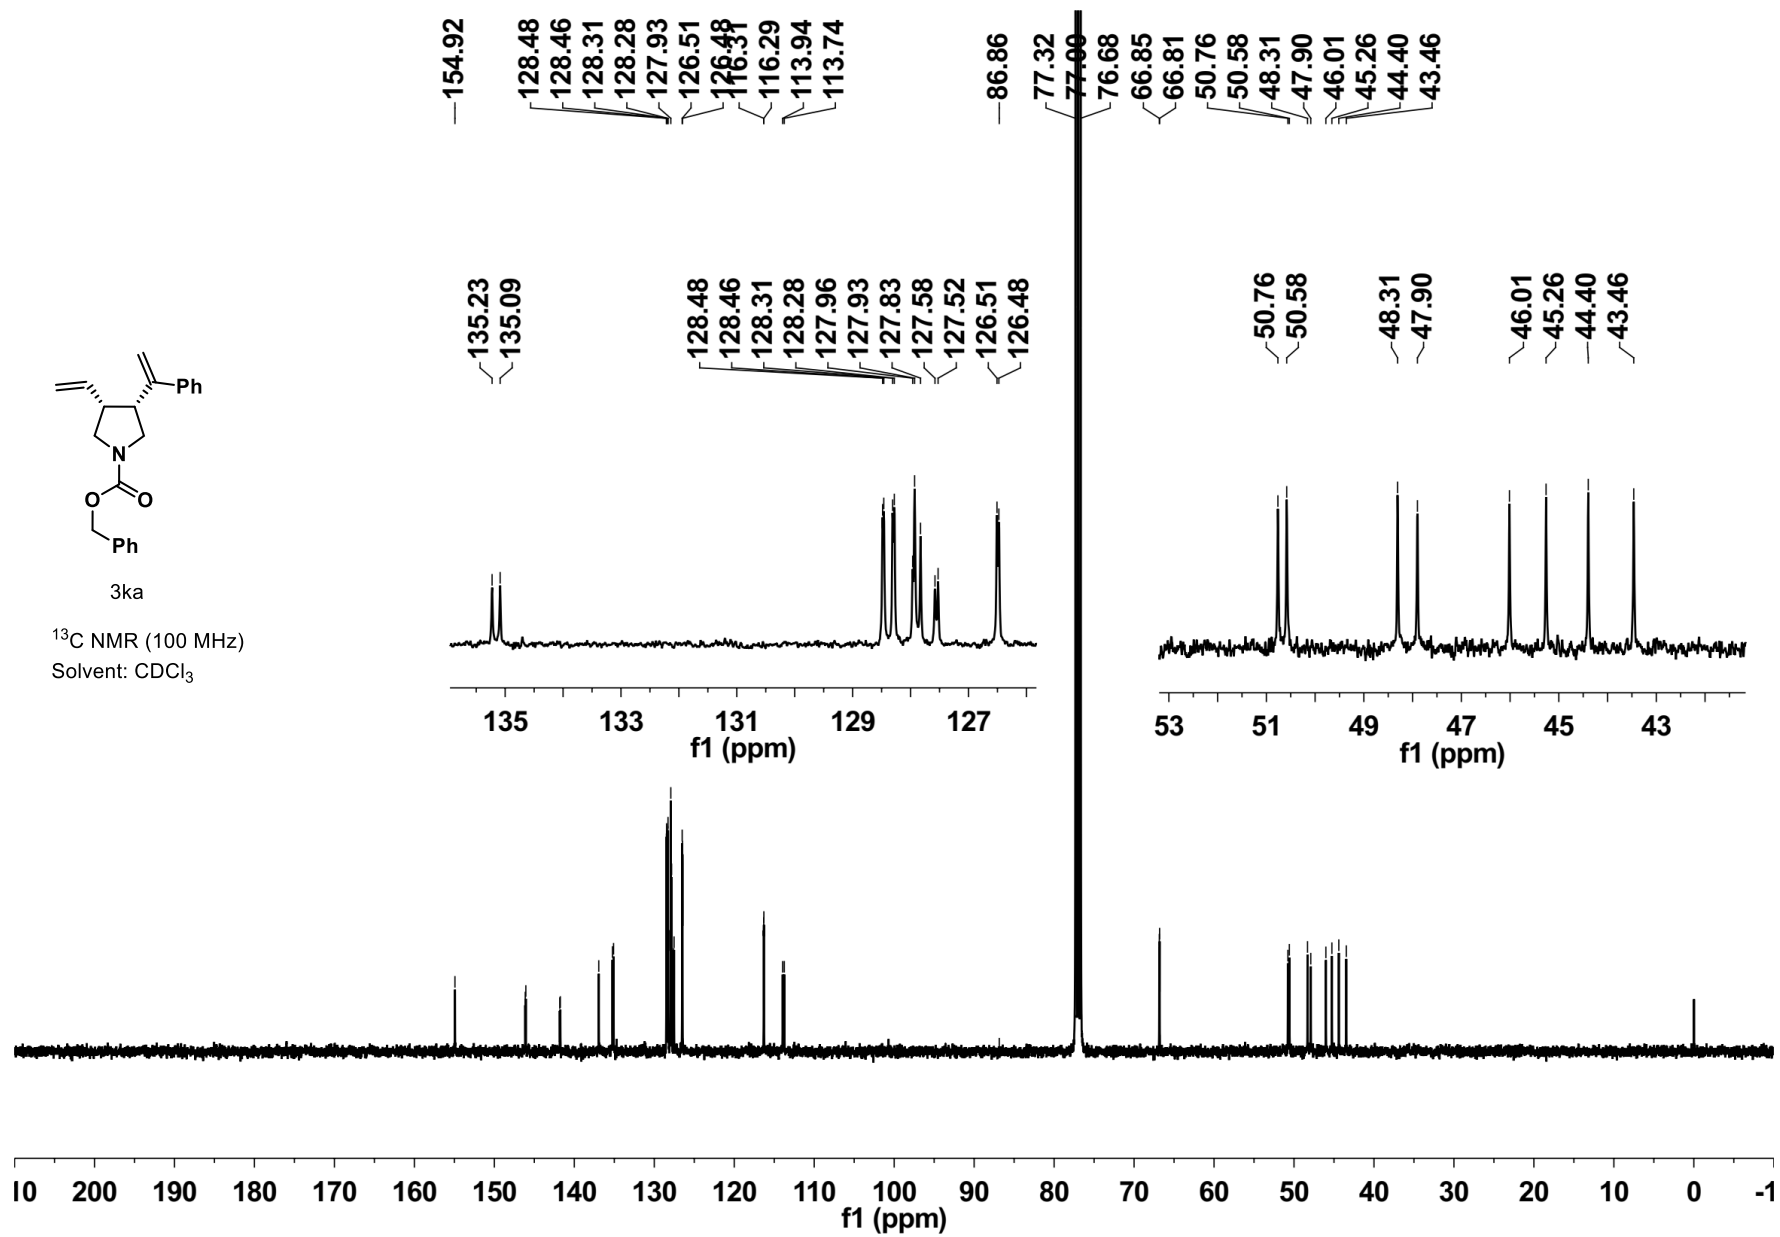

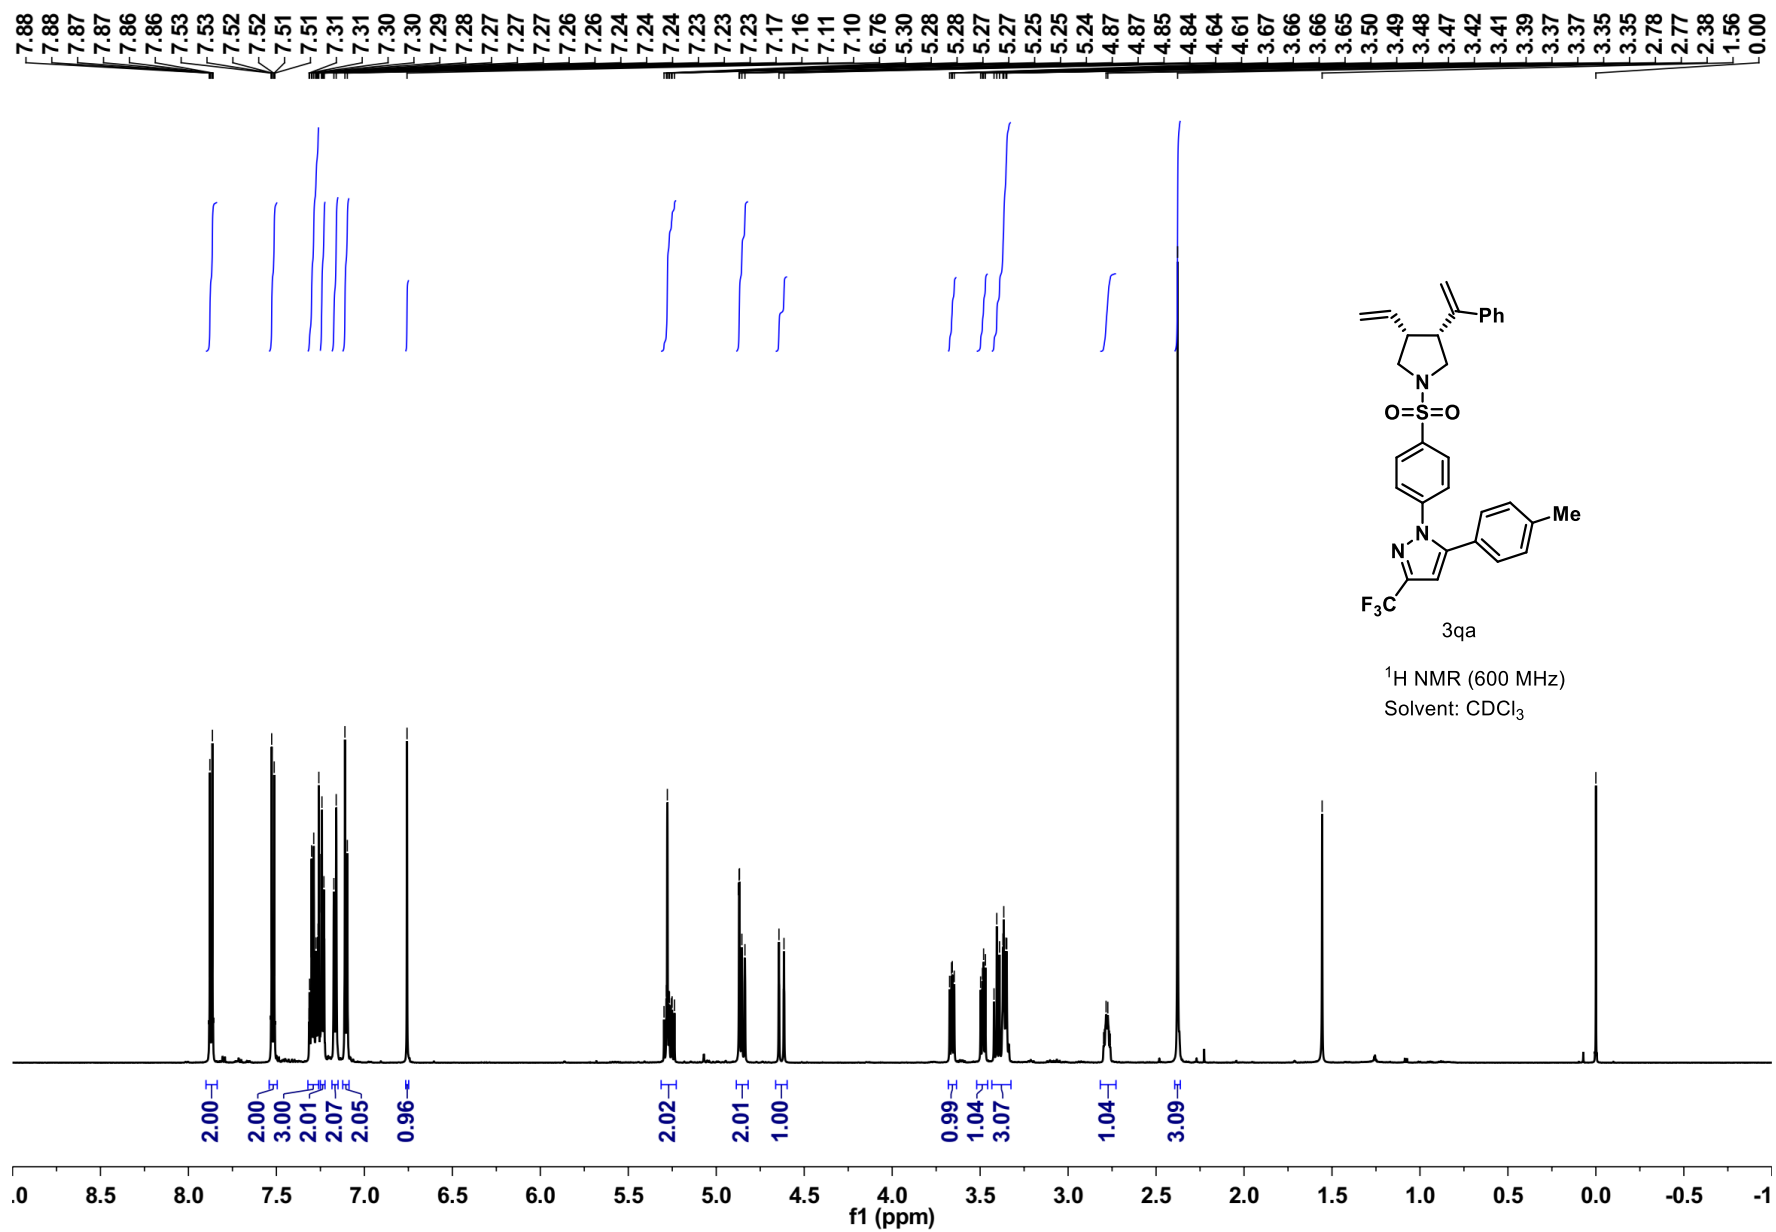

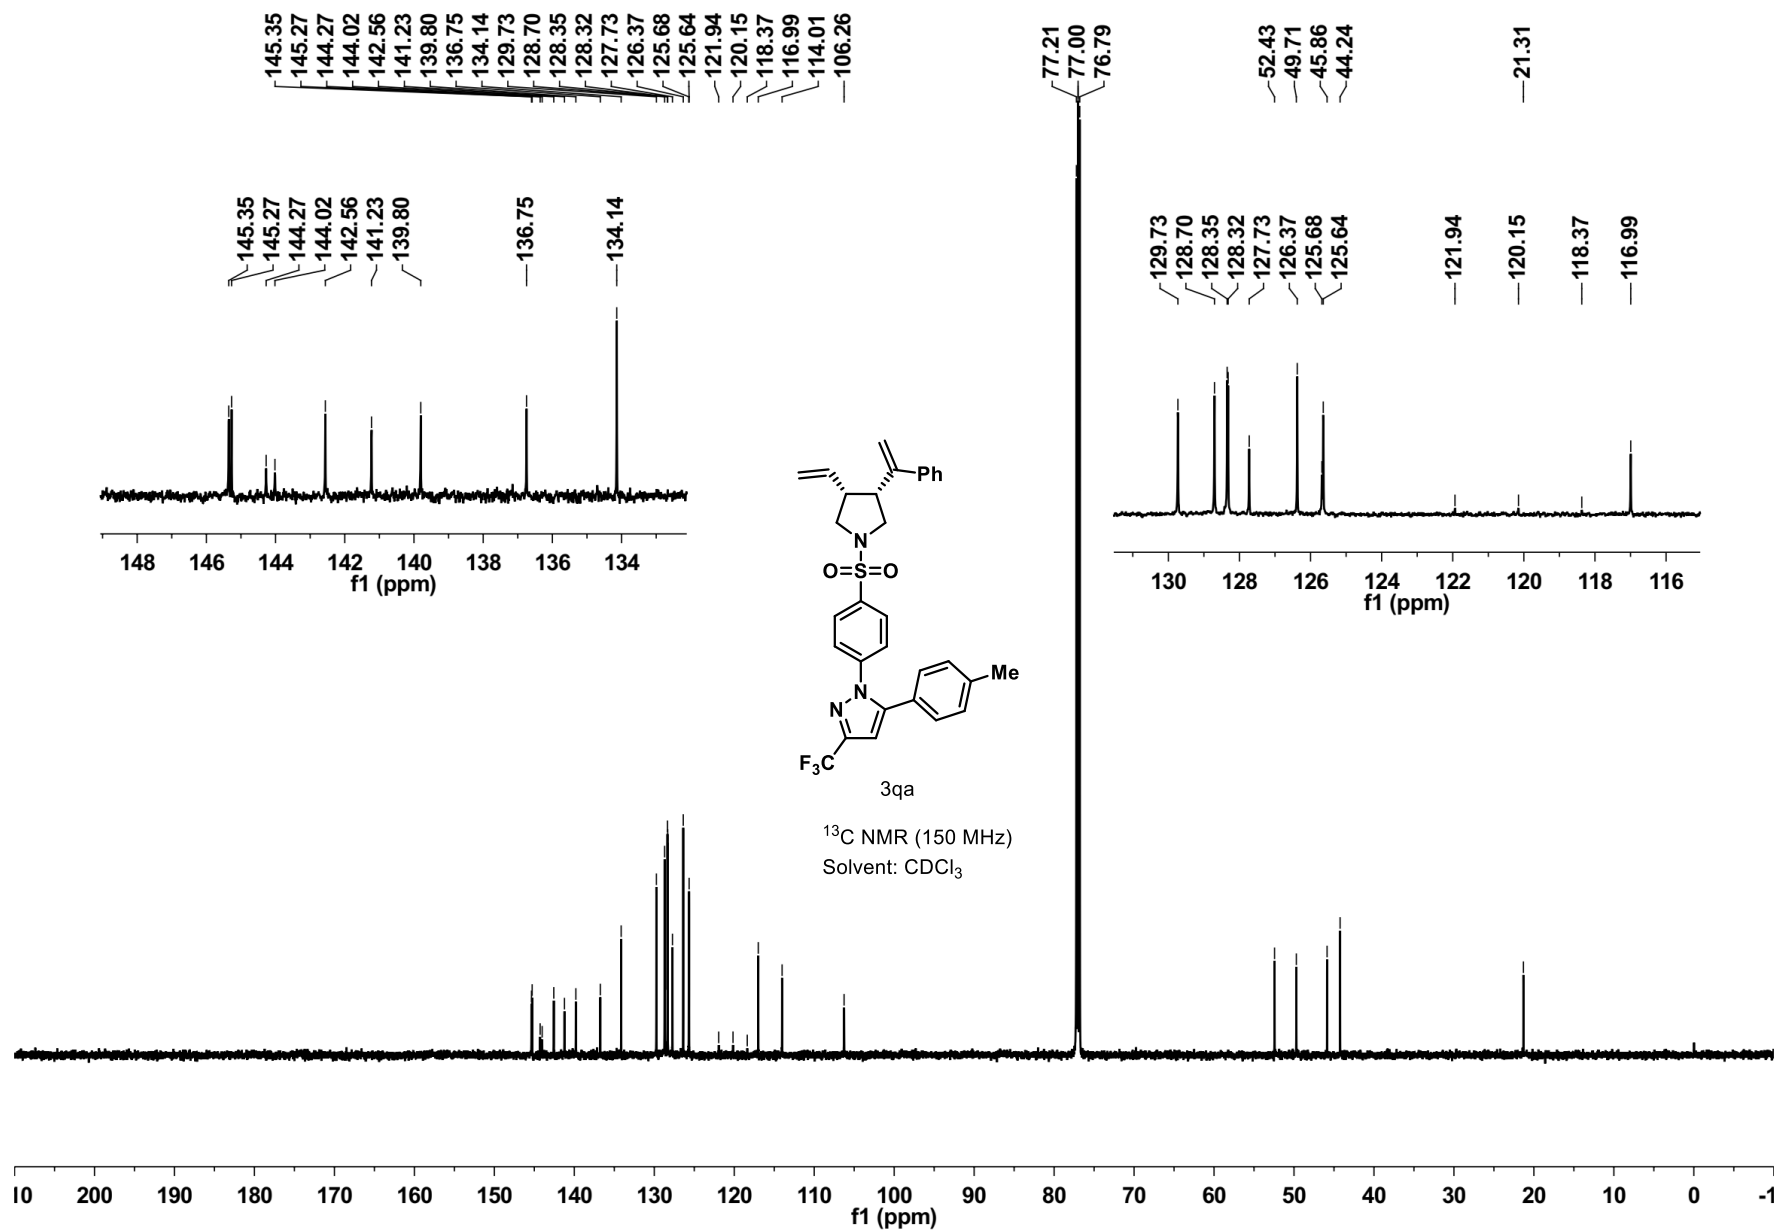

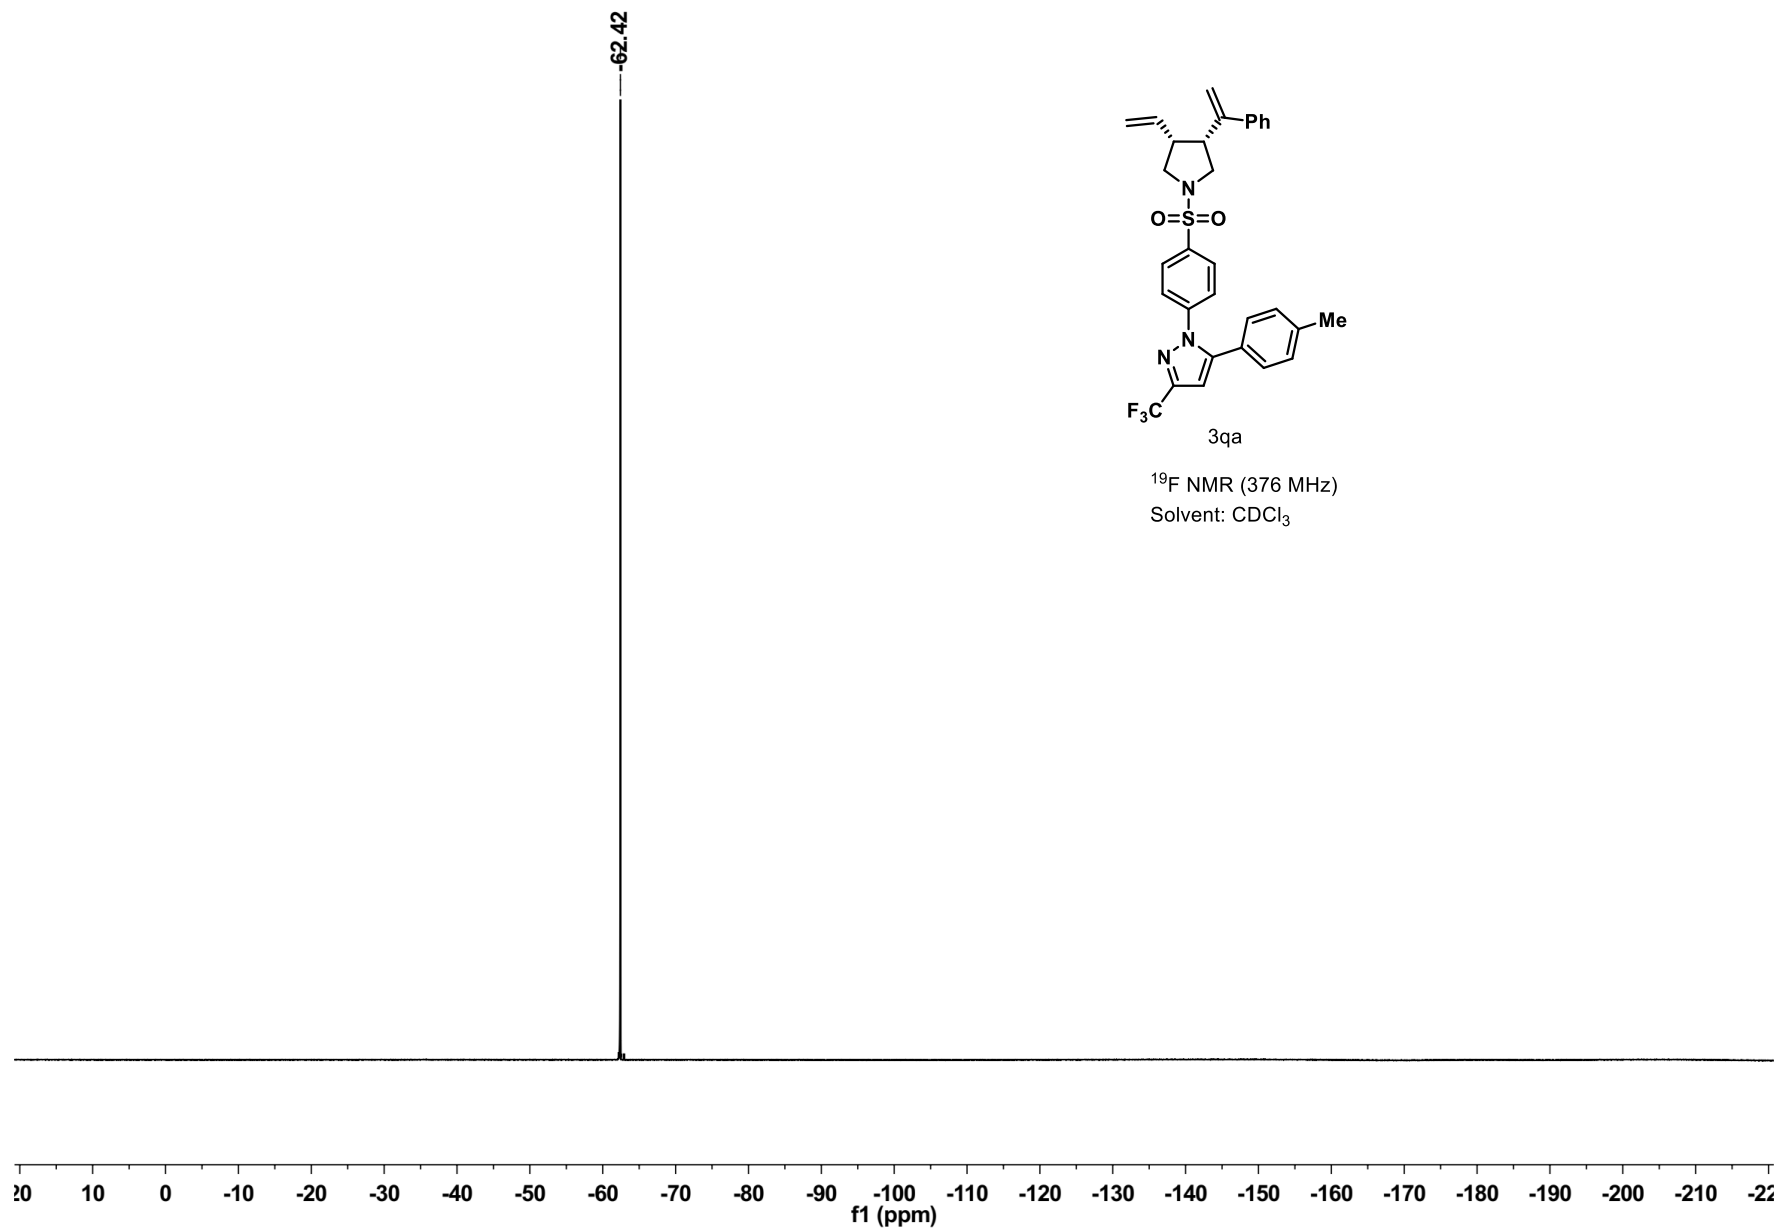

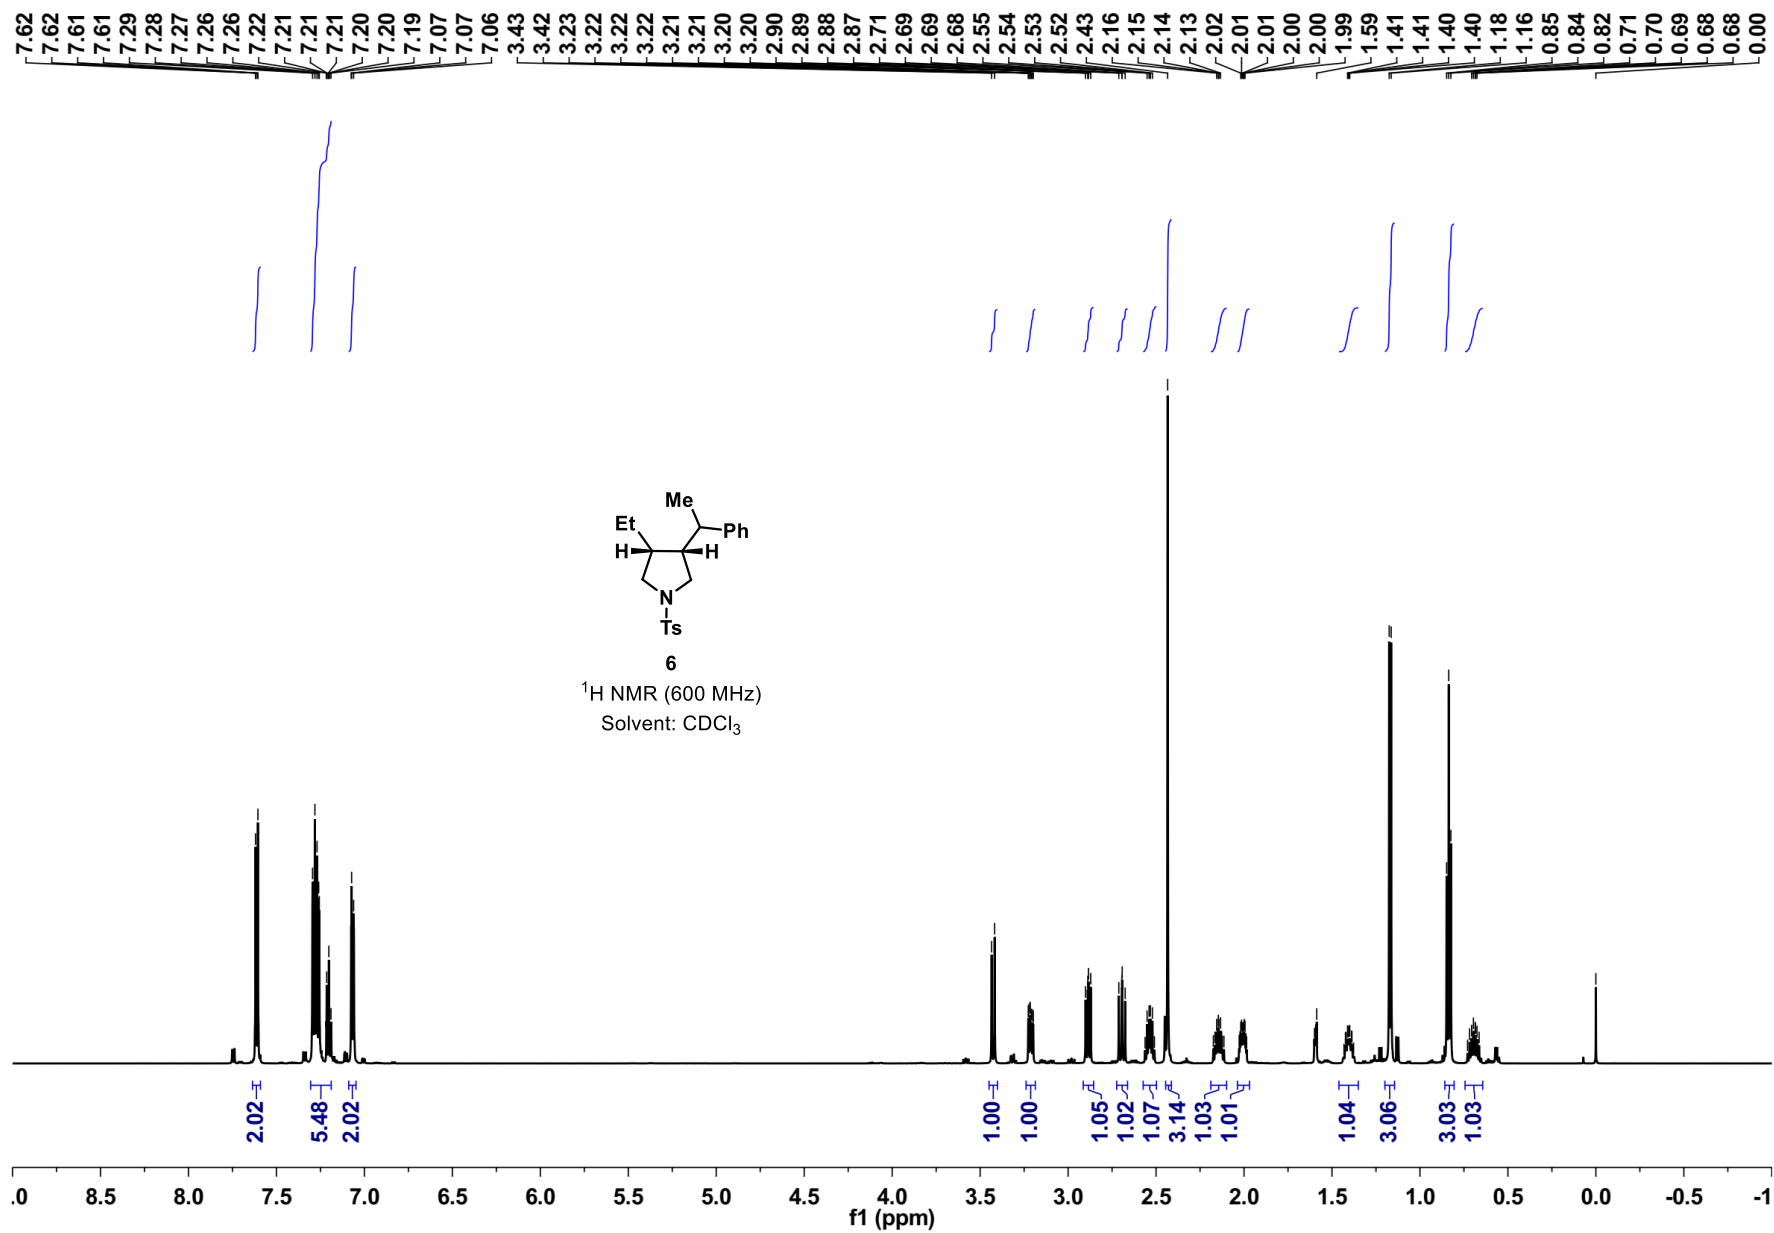

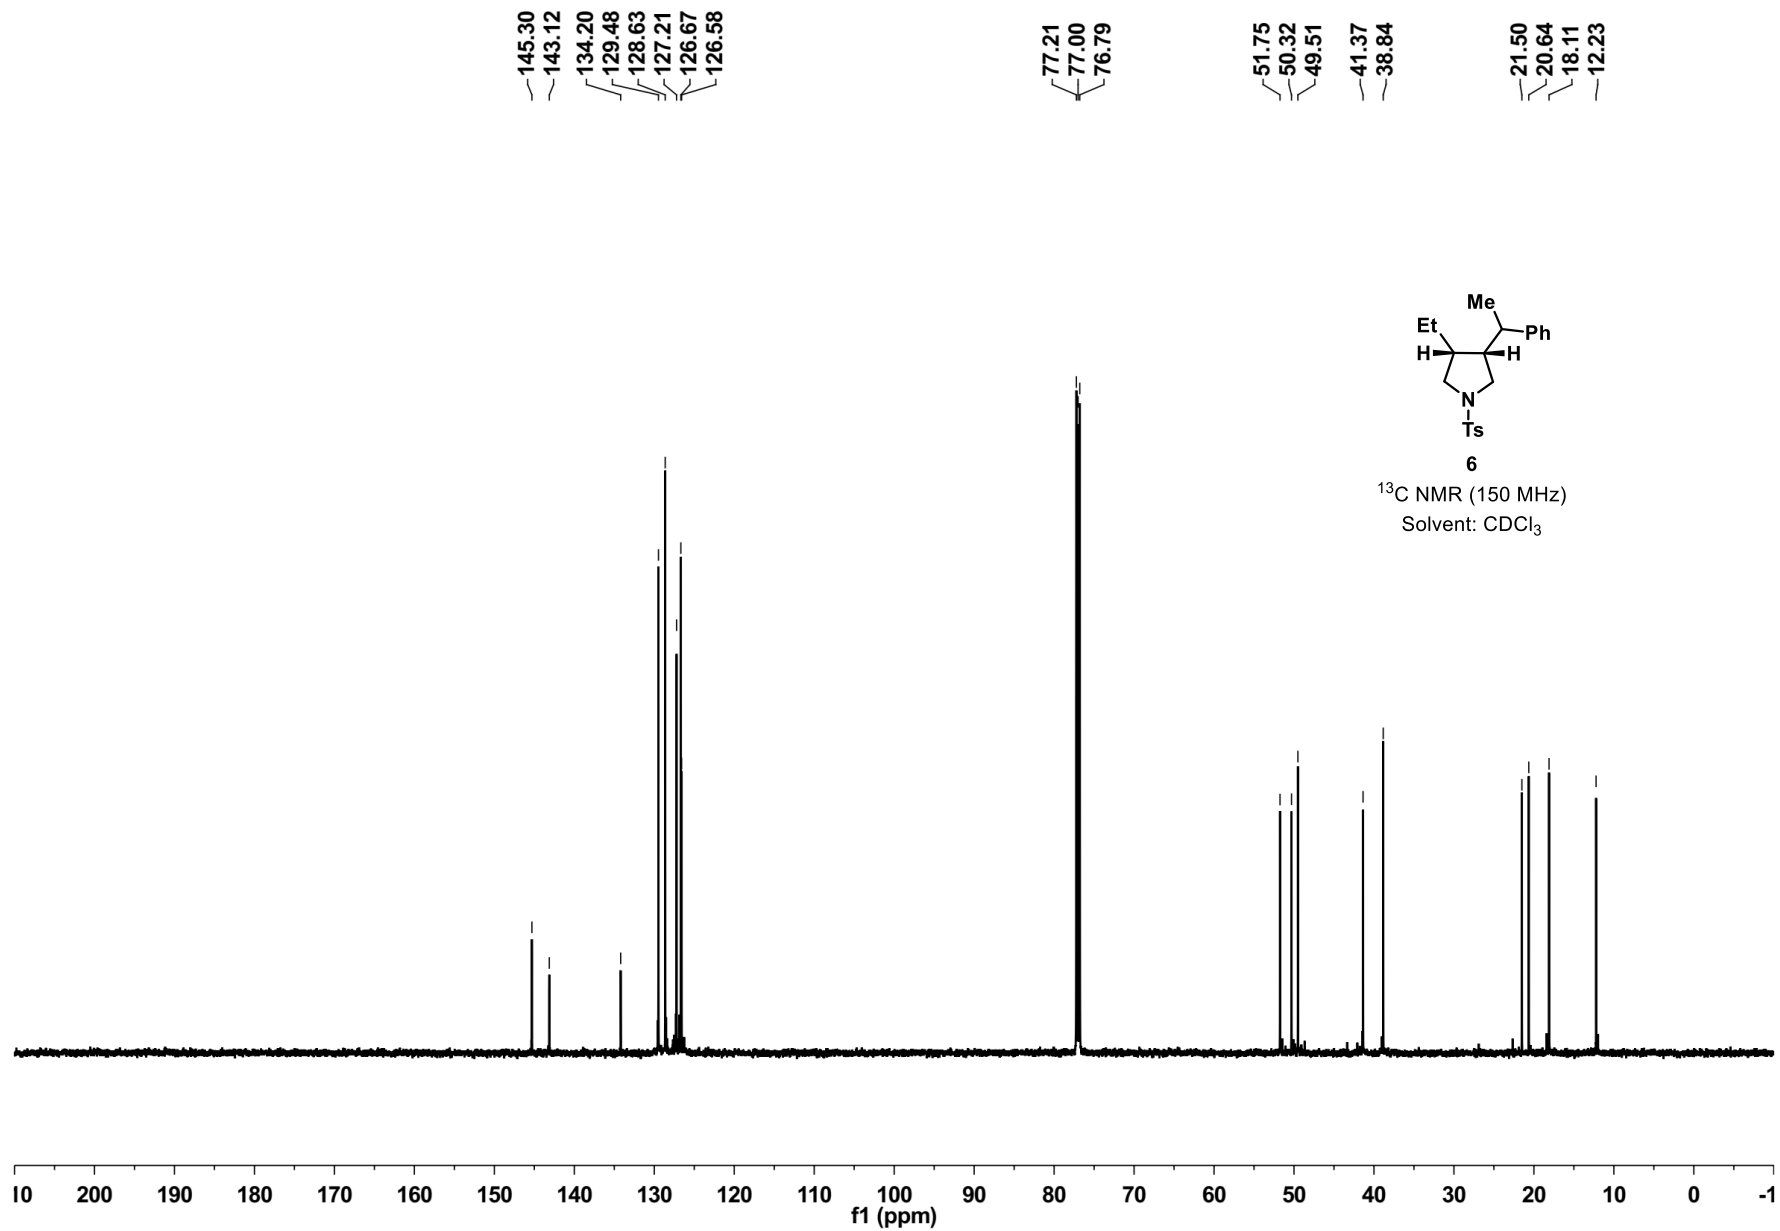

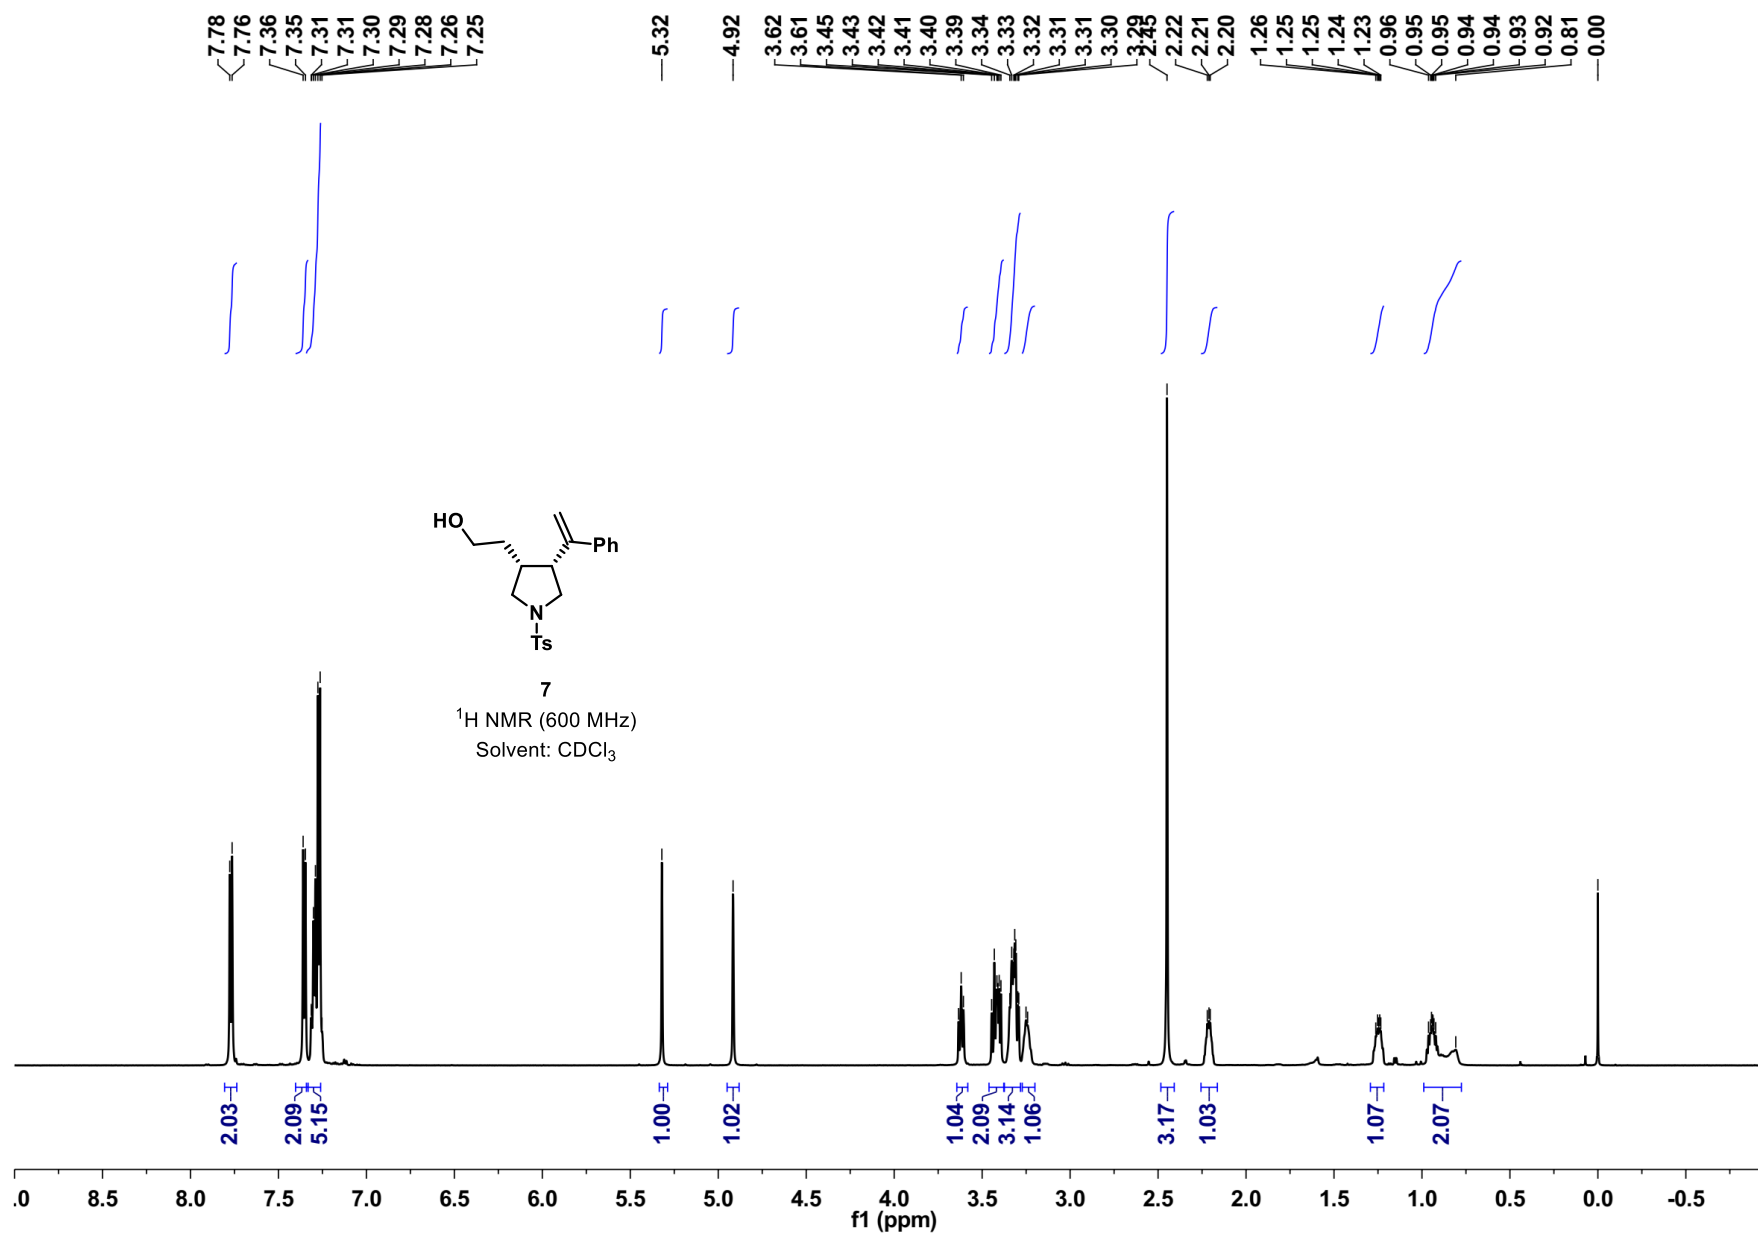



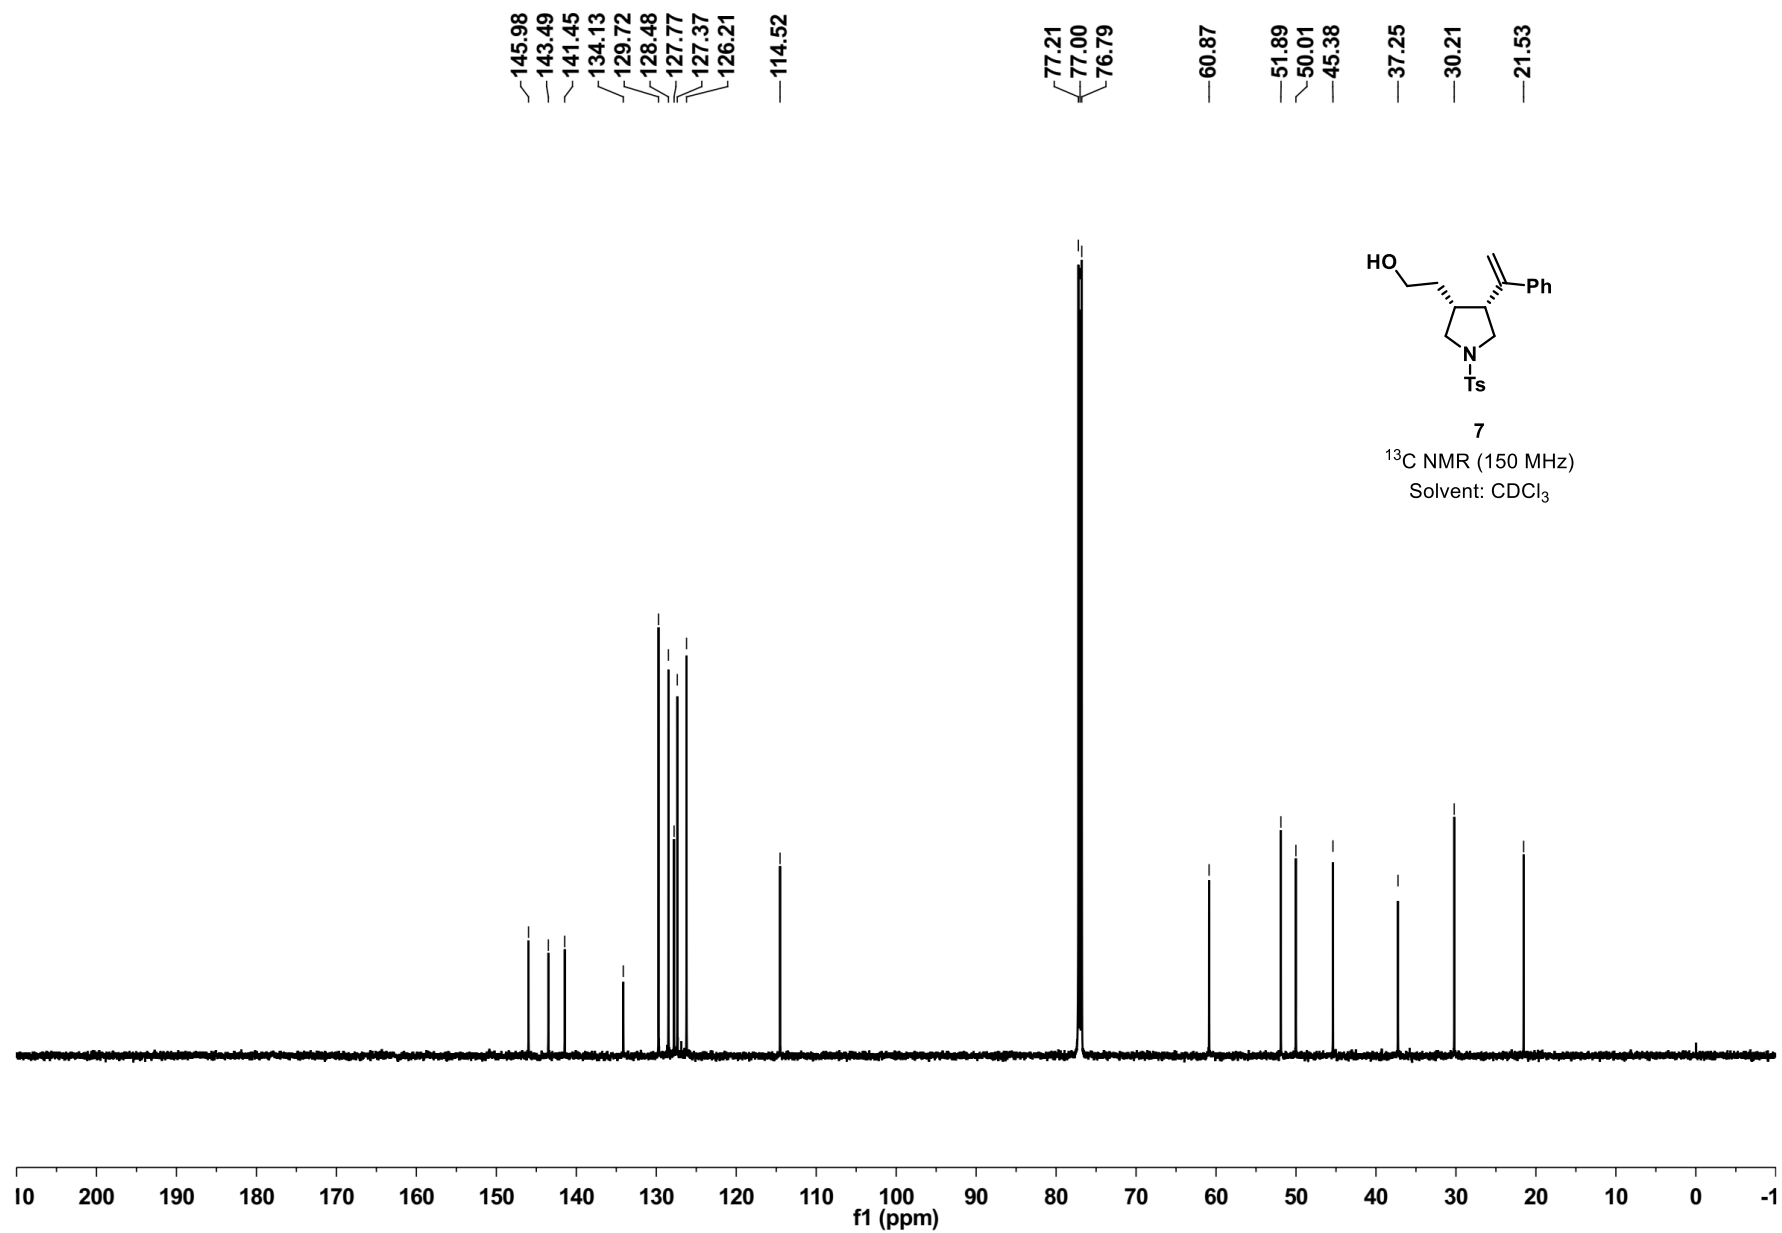

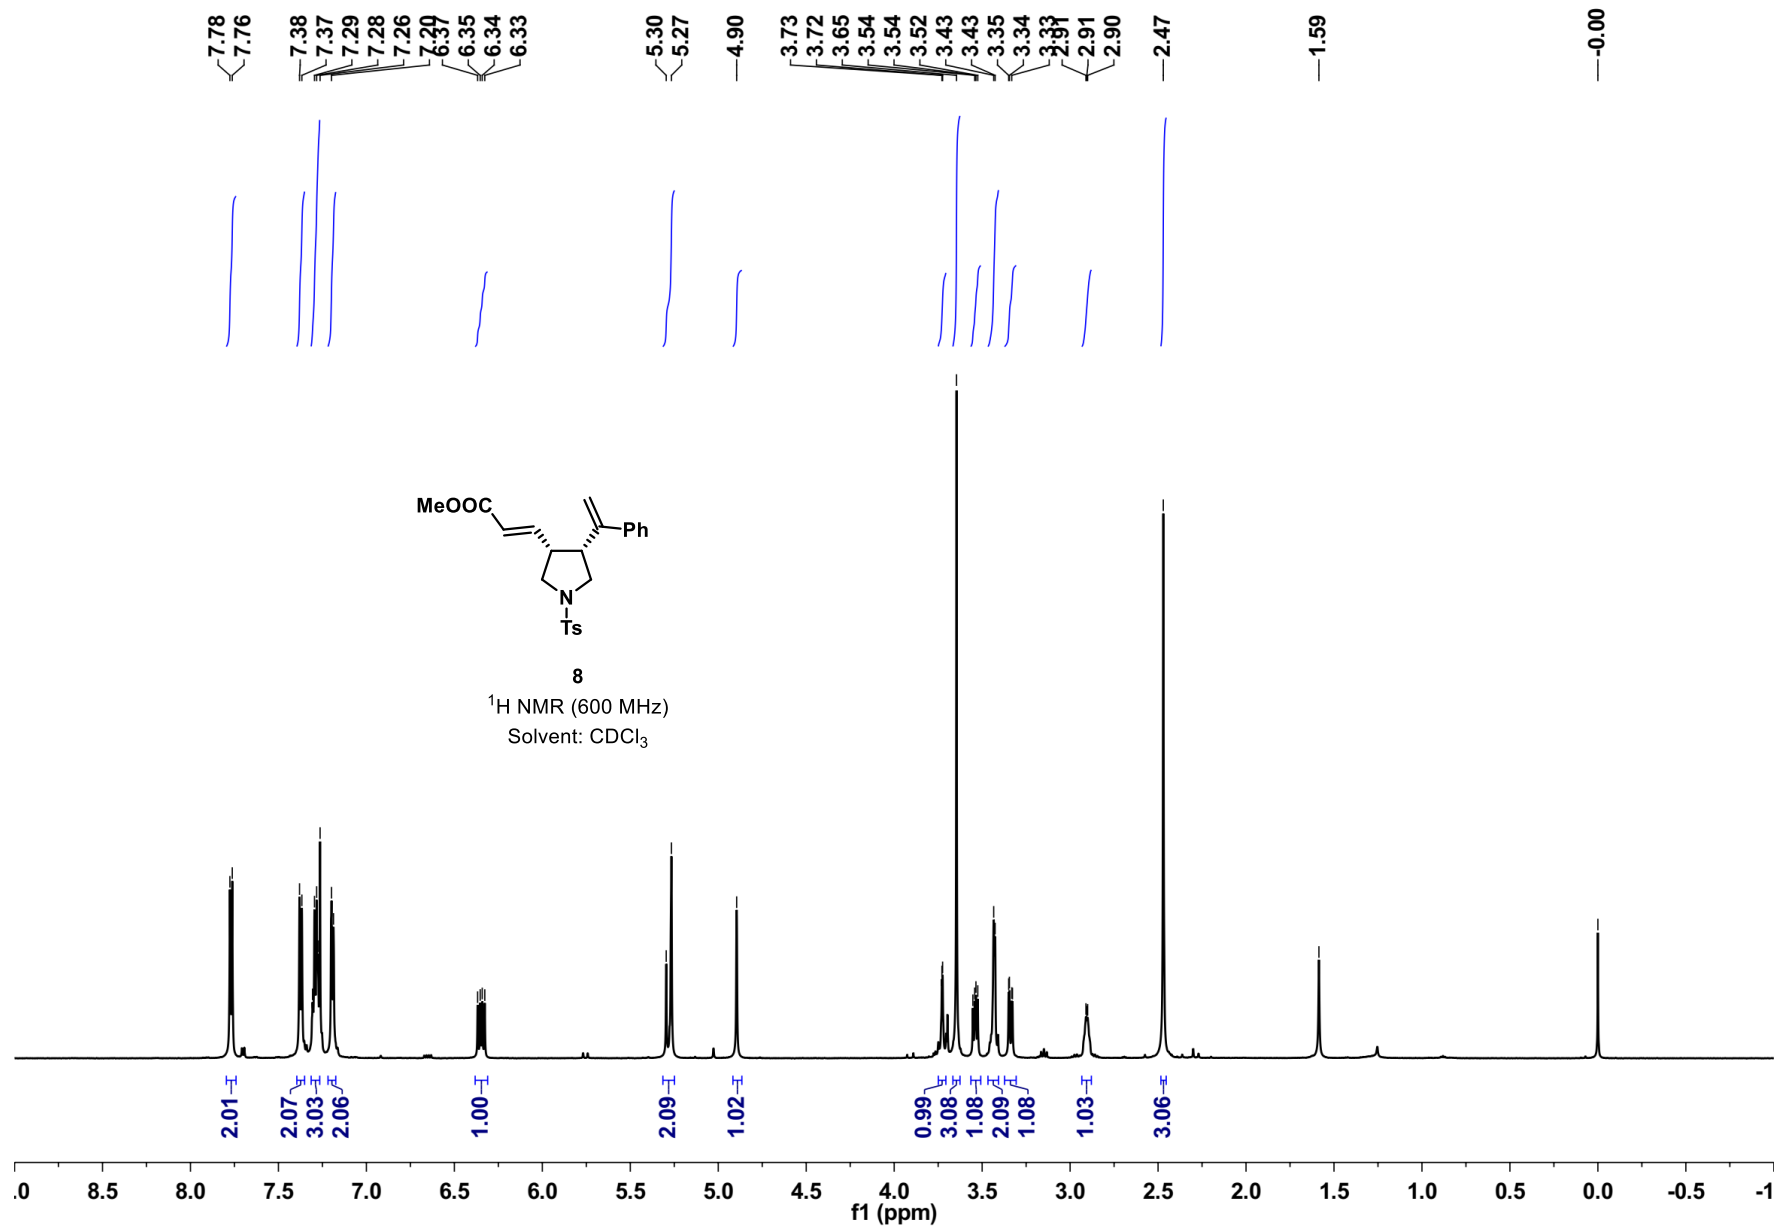

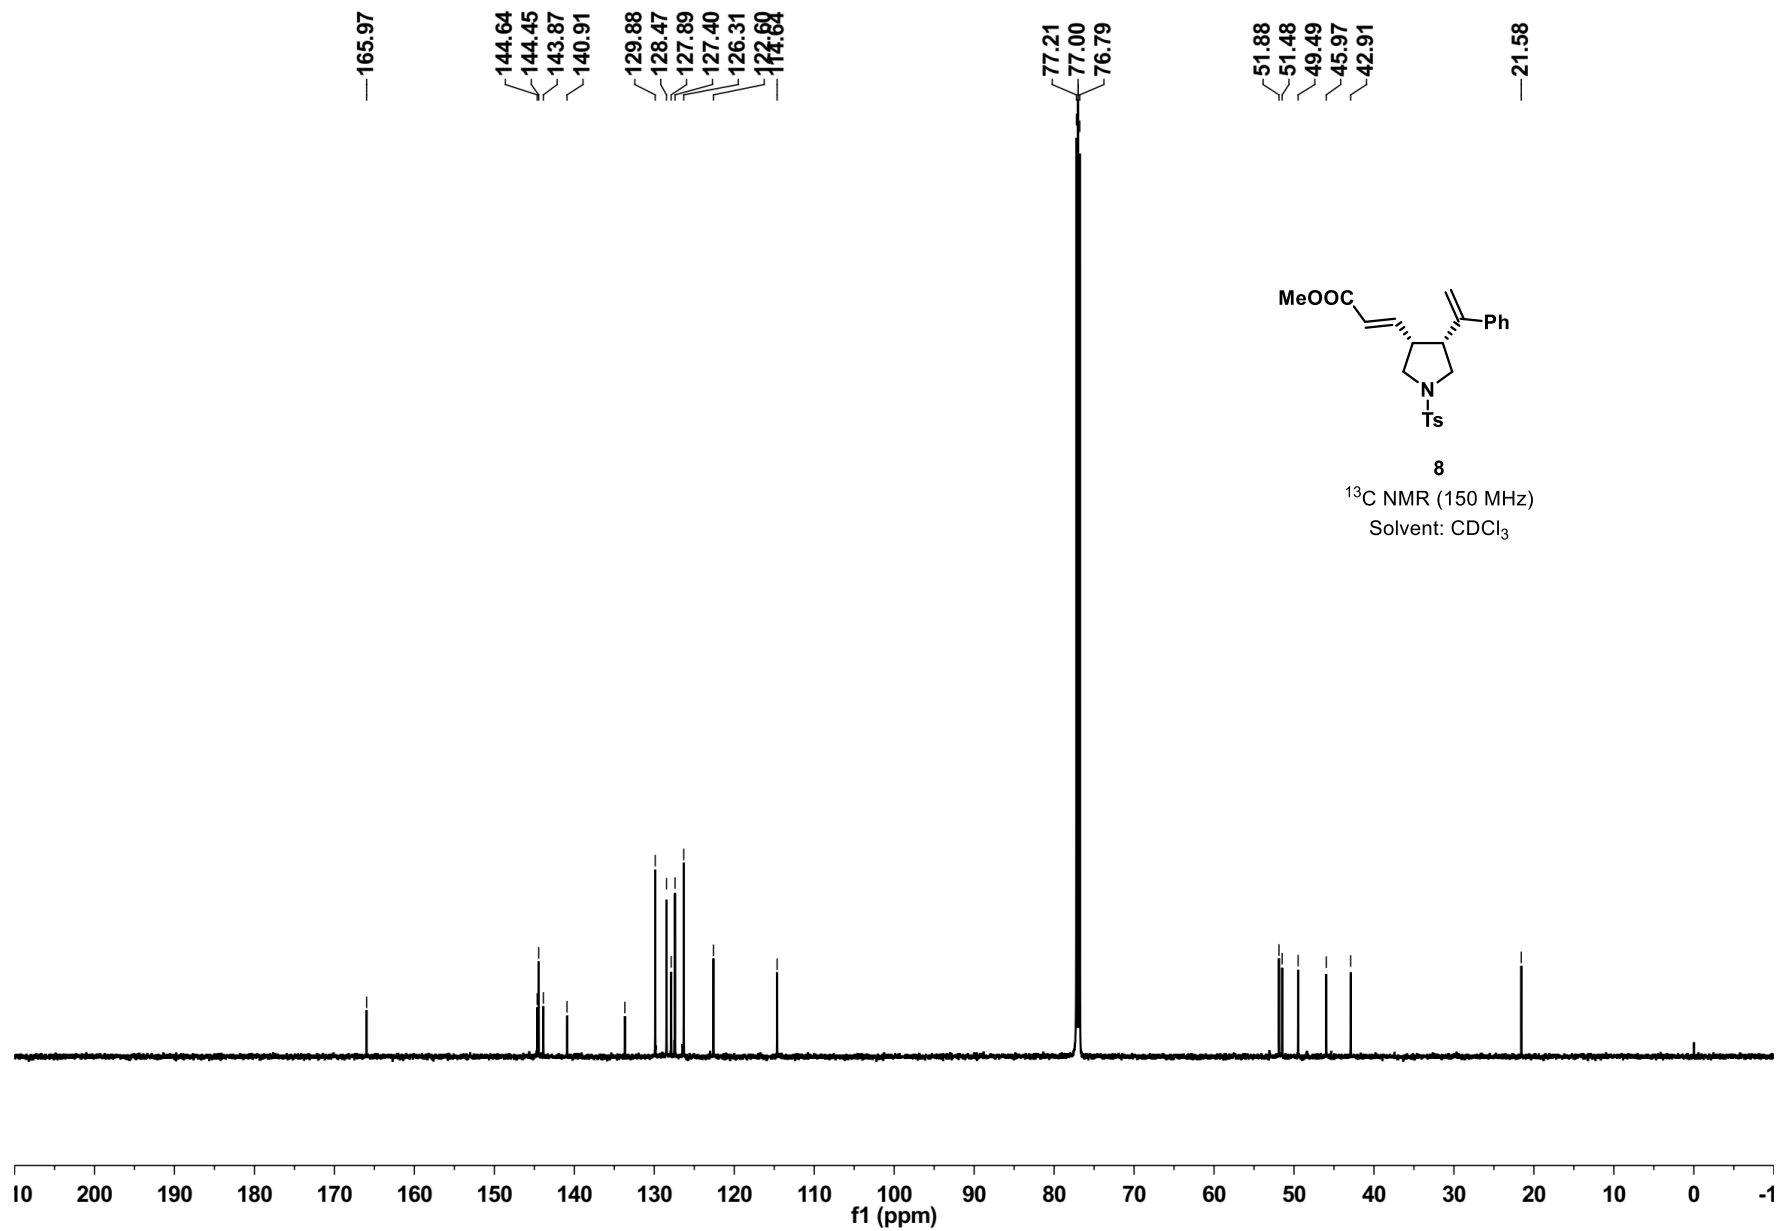

Supplement: d4qo01818d1.pdf [file d4qo01818d1.pdf]
